# Supplementary material for: Interpretable genotype-to-phenotype classifiers with performance guarantees
Source: PubMed Central journal article supplement (PMC6411721; doi:10.1038/s41598-019-40561-2), 2019-03-11
Supplement: 41598_2019_40561_MOESM1_ESM.pdf [file 41598_2019_40561_MOESM1_ESM.pdf]

# Interpretable genotype-to-phenotype classifiers with performance guarantees

## Supplementary information

Alexandre Drouin<sup>1,2,\*</sup>, Gaël Letarte<sup>1,2</sup>, Frédéric Raymond<sup>3,4</sup>, Mario Marchand<sup>1,2</sup>, Jacques Corbeil<sup>2,5</sup>, and François Laviolette<sup>1,2</sup>

<sup>1</sup>Department of Computer Science and Software Engineering, Université Laval, Quebec, Canada

<sup>2</sup>Big Data Research Centre, Université Laval, Quebec, Canada

<sup>3</sup>School of nutrition, Université Laval, Quebec, Canada

<sup>4</sup>Institute of Nutrition and Functional Foods, Université Laval, Quebec, Canada

<sup>5</sup>Infectious Disease Research Centre, Université Laval, Quebec, Canada

\*alexandre.drouin.8@ulaval.ca

## Supplementary methods

### A sample compression risk bound for decision trees

Based on the pioneering work of Littlestone and Warmuth (1986)<sup>1</sup> and Floyd and Warmuth (1995)<sup>2</sup>, Marchand and Sokolova (2005)<sup>3</sup> obtained a general sample compression bound that can be used to upper bound the generalization error (see Equation (1) of main text) of any classifier  $h$ , such that  $h = \mathbf{R}(Z, \sigma)$ , where  $\mathbf{R}$  is a reconstruction function that unambiguously reconstructs  $h$  using a small subset  $Z$  of the training examples (referred to as the *compression set*) and a message  $\sigma$  of additional information. Their bound is as follows: for any data-generating distribution  $D$ , any compression set  $Z$  and message  $\sigma$ , we have that, with probability at least  $1 - \delta$  (over the random draws of  $S$  according to  $D^m$ ),  $R(h) \leq \varepsilon(h, S, \delta)$ , with

$$\varepsilon(h, S, \delta) = 1 - \exp\left(\frac{-1}{m - |Z| - r} \left[ \ln\binom{m}{|Z|} + \ln\binom{m - |Z|}{r} + \ln\left(\frac{1}{P_Z(\sigma)}\right) + \ln\left(\frac{1}{\xi(|Z|)\xi(r)\delta}\right) \right]\right), \quad (\text{S1})$$

where  $Z \subseteq S$ ,  $P_Z(\sigma)$  is the prior probability assigned to the message  $\sigma$  given that the compression set is  $Z$ ,  $|Z|$  denotes the number of examples in the compression set  $Z$ ,  $r$  is the number of prediction errors made by  $h$  on  $S \setminus Z$ , and

$$\xi(a) \stackrel{\text{def}}{=} \frac{6}{\pi^2} (a+1)^{-2}. \quad (\text{S2})$$

In order to use this result to obtain a sample compression bound for  $k$ -mer-based decision tree models used in this study, we must design a message  $\sigma$ , and a corresponding compression set  $Z$ , that jointly allow to unambiguously reconstruct any decision tree classifier  $h$ . Recall from the main text that  $Z$  contains the genomes selected such that every  $k$ -mer in the model appears at least once in  $Z$ . Recall also that  $N(Z)$  denotes the number of nucleotides contained in  $Z$ .

Our approach relies on the fact that any tree with  $n$  inner nodes admits a unique preorder enumeration of its  $2n + 1$  nodes ( $n$  inner nodes and  $n + 1$  leaves). We also consider that each message  $\sigma$  is given by a tuple  $(n, \mathbf{v}_1, \mathbf{v}_2, \mathbf{v}_3)$ , where

- $\mathbf{v}_1 \in \{0, 1\}^{2n+1}$  is a vector that gives the type of each node in the enumeration, such that  $v_{1_i} \stackrel{\text{def}}{=} 1$  if the  $i^{\text{th}}$  node is an inner node and  $v_{1_i} \stackrel{\text{def}}{=} 0$  otherwise.
- $\mathbf{v}_2 \in \{1, \dots, c\}^{n+1}$  is a vector indicating the class predicted by each leaf in the enumeration;  $c$  is the number of classes.
- $\mathbf{v}_3 \in \{1, \dots, N(Z)\}^n$  is a vector that specifies the  $k$ -mer used by each inner node (rule) in the enumeration, based on its position in the concatenated sequence of all genomes in  $Z$ .

Any decision tree  $h$  can then be straightforwardly reconstructed from any compression set  $Z$  and any such message tuple.

To obtain a generalization error bound, we must also define a prior probability distribution  $P_Z(\sigma)$  over all possible values of  $\sigma$ , given a compression set  $Z$ . We start by attributing a probability of  $\xi(n)$  to the number of inner nodes. Thus,

$$P_Z(\sigma) = P_Z(\sigma|n) \cdot \xi(n), \quad (\text{S3})$$

which reflects our prior belief that smaller trees are more likely than large ones. We then assign equal probability to all messages specifying trees of  $n$  inner nodes:

$$P_Z(\sigma|n) = P_1(\mathbf{v}_1) \cdot P_2(\mathbf{v}_2) \cdot P_3(\mathbf{v}_3), \quad (\text{S4})$$

where  $P_1$ ,  $P_2$ , and  $P_3$  are chosen as follows. First,

$$P_1(\mathbf{v}_1) = \frac{1}{\binom{2n+1}{n}}, \quad (\text{S5})$$

which assigns equal probability to all vectors  $\mathbf{v}_1$  with  $n$  elements equal to 1 and  $n+1$  elements equal to 0. Then

$$P_2(\mathbf{v}_2) = \left(\frac{1}{c}\right)^{n+1}, \quad (\text{S6})$$

which assigns equal probability to each class for the  $n+1$  leaves. Finally,

$$P_3(\mathbf{v}_3) = \left(\frac{1}{N(Z)}\right)^n, \quad (\text{S7})$$

which assigns equal probability over all positions in the combined sequence of all genomes in  $Z$  for every inner node. Hence, we obtain a prior  $P_Z(\sigma)$ , where

$$P_Z(\sigma) = \frac{6}{\pi^2} (n+1)^{-2} \binom{2n+1}{n}^{-1} \left(\frac{1}{N(Z)}\right)^n \left(\frac{1}{c}\right)^{n+1}. \quad (\text{S8})$$

By inserting this prior  $P_Z(\sigma)$  into Equation S1, we obtain a sample compression risk bound  $\varepsilon_{\text{CART}}(h, S, \delta)$ , which valid for any decision tree  $h$  based on rules that detect the presence of  $k$ -mers:

$$\varepsilon_{\text{CART}}(h, S, \delta) = 1 - \exp\left(\frac{-1}{m - |Z| - r} \left[ \ln \binom{m}{|Z|} + \ln \binom{m - |Z|}{r} + \ln \binom{2n+1}{n} + n \cdot \ln(N(Z)) + (n+1) \ln(c) + \ln \left( \frac{\pi^6 (n+1)^2 (r+1)^2 (|Z|+1)^2}{216 \cdot \delta} \right) \right] \right). \quad (\text{S9})$$

In the main text, we use  $|h|$ , instead of  $n$ , for the number of rules (i.e., internal nodes) in the decision tree  $h$ .

## Related work on generalization bounds for decision trees

Several theoretical upper bounds on the risk of decision trees exist in the literature. Most of them are either based on the Vapnik-Chervonenkis dimension<sup>4</sup> (VC-dim) or the Rademacher complexity<sup>5</sup>. However, the tightness of these bounds is challenged in our setting due to the extremely high dimensionality of the input space. Given that our goal is to derive a generalization bound that is tight enough to guide model selection, including the pruning process of decision trees, such bounds are of limited interest. In fact, the VC-dim and Rademacher complexity are only defined for data-independent sets of classifiers. Given that we consider  $k$ -mers of length  $k = 31$ , we have to consider all decision trees of  $n$  nodes (for small  $n$ ) that can be constructed over  $d = 4^{31}$  boolean variables (i.e., the presence or absence of a  $k$ -mer). According to the recent work of Yıldız (2015)<sup>6</sup>, the VC-dim of decision trees of height  $p$  is at least  $2^{(p-1)}(1 + \lfloor \log_2(d - p + 2) \rfloor)$ . Since  $p$  is at least  $\log_2(n)$ , this gives a linear increase in  $n$  with a large multiplier, since  $d = 4^{31}$ . Similarly, bounds based on Rademacher complexities exhibit the same difficulties<sup>7</sup>.

One way to obtain tighter bounds for data-independent sets of classifiers is to use part of the training set to build the model and the remaining data to calculate a generalization bound. For instance, Kääriäinen et al. (2004)<sup>8</sup> use a fraction of the training set to build a (possibly very large) decision tree  $T$  and then use the remaining data to prune it based on the Rademacher complexity

of the set of subtrees of  $T$ . However, the problem with this approach is that fewer examples are used to grow the tree and then prune it.

Consequently, in order to use the full training set to grow and prune the tree, while achieving a tight bound, we have decided to investigate risk bounds for data-dependent sets of classifiers. Such sets of classifiers can be significantly more concise than their data-independent counterparts and thus, lead to tighter bounds. In our case, we consider the set of all decision trees composed exclusively of  $k$ -mers that are present in the data set (and not the full set of  $4^{31}$   $k$ -mers). In this sense, our best prospect was the sample compression bounds proposed by Floyd and Warmuth (1995)<sup>2</sup> and then later by Marchand and Sokolova (2005)<sup>3</sup> for conjunctions, disjunctions, and decision lists. Such bounds were recently explored by Drouin et al. (2016)<sup>9</sup> to obtain tight generalization bounds for conjunctions and disjunctions of  $k$ -mers learned using Set Covering Machines<sup>10</sup>. In the case of decision trees, the only sample compression bound that we are aware of is the one proposed by Shah (2007)<sup>11</sup>. However, this bound is too generic and no pruning algorithm based on it was ever proposed. Instead, following the work of Drouin et al. (2016)<sup>9</sup>, we have decided to propose a tighter bound, specialized to decision trees of  $k$ -mers, that takes into account the particularities of this representation, i.e., that  $k$ -mers are substrings of genome sequences.

In fact, the main difference between our bound and the one of Shah (2007)<sup>11</sup> is in the way that the decision tree is encoded into a compression set and a message string. In their bound, the  $k$ -mers are considered as generic features and the message string contains the index of the  $k$ -mer on which each rule (inner node) relies. The compression set serves only to specify each rule's threshold (i.e., 0 or 1) based on the value of the feature in the corresponding example. In contrast, we exploit the fact that the  $k$ -mers are substrings of genomes and define the compression set as being the smallest set of genomes that contains all the  $k$ -mers in the model. We then use the message string to specify the index of the  $k$ -mers in the concatenated sequences of the genomes of the compression set. We also account for the fact that multiple  $k$ -mers can be found in the same genome, which leads to smaller compression sets and thus a tighter bound.

More formally, for a decision tree with  $n$  inner nodes (rules) the bound of Shah (2007)<sup>11</sup> contains an additive term of  $n \cdot \ln(d)$ , where  $d$  is the total number of  $k$ -mers (i.e.,  $4^k$ ), whereas, in our bound, this term is replaced by  $n \cdot \ln(N(Z))$ , where  $N(Z)$  is the number of nucleotides in all the genomes of the compression set. Given that  $|Z| \leq n$  and that we seek simple trees with few inner nodes (i.e., small  $n$ ),  $N(Z)$  is of the order of a few millions and is bound to be smaller than the total number of  $k$ -mers ( $d$ ) when  $k$  is sufficiently large (e.g., for  $k = 31$ ,  $d = 4^k \approx 4.6116e18$ ), resulting in a tighter bound.

## Supplementary figures

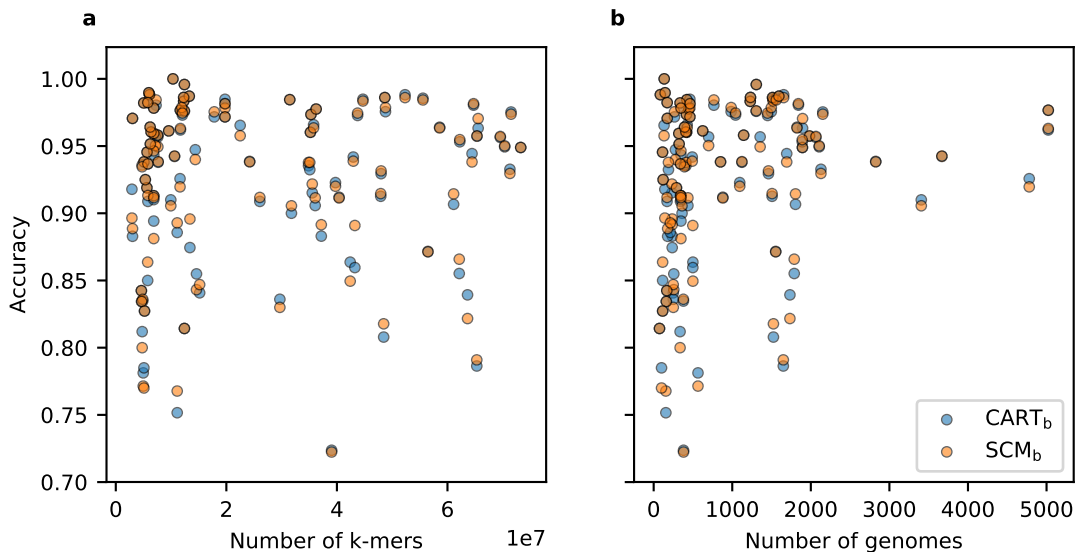

**Figure S1.** Accuracy of the  $CART_b$  and  $SCM_b$  models with respect to a) the number of  $k$ -mers and b) the number of genomes in each of the 107 datasets (shown as dots). Clearly, small numbers of genomes are not associated with poor accuracies. The same is true for large numbers of  $k$ -mers. These results emphasize the ability of these algorithms to achieve good generalization despite small samples sizes and extremely high dimensional data.

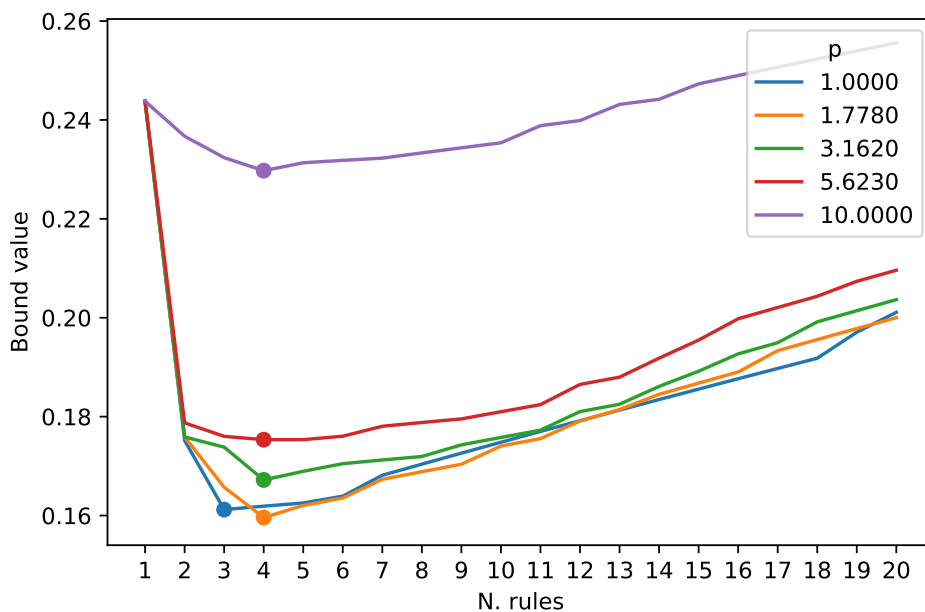

**Figure S2.** Value of the sample compression bound of the  $SCM_b$  algorithm (Equation (2)) with respect to the number of rules in the model for the *M. tuberculosis* benchmark dataset. Each of the colored lines corresponds to a different value of the  $p$  hyperparameter, which controls the importance of the positive and negative classes in the greedy optimization algorithm (see Marchand and Shawe-Taylor (2002)<sup>10</sup>). The minimum of each line is marked by a dot. For clarity, we only show results for disjunction models (logical-OR). Clearly, there is a well-distinguishable set of hyperparameter values that yield a smaller bound value than the others and the bound allows for model selection.

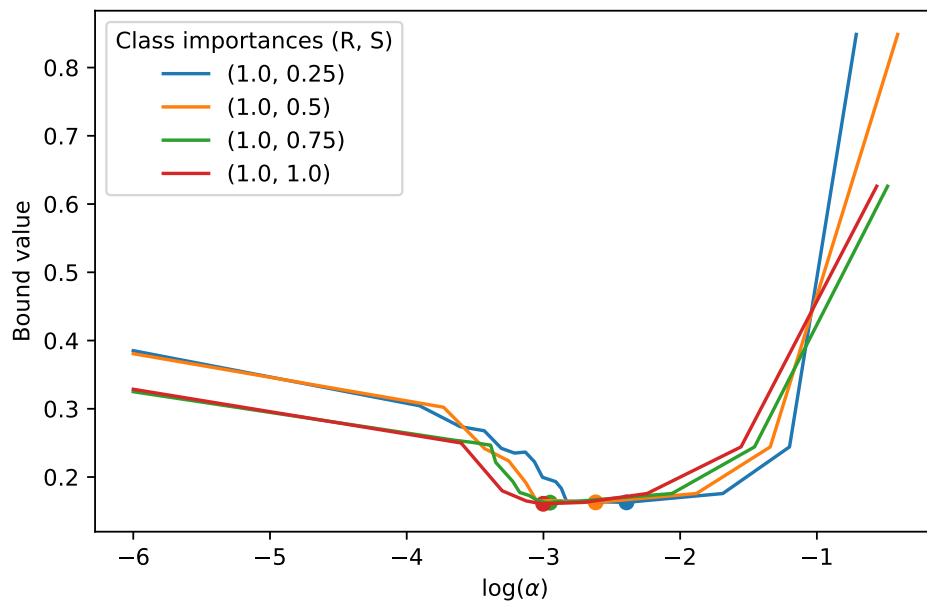

**Figure S3.** Value of the sample compression bound of the  $CART_b$  algorithm (Equation (3)) with respect to the alpha hyperparameter of the minimum cost-complexity pruning algorithm of Breiman et al. (1984)<sup>12</sup>, which controls the size of the resulting tree, for the *M. tuberculosis* benchmark dataset. Each of the colored lines corresponds to a different class importance ratio, which serves to increase the importance of making errors on any of the classes. The minimum of each line is marked by a dot. For clarity, we only show results while varying the importance of the susceptible (S) class. Clearly, there is a well-distinguishable set of hyperparameter values that yield a smaller bound value than the others and the bound allows for model selection.

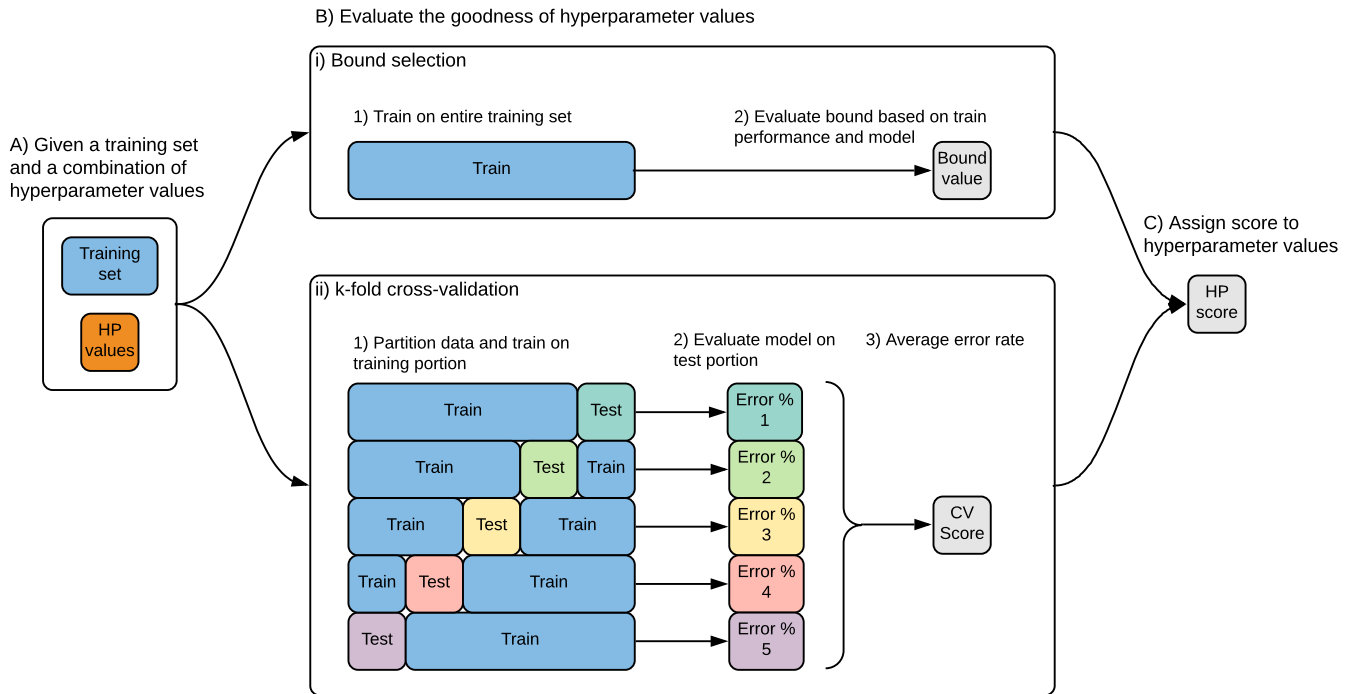

**Figure S4.** Illustration of the bound selection and cross-validation model selection methods. A) Both methods are given a combination of hyperparameter values to score, as well as a set of training data. B) The methods differ in the strategy that they use to compute a score. (i) Bound selection trains the algorithm on the entire training set and scores the hyperparameters based on the expression of a generalization bound. In this study, the bound depends on some properties of the model (e.g., complexity) and its performance on the training data (e.g., number of prediction errors). This requires a single training of the algorithm and all the data is used for training. (ii) In contrast,  $k$ -fold cross-validation creates  $k$  partitions of the data and trains  $k$  distinct models that are evaluated on  $k$  testing sets (folds). This approach is less computationally efficient than bound selection and requires that some data be left out for testing. C) The score estimated by both methods is assigned to the combination of hyperparameter values and the combination with the best score (e.g., minimum value) is retained.

## Supplementary tables

**Table S1.** Detailed results for all datasets and the methods compared in Table 2 and Supplementary Table S2. For each dataset (species-antibiotic pair), the number of genomes (total, resistant, and susceptible) and  $k$ -mers is shown, along with the accuracy, sensitivity, specificity, F1 score, and the complexity of the models learned by each algorithm (average  $\pm$  standard deviation for ten repetitions – see main text). The complexity is the number of  $k$ -mers used by the models, with all\* indicating that feature selection was performed (see main text) and that the one million selected features were used. Missing F1 score values indicate that, in at least one repetition, the value of this metric was *nan* or infinite, which (in our case) can occur if no examples are predicted as positive or there are no true positive predictions.

| Species             | Antibiotic         | Genomes                             | Resistant                           | Susceptible       | $k$ -mers<br>(millions)             | Method               | Accuracy                            | Sensitivity                         | Specificity                         | F1 score                            | Complexity          |                                     |                                     |                                     |                                     |                         |
|---------------------|--------------------|-------------------------------------|-------------------------------------|-------------------|-------------------------------------|----------------------|-------------------------------------|-------------------------------------|-------------------------------------|-------------------------------------|---------------------|-------------------------------------|-------------------------------------|-------------------------------------|-------------------------------------|-------------------------|
| <i>A. baumannii</i> | amikacin           | 256                                 | 195                                 | 61                | 14.6                                | L1-logistic          | 0.835 $\pm$ 0.064                   | 0.880 $\pm$ 0.072                   | 0.663 $\pm$ 0.192                   | 0.893 $\pm$ 0.048                   | 4575.7 $\pm$ 6046.6 |                                     |                                     |                                     |                                     |                         |
|                     |                    |                                     |                                     |                   |                                     | L2-logistic          | <b>0.861 <math>\pm</math> 0.051</b> | 0.890 $\pm$ 0.058                   | <b>0.740 <math>\pm</math> 0.155</b> | <b>0.909 <math>\pm</math> 0.038</b> | all*                |                                     |                                     |                                     |                                     |                         |
|                     |                    |                                     |                                     |                   |                                     | Majority             | 0.790 $\pm$ 0.045                   | <b>1.000 <math>\pm</math> 0.000</b> | 0.000 $\pm$ 0.000                   | 0.882 $\pm$ 0.029                   | –                   |                                     |                                     |                                     |                                     |                         |
|                     |                    |                                     |                                     |                   |                                     | Naive Bayes          | 0.725 $\pm$ 0.049                   | 0.780 $\pm$ 0.051                   | 0.533 $\pm$ 0.095                   | 0.817 $\pm$ 0.036                   | all                 |                                     |                                     |                                     |                                     |                         |
|                     |                    |                                     |                                     |                   |                                     | Poly-SVM             | <b>0.865 <math>\pm</math> 0.051</b> | 0.902 $\pm$ 0.056                   | 0.717 $\pm$ 0.173                   | <b>0.912 <math>\pm</math> 0.038</b> | all                 |                                     |                                     |                                     |                                     |                         |
|                     |                    |                                     |                                     |                   |                                     | RBF-SVM              | 0.851 $\pm$ 0.069                   | 0.902 $\pm$ 0.058                   | 0.660 $\pm$ 0.170                   | 0.904 $\pm$ 0.048                   | all                 |                                     |                                     |                                     |                                     |                         |
|                     |                    |                                     |                                     |                   |                                     | Random Forests       | 0.843 $\pm$ 0.054                   | 0.895 $\pm$ 0.060                   | 0.635 $\pm$ 0.112                   | 0.899 $\pm$ 0.039                   | 6762.8 $\pm$ 7422.5 |                                     |                                     |                                     |                                     |                         |
|                     |                    |                                     |                                     |                   |                                     | CART <sub>b</sub>    | 0.855 $\pm$ 0.041                   | 0.898 $\pm$ 0.037                   | 0.698 $\pm$ 0.179                   | <b>0.907 <math>\pm</math> 0.027</b> | 2.5 $\pm$ 0.5       |                                     |                                     |                                     |                                     |                         |
|                     |                    |                                     |                                     |                   |                                     | CART <sub>cv</sub>   | <b>0.867 <math>\pm</math> 0.041</b> | 0.905 $\pm$ 0.045                   | 0.719 $\pm$ 0.188                   | <b>0.914 <math>\pm</math> 0.029</b> | 4.1 $\pm$ 1.7       |                                     |                                     |                                     |                                     |                         |
|                     |                    |                                     |                                     |                   |                                     | SCM <sub>b</sub>     | 0.843 $\pm$ 0.044                   | 0.878 $\pm$ 0.035                   | 0.725 $\pm$ 0.129                   | 0.898 $\pm$ 0.032                   | 2.1 $\pm$ 0.3       |                                     |                                     |                                     |                                     |                         |
|                     |                    |                                     |                                     |                   |                                     | SCM <sub>cv</sub>    | 0.837 $\pm$ 0.043                   | 0.886 $\pm$ 0.048                   | 0.615 $\pm$ 0.228                   | 0.895 $\pm$ 0.030                   | 5.5 $\pm$ 2.6       |                                     |                                     |                                     |                                     |                         |
|                     |                    |                                     |                                     |                   |                                     | ampicillin/sulbactam | 155                                 | 111                                 | 44                                  | 11.1                                | L1-logistic         | 0.823 $\pm$ 0.067                   | 0.842 $\pm$ 0.075                   | <b>0.756 <math>\pm</math> 0.190</b> | 0.876 $\pm$ 0.046                   | 106216.1 $\pm$ 233553.8 |
|                     | L2-logistic        | 0.835 $\pm$ 0.056                   | 0.867 $\pm$ 0.069                   | 0.743 $\pm$ 0.160 | 0.887 $\pm$ 0.039                   |                      |                                     |                                     |                                     |                                     | all*                |                                     |                                     |                                     |                                     |                         |
|                     | Majority           | 0.748 $\pm$ 0.042                   | <b>1.000 <math>\pm</math> 0.000</b> | 0.000 $\pm$ 0.000 | 0.855 $\pm$ 0.028                   |                      |                                     |                                     |                                     |                                     | –                   |                                     |                                     |                                     |                                     |                         |
|                     | Naive Bayes        | 0.797 $\pm$ 0.071                   | 0.902 $\pm$ 0.082                   | 0.492 $\pm$ 0.175 | 0.868 $\pm$ 0.050                   |                      |                                     |                                     |                                     |                                     | all                 |                                     |                                     |                                     |                                     |                         |
|                     | Poly-SVM           | 0.829 $\pm$ 0.053                   | 0.867 $\pm$ 0.059                   | 0.722 $\pm$ 0.140 | 0.883 $\pm$ 0.040                   |                      |                                     |                                     |                                     |                                     | all                 |                                     |                                     |                                     |                                     |                         |
|                     | RBF-SVM            | <b>0.848 <math>\pm</math> 0.034</b> | 0.893 $\pm$ 0.063                   | 0.706 $\pm$ 0.187 | <b>0.898 <math>\pm</math> 0.024</b> |                      |                                     |                                     |                                     |                                     | all                 |                                     |                                     |                                     |                                     |                         |
|                     | Random Forests     | <b>0.839 <math>\pm</math> 0.059</b> | 0.881 $\pm$ 0.081                   | 0.706 $\pm$ 0.135 | <b>0.890 <math>\pm</math> 0.042</b> |                      |                                     |                                     |                                     |                                     | 1910.0 $\pm$ 3035.0 |                                     |                                     |                                     |                                     |                         |
|                     | CART <sub>b</sub>  | 0.752 $\pm$ 0.046                   | 0.811 $\pm$ 0.076                   | 0.586 $\pm$ 0.285 | 0.830 $\pm$ 0.030                   |                      |                                     |                                     |                                     |                                     | 1.0 $\pm$ 0.0       |                                     |                                     |                                     |                                     |                         |
|                     | CART <sub>cv</sub> | 0.810 $\pm$ 0.084                   | 0.846 $\pm$ 0.100                   | 0.707 $\pm$ 0.141 | 0.867 $\pm$ 0.063                   |                      |                                     |                                     |                                     |                                     | 7.3 $\pm$ 2.9       |                                     |                                     |                                     |                                     |                         |
|                     | SCM <sub>b</sub>   | 0.768 $\pm$ 0.060                   | 0.841 $\pm$ 0.073                   | 0.562 $\pm$ 0.227 | 0.843 $\pm$ 0.042                   |                      |                                     |                                     |                                     |                                     | 1.0 $\pm$ 0.0       |                                     |                                     |                                     |                                     |                         |
|                     | SCM <sub>cv</sub>  | 0.787 $\pm$ 0.049                   | 0.842 $\pm$ 0.067                   | 0.624 $\pm$ 0.218 | 0.855 $\pm$ 0.031                   |                      |                                     |                                     |                                     |                                     | 5.6 $\pm$ 2.4       |                                     |                                     |                                     |                                     |                         |
|                     | carbapenem         | 232                                 | 122                                 | 110               | 35.5                                |                      |                                     |                                     |                                     |                                     | L1-logistic         | 0.943 $\pm$ 0.040                   | 0.937 $\pm$ 0.043                   | 0.948 $\pm$ 0.047                   | 0.949 $\pm$ 0.037                   | 1075.4 $\pm$ 627.9      |
|                     |                    |                                     |                                     |                   |                                     |                      |                                     |                                     |                                     |                                     | L2-logistic         | 0.943 $\pm$ 0.046                   | 0.945 $\pm$ 0.048                   | 0.942 $\pm$ 0.049                   | 0.950 $\pm$ 0.038                   | all*                    |
|                     |                    |                                     |                                     |                   |                                     |                      |                                     |                                     |                                     |                                     | Majority            | 0.520 $\pm$ 0.094                   | 0.900 $\pm$ 0.316                   | 0.100 $\pm$ 0.316                   | –                                   | –                       |
|                     |                    |                                     |                                     |                   |                                     |                      |                                     |                                     |                                     |                                     | Naive Bayes         | 0.904 $\pm$ 0.026                   | <b>0.977 <math>\pm</math> 0.032</b> | 0.810 $\pm$ 0.056                   | 0.918 $\pm$ 0.025                   | all                     |
|                     |                    |                                     |                                     |                   |                                     |                      |                                     |                                     |                                     |                                     | Poly-SVM            | 0.948 $\pm$ 0.040                   | 0.949 $\pm$ 0.046                   | 0.940 $\pm$ 0.055                   | 0.954 $\pm$ 0.036                   | all                     |
|                     |                    |                                     |                                     |                   |                                     |                      |                                     |                                     |                                     |                                     | RBF-SVM             | 0.946 $\pm$ 0.039                   | 0.945 $\pm$ 0.050                   | 0.946 $\pm$ 0.042                   | 0.950 $\pm$ 0.035                   | all                     |
|                     |                    |                                     |                                     |                   |                                     |                      |                                     |                                     |                                     |                                     | Random Forests      | <b>0.965 <math>\pm</math> 0.031</b> | <b>0.968 <math>\pm</math> 0.038</b> | <b>0.958 <math>\pm</math> 0.047</b> | <b>0.969 <math>\pm</math> 0.029</b> | 1637.7 $\pm$ 2268.4     |
|                     |                    |                                     |                                     |                   |                                     | CART <sub>b</sub>    | 0.915 $\pm$ 0.052                   | 0.905 $\pm$ 0.054                   | 0.925 $\pm$ 0.078                   | 0.922 $\pm$ 0.049                   | 2.0 $\pm$ 0.0       |                                     |                                     |                                     |                                     |                         |
|                     |                    |                                     |                                     |                   |                                     | CART <sub>cv</sub>   | 0.915 $\pm$ 0.054                   | 0.918 $\pm$ 0.061                   | 0.910 $\pm$ 0.070                   | 0.923 $\pm$ 0.049                   | 2.2 $\pm$ 1.5       |                                     |                                     |                                     |                                     |                         |
|                     |                    |                                     |                                     |                   |                                     | SCM <sub>b</sub>     | 0.922 $\pm$ 0.047                   | 0.914 $\pm$ 0.042                   | 0.929 $\pm$ 0.078                   | 0.929 $\pm$ 0.041                   | 2.0 $\pm$ 0.0       |                                     |                                     |                                     |                                     |                         |
|                     |                    |                                     |                                     |                   |                                     | SCM <sub>cv</sub>    | 0.924 $\pm$ 0.040                   | 0.917 $\pm$ 0.050                   | 0.923 $\pm$ 0.062                   | 0.928 $\pm$ 0.040                   | 3.5 $\pm$ 1.1       |                                     |                                     |                                     |                                     |                         |
|                     |                    |                                     |                                     |                   |                                     | ceftazidime          | 277                                 | 249                                 | 28                                  | 14.4                                | L1-logistic         | <b>0.944 <math>\pm</math> 0.034</b> | 0.990 $\pm$ 0.017                   | 0.511 $\pm$ 0.288                   | <b>0.969 <math>\pm</math> 0.018</b> | 153574.8 $\pm$ 295176.4 |
|                     | L2-logistic        | 0.927 $\pm$ 0.049                   | 0.968 $\pm$ 0.047                   | 0.548 $\pm$ 0.310 | 0.960 $\pm$ 0.029                   |                      |                                     |                                     |                                     |                                     | all*                |                                     |                                     |                                     |                                     |                         |
|                     | Majority           | 0.907 $\pm$ 0.035                   | <b>1.000 <math>\pm</math> 0.000</b> | 0.000 $\pm$ 0.000 | 0.951 $\pm$ 0.019                   |                      |                                     |                                     |                                     |                                     | –                   |                                     |                                     |                                     |                                     |                         |
| Naive Bayes         | 0.871 $\pm$ 0.039  | 0.858 $\pm$ 0.041                   | <b>1.000 <math>\pm</math> 0.000</b> | 0.923 $\pm$ 0.024 | all                                 |                      |                                     |                                     |                                     |                                     |                     |                                     |                                     |                                     |                                     |                         |

Continued on next page

**Table S1.** (Continued)

| Species            | Antibiotic           | Genomes              | Resistant            | Susceptible          | <i>k</i> -mers<br>(millions) | Method               | Accuracy             | Sensitivity          | Specificity          | F1 score           | Complexity      |               |                      |               |                     |
|--------------------|----------------------|----------------------|----------------------|----------------------|------------------------------|----------------------|----------------------|----------------------|----------------------|--------------------|-----------------|---------------|----------------------|---------------|---------------------|
| imipenem           | 499                  | 325                  | 174                  | 42.4                 | Poly-SVM                     | <b>0.942 ± 0.032</b> | 0.982 ± 0.029        | 0.562 ± 0.284        | <b>0.968 ± 0.017</b> | all                |                 |               |                      |               |                     |
|                    |                      |                      |                      |                      | RBF-SVM                      | <b>0.942 ± 0.033</b> | 0.980 ± 0.030        | 0.577 ± 0.289        | <b>0.968 ± 0.018</b> | all                |                 |               |                      |               |                     |
|                    |                      |                      |                      |                      | Random Forests               | 0.940 ± 0.021        | 0.982 ± 0.022        | 0.546 ± 0.260        | <b>0.967 ± 0.012</b> | 1389.7 ± 2594.2    |                 |               |                      |               |                     |
|                    |                      |                      |                      |                      | CART <sub>b</sub>            | <b>0.947 ± 0.026</b> | 0.984 ± 0.022        | 0.593 ± 0.229        | <b>0.971 ± 0.014</b> | 1.1 ± 0.3          |                 |               |                      |               |                     |
|                    |                      |                      |                      |                      | CART <sub>cv</sub>           | <b>0.951 ± 0.047</b> | 0.974 ± 0.042        | 0.736 ± 0.280        | <b>0.973 ± 0.027</b> | 2.3 ± 1.3          |                 |               |                      |               |                     |
|                    |                      |                      |                      |                      | SCM <sub>b</sub>             | 0.940 ± 0.043        | 0.976 ± 0.043        | 0.593 ± 0.229        | <b>0.967 ± 0.024</b> | 1.2 ± 0.4          |                 |               |                      |               |                     |
|                    |                      |                      |                      |                      | SCM <sub>cv</sub>            | 0.935 ± 0.042        | 0.967 ± 0.042        | 0.660 ± 0.277        | <b>0.964 ± 0.024</b> | 1.7 ± 1.1          |                 |               |                      |               |                     |
|                    |                      |                      |                      |                      | L1-logistic                  | 0.880 ± 0.029        | 0.915 ± 0.031        | 0.819 ± 0.059        | 0.907 ± 0.025        | 3980.5 ± 4676.0    |                 |               |                      |               |                     |
|                    |                      |                      |                      |                      | L2-logistic                  | <b>0.885 ± 0.034</b> | 0.906 ± 0.038        | <b>0.851 ± 0.070</b> | <b>0.909 ± 0.029</b> | all*               |                 |               |                      |               |                     |
|                    |                      |                      |                      |                      | Majority                     | 0.644 ± 0.037        | <b>1.000 ± 0.000</b> | 0.000 ± 0.000        | 0.783 ± 0.028        | –                  |                 |               |                      |               |                     |
|                    |                      |                      |                      |                      | Naive Bayes                  | 0.822 ± 0.027        | 0.912 ± 0.031        | 0.661 ± 0.057        | 0.868 ± 0.023        | all                |                 |               |                      |               |                     |
|                    |                      |                      |                      |                      | Poly-SVM                     | <b>0.886 ± 0.031</b> | 0.917 ± 0.028        | 0.832 ± 0.072        | <b>0.912 ± 0.024</b> | all                |                 |               |                      |               |                     |
|                    |                      |                      |                      |                      | RBF-SVM                      | 0.880 ± 0.031        | 0.912 ± 0.041        | 0.824 ± 0.063        | 0.907 ± 0.024        | all                |                 |               |                      |               |                     |
|                    |                      |                      |                      |                      | Random Forests               | <b>0.892 ± 0.024</b> | 0.937 ± 0.023        | 0.812 ± 0.052        | <b>0.917 ± 0.020</b> | 6314.6 ± 7055.6    |                 |               |                      |               |                     |
|                    |                      |                      |                      |                      | CART <sub>b</sub>            | 0.864 ± 0.042        | 0.915 ± 0.039        | 0.773 ± 0.110        | 0.896 ± 0.032        | 3.4 ± 0.7          |                 |               |                      |               |                     |
|                    |                      |                      |                      |                      | CART <sub>cv</sub>           | 0.863 ± 0.041        | 0.910 ± 0.035        | 0.780 ± 0.085        | 0.894 ± 0.033        | 9.6 ± 5.0          |                 |               |                      |               |                     |
|                    |                      |                      |                      |                      | SCM <sub>b</sub>             | 0.849 ± 0.031        | 0.926 ± 0.020        | 0.711 ± 0.078        | 0.888 ± 0.023        | 2.7 ± 0.5          |                 |               |                      |               |                     |
|                    |                      |                      |                      |                      | SCM <sub>cv</sub>            | 0.857 ± 0.039        | 0.912 ± 0.046        | 0.759 ± 0.075        | 0.890 ± 0.033        | 10.6 ± 5.2         |                 |               |                      |               |                     |
|                    |                      |                      |                      |                      | meropenem                    | 236                  | 203                  | 33                   | 13.4                 | L1-logistic        | 0.896 ± 0.048   | 0.933 ± 0.042 | <b>0.628 ± 0.208</b> | 0.940 ± 0.028 | 167820.2 ± 298168.7 |
|                    |                      |                      |                      |                      |                              |                      |                      |                      |                      | L2-logistic        | 0.887 ± 0.049   | 0.932 ± 0.046 | 0.560 ± 0.240        | 0.935 ± 0.030 | all*                |
| Majority           | 0.881 ± 0.025        | <b>1.000 ± 0.000</b> | 0.000 ± 0.000        | 0.936 ± 0.014        |                              |                      |                      |                      |                      | –                  |                 |               |                      |               |                     |
| Naive Bayes        | 0.791 ± 0.048        | 0.836 ± 0.054        | 0.451 ± 0.269        | 0.876 ± 0.030        |                              |                      |                      |                      |                      | all                |                 |               |                      |               |                     |
| Poly-SVM           | 0.900 ± 0.050        | 0.945 ± 0.019        | 0.580 ± 0.364        | 0.944 ± 0.027        |                              |                      |                      |                      |                      | all                |                 |               |                      |               |                     |
| RBF-SVM            | 0.906 ± 0.042        | 0.954 ± 0.021        | 0.566 ± 0.355        | <b>0.948 ± 0.022</b> |                              |                      |                      |                      |                      | all                |                 |               |                      |               |                     |
| Random Forests     | <b>0.921 ± 0.027</b> | 0.974 ± 0.017        | 0.541 ± 0.269        | <b>0.956 ± 0.014</b> |                              |                      |                      |                      |                      | 2282.4 ± 3017.3    |                 |               |                      |               |                     |
| CART <sub>b</sub>  | 0.874 ± 0.032        | 0.964 ± 0.040        | 0.245 ± 0.334        | 0.931 ± 0.017        |                              |                      |                      |                      |                      | 0.9 ± 0.9          |                 |               |                      |               |                     |
| CART <sub>cv</sub> | 0.900 ± 0.032        | 0.943 ± 0.036        | 0.583 ± 0.220        | 0.943 ± 0.018        |                              |                      |                      |                      |                      | 6.5 ± 2.9          |                 |               |                      |               |                     |
| SCM <sub>b</sub>   | 0.896 ± 0.038        | 0.947 ± 0.029        | 0.499 ± 0.327        | 0.941 ± 0.021        |                              |                      |                      |                      |                      | 1.5 ± 0.5          |                 |               |                      |               |                     |
| SCM <sub>cv</sub>  | 0.889 ± 0.036        | 0.943 ± 0.041        | 0.507 ± 0.255        | 0.938 ± 0.020        |                              |                      |                      |                      |                      | 4.5 ± 2.5          |                 |               |                      |               |                     |
| L1-logistic        | 0.863 ± 0.019        | 0.905 ± 0.047        | 0.648 ± 0.159        | 0.918 ± 0.012        |                              |                      |                      |                      |                      | 70944.3 ± 159229.9 |                 |               |                      |               |                     |
| L2-logistic        | 0.857 ± 0.049        | 0.882 ± 0.063        | <b>0.741 ± 0.140</b> | 0.912 ± 0.030        |                              |                      |                      |                      |                      | all*               |                 |               |                      |               |                     |
| Majority           | 0.849 ± 0.034        | <b>1.000 ± 0.000</b> | 0.000 ± 0.000        | 0.918 ± 0.020        |                              |                      |                      |                      |                      | –                  |                 |               |                      |               |                     |
| Naive Bayes        | 0.733 ± 0.049        | 0.784 ± 0.067        | 0.457 ± 0.208        | 0.831 ± 0.038        |                              |                      |                      |                      |                      | all                |                 |               |                      |               |                     |
| Poly-SVM           | <b>0.873 ± 0.054</b> | 0.921 ± 0.055        | 0.606 ± 0.226        | <b>0.925 ± 0.032</b> |                              |                      |                      |                      |                      | all                |                 |               |                      |               |                     |
| RBF-SVM            | <b>0.873 ± 0.043</b> | 0.935 ± 0.051        | 0.520 ± 0.177        | <b>0.926 ± 0.027</b> |                              |                      |                      |                      |                      | all                |                 |               |                      |               |                     |
| Random Forests     | <b>0.882 ± 0.039</b> | 0.945 ± 0.039        | 0.539 ± 0.183        | <b>0.931 ± 0.024</b> |                              |                      |                      |                      |                      | 1034.8 ± 901.9     |                 |               |                      |               |                     |
| CART <sub>b</sub>  | 0.841 ± 0.041        | 0.936 ± 0.050        | 0.342 ± 0.307        | 0.909 ± 0.024        |                              |                      |                      |                      |                      | 1.5 ± 0.7          |                 |               |                      |               |                     |
| CART <sub>cv</sub> | 0.841 ± 0.051        | 0.881 ± 0.059        | 0.627 ± 0.138        | 0.903 ± 0.032        |                              |                      |                      |                      |                      | 6.8 ± 2.3          |                 |               |                      |               |                     |
| SCM <sub>b</sub>   | 0.847 ± 0.040        | 0.924 ± 0.042        | 0.441 ± 0.272        | 0.911 ± 0.023        | 1.7 ± 0.5                    |                      |                      |                      |                      |                    |                 |               |                      |               |                     |
| SCM <sub>cv</sub>  | 0.841 ± 0.049        | 0.871 ± 0.061        | 0.698 ± 0.187        | 0.902 ± 0.031        | 6.0 ± 2.9                    |                      |                      |                      |                      |                    |                 |               |                      |               |                     |
| <i>E. coli</i>     | amoxicillin          | 1095                 | 661                  | 434                  | 39.7                         | L1-logistic          | 0.900 ± 0.029        | 0.874 ± 0.028        | 0.942 ± 0.054        | 0.914 ± 0.026      | 1861.0 ± 4505.5 |               |                      |               |                     |
|                    |                      |                      |                      |                      |                              | L2-logistic          | 0.888 ± 0.022        | 0.873 ± 0.028        | 0.912 ± 0.040        | 0.905 ± 0.020      | all*            |               |                      |               |                     |
|                    |                      |                      |                      |                      |                              | Majority             | 0.614 ± 0.025        | <b>1.000 ± 0.000</b> | 0.000 ± 0.000        | 0.761 ± 0.020      | –               |               |                      |               |                     |
|                    |                      |                      |                      |                      |                              | Naive Bayes          | 0.603 ± 0.025        | 0.552 ± 0.025        | 0.685 ± 0.043        | 0.630 ± 0.027      | all             |               |                      |               |                     |
|                    |                      |                      |                      |                      |                              | Poly-SVM             | 0.869 ± 0.032        | 0.888 ± 0.029        | 0.842 ± 0.058        | 0.893 ± 0.027      | all             |               |                      |               |                     |

Continued on next page



**Table S1.** (Continued)

| Species                     | Antibiotic           | Genomes              | Resistant            | Susceptible   | <i>k</i> -mers<br>(millions) | Method               | Accuracy             | Sensitivity          | Specificity          | F1 score          | Complexity    |
|-----------------------------|----------------------|----------------------|----------------------|---------------|------------------------------|----------------------|----------------------|----------------------|----------------------|-------------------|---------------|
| amoxicillin/clavulanic acid | 1524                 | 464                  | 1060                 | 48.5          | RBF-SVM                      | 0.864 ± 0.039        | 0.878 ± 0.034        | 0.844 ± 0.054        | 0.888 ± 0.034        | all               |               |
|                             |                      |                      |                      |               | Random Forests               | 0.909 ± 0.022        | 0.893 ± 0.026        | 0.934 ± 0.029        | 0.923 ± 0.019        | 17109.2 ± 13709.9 |               |
|                             |                      |                      |                      |               | CART <sub>b</sub>            | <b>0.923 ± 0.018</b> | 0.891 ± 0.026        | <b>0.973 ± 0.011</b> | <b>0.934 ± 0.016</b> | 3.6 ± 0.5         |               |
|                             |                      |                      |                      |               | CART <sub>cv</sub>           | <b>0.919 ± 0.022</b> | 0.889 ± 0.024        | <b>0.966 ± 0.027</b> | <b>0.930 ± 0.019</b> | 4.1 ± 1.7         |               |
|                             |                      |                      |                      |               | SCM <sub>b</sub>             | <b>0.920 ± 0.016</b> | 0.893 ± 0.025        | 0.962 ± 0.014        | <b>0.932 ± 0.015</b> | 4.1 ± 0.7         |               |
|                             |                      |                      |                      |               | SCM <sub>cv</sub>            | <b>0.920 ± 0.021</b> | 0.891 ± 0.023        | <b>0.966 ± 0.028</b> | <b>0.932 ± 0.019</b> | 4.0 ± 1.2         |               |
|                             |                      |                      |                      |               | L1-logistic                  | 0.792 ± 0.018        | <b>0.746 ± 0.075</b> | 0.812 ± 0.026        | <b>0.683 ± 0.040</b> | 3727.2 ± 5890.3   |               |
|                             |                      |                      |                      |               | L2-logistic                  | 0.789 ± 0.022        | 0.684 ± 0.078        | 0.835 ± 0.042        | 0.661 ± 0.035        | all*              |               |
|                             |                      |                      |                      |               | Majority                     | 0.697 ± 0.014        | 0.000 ± 0.000        | <b>1.000 ± 0.000</b> | –                    | –                 |               |
|                             |                      |                      |                      |               | Naive Bayes                  | 0.634 ± 0.026        | 0.596 ± 0.035        | 0.652 ± 0.054        | 0.497 ± 0.017        | all               |               |
|                             |                      |                      |                      |               | Poly-SVM                     | 0.779 ± 0.022        | 0.604 ± 0.070        | 0.856 ± 0.020        | 0.622 ± 0.043        | all               |               |
|                             |                      |                      |                      |               | RBF-SVM                      | 0.776 ± 0.021        | 0.597 ± 0.073        | 0.855 ± 0.016        | 0.616 ± 0.046        | all               |               |
|                             |                      |                      |                      |               | Random Forests               | 0.812 ± 0.021        | 0.598 ± 0.060        | 0.906 ± 0.023        | 0.657 ± 0.037        | 39289.6 ± 29690.9 |               |
|                             |                      |                      |                      |               | CART <sub>b</sub>            | 0.808 ± 0.021        | 0.563 ± 0.075        | 0.915 ± 0.041        | 0.638 ± 0.040        | 7.0 ± 0.7         |               |
|                             |                      |                      |                      |               | CART <sub>cv</sub>           | 0.812 ± 0.019        | 0.533 ± 0.101        | 0.933 ± 0.052        | 0.627 ± 0.047        | 13.3 ± 7.7        |               |
| ampicillin                  | 436                  | 271                  | 165                  | 36.1          | SCM <sub>b</sub>             | 0.818 ± 0.019        | 0.464 ± 0.050        | 0.972 ± 0.014        | 0.606 ± 0.041        | 4.6 ± 1.1         |               |
|                             |                      |                      |                      |               | SCM <sub>cv</sub>            | <b>0.830 ± 0.023</b> | 0.467 ± 0.059        | 0.988 ± 0.010        | 0.623 ± 0.054        | 6.2 ± 1.9         |               |
|                             |                      |                      |                      |               | L1-logistic                  | <b>0.926 ± 0.029</b> | 0.905 ± 0.052        | <b>0.964 ± 0.031</b> | <b>0.937 ± 0.027</b> | 3006.9 ± 2011.3   |               |
|                             |                      |                      |                      |               | L2-logistic                  | 0.908 ± 0.038        | 0.900 ± 0.051        | 0.920 ± 0.049        | 0.922 ± 0.034        | all*              |               |
|                             |                      |                      |                      |               | Majority                     | 0.610 ± 0.040        | <b>1.000 ± 0.000</b> | 0.000 ± 0.000        | 0.757 ± 0.031        | –                 |               |
|                             |                      |                      |                      |               | Naive Bayes                  | 0.629 ± 0.036        | 0.615 ± 0.058        | 0.651 ± 0.075        | 0.668 ± 0.035        | all               |               |
|                             |                      |                      |                      |               | Poly-SVM                     | 0.826 ± 0.029        | 0.839 ± 0.046        | 0.808 ± 0.035        | 0.855 ± 0.025        | all               |               |
|                             |                      |                      |                      |               | RBF-SVM                      | 0.824 ± 0.027        | 0.839 ± 0.040        | 0.803 ± 0.042        | 0.853 ± 0.023        | all               |               |
|                             |                      |                      |                      |               | Random Forests               | 0.923 ± 0.042        | 0.913 ± 0.051        | 0.938 ± 0.051        | <b>0.935 ± 0.038</b> | 2720.0 ± 6356.9   |               |
|                             |                      |                      |                      |               | CART <sub>b</sub>            | 0.906 ± 0.037        | 0.902 ± 0.044        | 0.910 ± 0.062        | 0.921 ± 0.033        | 2.2 ± 0.6         |               |
|                             |                      |                      |                      |               | CART <sub>cv</sub>           | 0.916 ± 0.036        | 0.912 ± 0.042        | 0.922 ± 0.065        | 0.930 ± 0.029        | 3.1 ± 1.7         |               |
|                             |                      |                      |                      |               | SCM <sub>b</sub>             | 0.911 ± 0.040        | 0.912 ± 0.048        | 0.911 ± 0.063        | 0.926 ± 0.035        | 2.2 ± 0.6         |               |
|                             |                      |                      |                      |               | SCM <sub>cv</sub>            | <b>0.933 ± 0.040</b> | 0.933 ± 0.043        | 0.936 ± 0.065        | <b>0.944 ± 0.033</b> | 3.5 ± 1.4         |               |
|                             |                      |                      |                      |               | L1-logistic                  | <b>0.954 ± 0.011</b> | 0.673 ± 0.148        | 0.984 ± 0.010        | 0.725 ± 0.088        | 13896.1 ± 22296.9 |               |
|                             |                      |                      |                      |               | L2-logistic                  | <b>0.953 ± 0.024</b> | 0.649 ± 0.173        | 0.985 ± 0.011        | 0.713 ± 0.153        | all*              |               |
| aztreonam                   | 419                  | 39                   | 380                  | 35.2          | Majority                     | 0.906 ± 0.018        | 0.000 ± 0.000        | <b>1.000 ± 0.000</b> | –                    | –                 |               |
|                             |                      |                      |                      |               | Naive Bayes                  | 0.765 ± 0.086        | <b>0.854 ± 0.135</b> | 0.755 ± 0.089        | 0.418 ± 0.128        | all               |               |
|                             |                      |                      |                      |               | Poly-SVM                     | 0.934 ± 0.024        | 0.497 ± 0.223        | 0.980 ± 0.025        | 0.556 ± 0.207        | all               |               |
|                             |                      |                      |                      |               | RBF-SVM                      | 0.931 ± 0.027        | 0.432 ± 0.304        | 0.984 ± 0.019        | –                    | all               |               |
|                             |                      |                      |                      |               | Random Forests               | <b>0.959 ± 0.021</b> | 0.628 ± 0.133        | <b>0.995 ± 0.009</b> | 0.745 ± 0.113        | 4960.1 ± 4877.3   |               |
|                             |                      |                      |                      |               | CART <sub>b</sub>            | <b>0.960 ± 0.021</b> | 0.696 ± 0.118        | 0.988 ± 0.012        | <b>0.768 ± 0.105</b> | 1.0 ± 0.0         |               |
|                             |                      |                      |                      |               | CART <sub>cv</sub>           | <b>0.958 ± 0.023</b> | 0.696 ± 0.118        | 0.985 ± 0.015        | <b>0.759 ± 0.108</b> | 1.6 ± 1.3         |               |
|                             |                      |                      |                      |               | SCM <sub>b</sub>             | <b>0.960 ± 0.021</b> | 0.696 ± 0.118        | 0.988 ± 0.012        | <b>0.768 ± 0.105</b> | 1.0 ± 0.0         |               |
|                             |                      |                      |                      |               | SCM <sub>cv</sub>            | <b>0.958 ± 0.021</b> | 0.710 ± 0.110        | 0.984 ± 0.012        | <b>0.760 ± 0.101</b> | 1.8 ± 1.0         |               |
|                             |                      |                      |                      |               | L1-logistic                  | 0.804 ± 0.056        | 0.548 ± 0.149        | 0.884 ± 0.050        | 0.571 ± 0.124        | 592.7 ± 753.2     |               |
|                             |                      |                      |                      |               | L2-logistic                  | 0.812 ± 0.074        | <b>0.565 ± 0.157</b> | 0.893 ± 0.058        | 0.594 ± 0.150        | all*              |               |
|                             |                      |                      |                      |               | Majority                     | 0.752 ± 0.056        | 0.000 ± 0.000        | <b>1.000 ± 0.000</b> | –                    | –                 |               |
|                             |                      |                      |                      |               | Naive Bayes                  | 0.834 ± 0.045        | <b>0.558 ± 0.156</b> | 0.919 ± 0.046        | 0.613 ± 0.126        | all               |               |
|                             |                      |                      |                      |               | Poly-SVM                     | <b>0.840 ± 0.037</b> | 0.485 ± 0.114        | 0.955 ± 0.025        | 0.589 ± 0.118        | all               |               |
|                             |                      |                      |                      |               | cefalotin                    | 250                  | 59                   | 191                  | 29.7                 | L1-logistic       | 0.804 ± 0.056 |
| L2-logistic                 | 0.812 ± 0.074        | <b>0.565 ± 0.157</b> | 0.893 ± 0.058        | 0.594 ± 0.150 |                              |                      |                      |                      |                      | all*              |               |
| Majority                    | 0.752 ± 0.056        | 0.000 ± 0.000        | <b>1.000 ± 0.000</b> | –             |                              |                      |                      |                      |                      | –                 |               |
| Naive Bayes                 | 0.834 ± 0.045        | <b>0.558 ± 0.156</b> | 0.919 ± 0.046        | 0.613 ± 0.126 |                              |                      |                      |                      |                      | all               |               |
| Poly-SVM                    | <b>0.840 ± 0.037</b> | 0.485 ± 0.114        | 0.955 ± 0.025        | 0.589 ± 0.118 |                              |                      |                      |                      |                      | all               |               |

Continued on next page

**Table S1.** (Continued)

| Species            | Antibiotic           | Genomes              | Resistant            | Susceptible          | <i>k</i> -mers<br>(millions) | Method               | Accuracy             | Sensitivity          | Specificity          | F1 score           | Complexity    |                      |                      |               |                   |
|--------------------|----------------------|----------------------|----------------------|----------------------|------------------------------|----------------------|----------------------|----------------------|----------------------|--------------------|---------------|----------------------|----------------------|---------------|-------------------|
| cefepime           | 426                  | 32                   | 394                  | 35.8                 | RBF-SVM                      | 0.836 ± 0.030        | 0.492 ± 0.112        | 0.947 ± 0.028        | 0.586 ± 0.111        | all                |               |                      |                      |               |                   |
|                    |                      |                      |                      |                      | Random Forests               | <b>0.846 ± 0.042</b> | 0.502 ± 0.138        | 0.956 ± 0.035        | 0.604 ± 0.145        | 1334.6 ± 2911.6    |               |                      |                      |               |                   |
|                    |                      |                      |                      |                      | CART <sub>b</sub>            | 0.836 ± 0.048        | 0.530 ± 0.131        | 0.933 ± 0.041        | 0.608 ± 0.128        | 1.0 ± 0.0          |               |                      |                      |               |                   |
|                    |                      |                      |                      |                      | CART <sub>cv</sub>           | 0.836 ± 0.044        | 0.524 ± 0.120        | 0.936 ± 0.041        | 0.601 ± 0.124        | 2.0 ± 1.5          |               |                      |                      |               |                   |
|                    |                      |                      |                      |                      | SCM <sub>b</sub>             | 0.830 ± 0.047        | 0.520 ± 0.137        | 0.927 ± 0.034        | 0.594 ± 0.130        | 1.0 ± 0.0          |               |                      |                      |               |                   |
|                    |                      |                      |                      |                      | SCM <sub>cv</sub>            | <b>0.840 ± 0.057</b> | 0.538 ± 0.092        | 0.941 ± 0.045        | <b>0.626 ± 0.106</b> | 3.2 ± 1.4          |               |                      |                      |               |                   |
|                    |                      |                      |                      |                      | L1-logistic                  | <b>0.971 ± 0.022</b> | 0.825 ± 0.163        | 0.981 ± 0.021        | 0.795 ± 0.133        | 3594.5 ± 4097.0    |               |                      |                      |               |                   |
|                    |                      |                      |                      |                      | L2-logistic                  | <b>0.975 ± 0.019</b> | 0.754 ± 0.215        | 0.990 ± 0.013        | 0.786 ± 0.205        | all*               |               |                      |                      |               |                   |
|                    |                      |                      |                      |                      | Majority                     | 0.934 ± 0.019        | 0.000 ± 0.000        | <b>1.000 ± 0.000</b> | –                    | –                  |               |                      |                      |               |                   |
|                    |                      |                      |                      |                      | Naive Bayes                  | 0.782 ± 0.049        | 0.679 ± 0.197        | 0.790 ± 0.052        | 0.293 ± 0.115        | all                |               |                      |                      |               |                   |
|                    |                      |                      |                      |                      | Poly-SVM                     | 0.966 ± 0.015        | 0.576 ± 0.259        | <b>0.994 ± 0.009</b> | 0.657 ± 0.188        | all                |               |                      |                      |               |                   |
|                    |                      |                      |                      |                      | RBF-SVM                      | 0.966 ± 0.016        | 0.565 ± 0.258        | <b>0.995 ± 0.009</b> | 0.657 ± 0.186        | all                |               |                      |                      |               |                   |
|                    |                      |                      |                      |                      | Random Forests               | <b>0.979 ± 0.013</b> | 0.754 ± 0.173        | <b>0.995 ± 0.011</b> | <b>0.823 ± 0.103</b> | 1626.6 ± 2320.9    |               |                      |                      |               |                   |
|                    |                      |                      |                      |                      | CART <sub>b</sub>            | 0.966 ± 0.016        | 0.728 ± 0.144        | 0.982 ± 0.017        | 0.736 ± 0.083        | 1.4 ± 0.7          |               |                      |                      |               |                   |
|                    |                      |                      |                      |                      | CART <sub>cv</sub>           | <b>0.973 ± 0.014</b> | <b>0.841 ± 0.153</b> | 0.982 ± 0.012        | 0.800 ± 0.100        | 3.4 ± 1.2          |               |                      |                      |               |                   |
|                    |                      |                      |                      |                      | cefotaxime                   | 1450                 | 139                  | 1311                 | 43.7                 | SCM <sub>b</sub>   | 0.964 ± 0.017 | 0.705 ± 0.199        | 0.981 ± 0.017        | 0.709 ± 0.130 | 1.5 ± 0.5         |
| SCM <sub>cv</sub>  | 0.965 ± 0.018        | 0.768 ± 0.299        | 0.978 ± 0.018        | –                    |                              |                      |                      |                      |                      | 2.1 ± 0.3          |               |                      |                      |               |                   |
| L1-logistic        | <b>0.976 ± 0.009</b> | <b>0.860 ± 0.088</b> | 0.988 ± 0.006        | 0.873 ± 0.060        |                              |                      |                      |                      |                      | 67531.0 ± 138221.3 |               |                      |                      |               |                   |
| L2-logistic        | <b>0.973 ± 0.010</b> | <b>0.860 ± 0.086</b> | 0.985 ± 0.006        | 0.859 ± 0.062        |                              |                      |                      |                      |                      | all*               |               |                      |                      |               |                   |
| Majority           | 0.898 ± 0.018        | 0.000 ± 0.000        | <b>1.000 ± 0.000</b> | –                    |                              |                      |                      |                      |                      | –                  |               |                      |                      |               |                   |
| Naive Bayes        | 0.830 ± 0.048        | 0.754 ± 0.105        | 0.837 ± 0.061        | 0.477 ± 0.060        |                              |                      |                      |                      |                      | all                |               |                      |                      |               |                   |
| Poly-SVM           | <b>0.971 ± 0.011</b> | 0.816 ± 0.101        | 0.988 ± 0.006        | 0.846 ± 0.067        |                              |                      |                      |                      |                      | all                |               |                      |                      |               |                   |
| RBF-SVM            | 0.969 ± 0.010        | 0.803 ± 0.091        | 0.987 ± 0.007        | 0.833 ± 0.065        |                              |                      |                      |                      |                      | all                |               |                      |                      |               |                   |
| Random Forests     | <b>0.979 ± 0.011</b> | 0.850 ± 0.089        | <b>0.993 ± 0.005</b> | <b>0.890 ± 0.059</b> |                              |                      |                      |                      |                      | 12400.7 ± 11836.2  |               |                      |                      |               |                   |
| CART <sub>b</sub>  | <b>0.973 ± 0.009</b> | 0.782 ± 0.089        | <b>0.994 ± 0.004</b> | 0.849 ± 0.058        |                              |                      |                      |                      |                      | 2.8 ± 0.9          |               |                      |                      |               |                   |
| CART <sub>cv</sub> | <b>0.979 ± 0.008</b> | <b>0.858 ± 0.092</b> | <b>0.993 ± 0.003</b> | <b>0.890 ± 0.051</b> |                              |                      |                      |                      |                      | 6.0 ± 2.4          |               |                      |                      |               |                   |
| SCM <sub>b</sub>   | <b>0.974 ± 0.007</b> | 0.786 ± 0.074        | <b>0.995 ± 0.004</b> | 0.858 ± 0.044        |                              |                      |                      |                      |                      | 3.0 ± 1.1          |               |                      |                      |               |                   |
| SCM <sub>cv</sub>  | <b>0.980 ± 0.009</b> | <b>0.860 ± 0.094</b> | <b>0.993 ± 0.003</b> | <b>0.892 ± 0.053</b> |                              |                      |                      |                      |                      | 5.2 ± 1.2          |               |                      |                      |               |                   |
| cefodoxitin        | 417                  | 27                   | 390                  | 35.3                 |                              |                      |                      |                      |                      | L1-logistic        | 0.964 ± 0.025 | 0.682 ± 0.232        | 0.982 ± 0.017        | 0.686 ± 0.198 | 1584.0 ± 3147.2   |
|                    |                      |                      |                      |                      |                              |                      |                      |                      |                      | L2-logistic        | 0.945 ± 0.021 | 0.489 ± 0.219        | 0.974 ± 0.018        | 0.500 ± 0.175 | all*              |
|                    |                      |                      |                      |                      |                              |                      |                      |                      |                      | Majority           | 0.940 ± 0.015 | 0.000 ± 0.000        | <b>1.000 ± 0.000</b> | –             | –                 |
|                    |                      |                      |                      |                      | Naive Bayes                  | 0.810 ± 0.038        | 0.381 ± 0.234        | 0.836 ± 0.036        | –                    | all                |               |                      |                      |               |                   |
|                    |                      |                      |                      |                      | Poly-SVM                     | 0.965 ± 0.012        | 0.400 ± 0.258        | <b>0.999 ± 0.004</b> | –                    | all                |               |                      |                      |               |                   |
|                    |                      |                      |                      |                      | RBF-SVM                      | 0.967 ± 0.013        | 0.450 ± 0.247        | <b>0.999 ± 0.004</b> | –                    | all                |               |                      |                      |               |                   |
|                    |                      |                      |                      |                      | Random Forests               | 0.961 ± 0.017        | 0.407 ± 0.274        | <b>0.996 ± 0.009</b> | –                    | 788.2 ± 1579.9     |               |                      |                      |               |                   |
|                    |                      |                      |                      |                      | CART <sub>b</sub>            | <b>0.973 ± 0.018</b> | <b>0.794 ± 0.130</b> | 0.985 ± 0.013        | 0.782 ± 0.131        | 1.0 ± 0.0          |               |                      |                      |               |                   |
|                    |                      |                      |                      |                      | CART <sub>cv</sub>           | 0.971 ± 0.017        | <b>0.799 ± 0.129</b> | 0.982 ± 0.015        | 0.769 ± 0.123        | 1.7 ± 0.9          |               |                      |                      |               |                   |
|                    |                      |                      |                      |                      | SCM <sub>b</sub>             | <b>0.973 ± 0.018</b> | <b>0.794 ± 0.130</b> | 0.985 ± 0.013        | 0.782 ± 0.131        | 1.0 ± 0.0          |               |                      |                      |               |                   |
|                    |                      |                      |                      |                      | SCM <sub>cv</sub>            | <b>0.982 ± 0.014</b> | 0.744 ± 0.182        | <b>0.996 ± 0.012</b> | <b>0.816 ± 0.143</b> | 2.0 ± 0.0          |               |                      |                      |               |                   |
|                    |                      |                      |                      |                      | cefuroxime                   | 1507                 | 241                  | 1266                 | 47.9                 | L1-logistic        | 0.833 ± 0.021 | 0.333 ± 0.289        | 0.928 ± 0.065        | –             | 11536.9 ± 14007.2 |
|                    |                      |                      |                      |                      |                              |                      |                      |                      |                      | L2-logistic        | 0.830 ± 0.028 | 0.504 ± 0.111        | 0.893 ± 0.036        | 0.486 ± 0.085 | all*              |
|                    |                      |                      |                      |                      |                              |                      |                      |                      |                      | Majority           | 0.838 ± 0.020 | 0.000 ± 0.000        | <b>1.000 ± 0.000</b> | –             | –                 |
|                    |                      |                      |                      |                      |                              |                      |                      |                      |                      | Naive Bayes        | 0.793 ± 0.022 | <b>0.578 ± 0.096</b> | 0.834 ± 0.031        | 0.472 ± 0.054 | all               |
|                    |                      |                      |                      |                      |                              |                      |                      |                      |                      | Poly-SVM           | 0.880 ± 0.018 | 0.395 ± 0.073        | 0.974 ± 0.013        | 0.514 ± 0.083 | all               |
| RBF-SVM            | 0.875 ± 0.011        | 0.392 ± 0.062        | 0.968 ± 0.012        | 0.500 ± 0.059        |                              |                      |                      |                      |                      | all                |               |                      |                      |               |                   |

Continued on next page

**Table S1.** (Continued)

| Species            | Antibiotic           | Genomes              | Resistant            | Susceptible          | <i>k</i> -mers<br>(millions) | Method             | Accuracy             | Sensitivity          | Specificity          | F1 score             | Complexity         |
|--------------------|----------------------|----------------------|----------------------|----------------------|------------------------------|--------------------|----------------------|----------------------|----------------------|----------------------|--------------------|
| ceftazidime        |                      | 1497                 | 99                   | 1398                 | 48.8                         | Random Forests     | 0.904 ± 0.012        | 0.439 ± 0.063        | <b>0.994 ± 0.005</b> | 0.594 ± 0.056        | 8889.5 ± 13173.8   |
|                    |                      |                      |                      |                      |                              | CART <sub>b</sub>  | <b>0.913 ± 0.015</b> | 0.502 ± 0.055        | <b>0.992 ± 0.004</b> | 0.650 ± 0.053        | 3.0 ± 0.5          |
|                    |                      |                      |                      |                      |                              | CART <sub>cv</sub> | <b>0.916 ± 0.011</b> | 0.534 ± 0.058        | 0.990 ± 0.006        | <b>0.672 ± 0.047</b> | 5.5 ± 1.4          |
|                    |                      |                      |                      |                      |                              | SCM <sub>b</sub>   | <b>0.915 ± 0.015</b> | 0.515 ± 0.052        | <b>0.992 ± 0.004</b> | 0.660 ± 0.051        | 3.4 ± 0.8          |
|                    |                      |                      |                      |                      |                              | SCM <sub>cv</sub>  | <b>0.917 ± 0.012</b> | 0.545 ± 0.064        | 0.989 ± 0.004        | <b>0.679 ± 0.052</b> | 5.5 ± 1.2          |
|                    |                      |                      |                      |                      |                              | L1-logistic        | 0.976 ± 0.010        | 0.794 ± 0.136        | 0.989 ± 0.007        | 0.812 ± 0.093        | 47016.4 ± 110544.7 |
|                    |                      |                      |                      |                      |                              | L2-logistic        | 0.974 ± 0.008        | 0.743 ± 0.126        | 0.990 ± 0.008        | 0.786 ± 0.087        | all*               |
|                    |                      |                      |                      |                      |                              | Majority           | 0.932 ± 0.010        | 0.000 ± 0.000        | <b>1.000 ± 0.000</b> | –                    | –                  |
|                    |                      |                      |                      |                      |                              | Naive Bayes        | 0.768 ± 0.023        | <b>0.905 ± 0.114</b> | 0.758 ± 0.025        | 0.343 ± 0.047        | all                |
|                    |                      |                      |                      |                      |                              | Poly-SVM           | 0.966 ± 0.008        | 0.636 ± 0.097        | 0.990 ± 0.009        | 0.710 ± 0.080        | all                |
|                    |                      |                      |                      |                      |                              | RBF-SVM            | 0.966 ± 0.008        | 0.639 ± 0.088        | 0.989 ± 0.008        | 0.712 ± 0.074        | all                |
|                    |                      |                      |                      |                      |                              | Random Forests     | <b>0.988 ± 0.007</b> | 0.840 ± 0.108        | <b>0.998 ± 0.002</b> | <b>0.895 ± 0.064</b> | 7770.6 ± 8004.7    |
|                    |                      |                      |                      |                      |                              | CART <sub>b</sub>  | 0.976 ± 0.010        | 0.723 ± 0.140        | <b>0.994 ± 0.004</b> | 0.789 ± 0.105        | 2.8 ± 0.4          |
|                    |                      |                      |                      |                      |                              | CART <sub>cv</sub> | <b>0.983 ± 0.005</b> | 0.826 ± 0.082        | <b>0.994 ± 0.006</b> | 0.867 ± 0.045        | 5.8 ± 1.9          |
|                    |                      |                      |                      |                      |                              | SCM <sub>b</sub>   | <b>0.979 ± 0.010</b> | 0.730 ± 0.128        | <b>0.996 ± 0.004</b> | 0.814 ± 0.101        | 2.8 ± 0.6          |
| SCM <sub>cv</sub>  | <b>0.985 ± 0.005</b> | 0.830 ± 0.065        | <b>0.996 ± 0.005</b> | 0.882 ± 0.043        | 3.8 ± 0.6                    |                    |                      |                      |                      |                      |                    |
| ciprofloxacin      |                      | 1519                 | 289                  | 1230                 | 44.7                         | L1-logistic        | <b>0.986 ± 0.006</b> | <b>0.949 ± 0.028</b> | <b>0.995 ± 0.005</b> | <b>0.962 ± 0.018</b> | 432.7 ± 1043.6     |
|                    |                      |                      |                      |                      |                              | L2-logistic        | 0.963 ± 0.012        | 0.868 ± 0.065        | 0.986 ± 0.010        | 0.900 ± 0.031        | all*               |
|                    |                      |                      |                      |                      |                              | Majority           | 0.806 ± 0.021        | 0.000 ± 0.000        | <b>1.000 ± 0.000</b> | –                    | –                  |
|                    |                      |                      |                      |                      |                              | Naive Bayes        | 0.835 ± 0.029        | 0.911 ± 0.052        | 0.817 ± 0.043        | 0.682 ± 0.048        | all                |
|                    |                      |                      |                      |                      |                              | Poly-SVM           | 0.965 ± 0.014        | 0.845 ± 0.061        | <b>0.994 ± 0.006</b> | 0.902 ± 0.035        | all                |
|                    |                      |                      |                      |                      |                              | RBF-SVM            | 0.965 ± 0.014        | 0.850 ± 0.060        | <b>0.993 ± 0.008</b> | 0.903 ± 0.034        | all                |
|                    |                      |                      |                      |                      |                              | Random Forests     | 0.975 ± 0.011        | 0.892 ± 0.051        | <b>0.996 ± 0.006</b> | 0.932 ± 0.029        | 6291.3 ± 11483.4   |
|                    |                      |                      |                      |                      |                              | CART <sub>b</sub>  | <b>0.985 ± 0.005</b> | 0.938 ± 0.022        | <b>0.996 ± 0.005</b> | <b>0.960 ± 0.013</b> | 2.0 ± 0.0          |
|                    |                      |                      |                      |                      |                              | CART <sub>cv</sub> | <b>0.983 ± 0.005</b> | 0.935 ± 0.022        | <b>0.996 ± 0.005</b> | <b>0.957 ± 0.012</b> | 2.2 ± 0.4          |
|                    |                      |                      |                      |                      |                              | SCM <sub>b</sub>   | <b>0.983 ± 0.005</b> | 0.938 ± 0.022        | <b>0.995 ± 0.005</b> | <b>0.956 ± 0.013</b> | 2.0 ± 0.0          |
|                    |                      |                      |                      |                      |                              | SCM <sub>cv</sub>  | <b>0.983 ± 0.004</b> | 0.939 ± 0.023        | <b>0.995 ± 0.005</b> | <b>0.957 ± 0.010</b> | 2.7 ± 1.1          |
|                    |                      |                      |                      |                      |                              | L1-logistic        | <b>0.983 ± 0.007</b> | <b>0.896 ± 0.053</b> | <b>0.991 ± 0.005</b> | 0.891 ± 0.043        | 5673.3 ± 13968.4   |
|                    |                      |                      |                      |                      |                              | L2-logistic        | <b>0.979 ± 0.007</b> | 0.851 ± 0.068        | <b>0.991 ± 0.005</b> | 0.864 ± 0.045        | all*               |
|                    |                      |                      |                      |                      |                              | Majority           | 0.923 ± 0.011        | 0.000 ± 0.000        | <b>1.000 ± 0.000</b> | –                    | –                  |
|                    |                      |                      |                      |                      |                              | Naive Bayes        | 0.687 ± 0.037        | 0.824 ± 0.048        | 0.676 ± 0.043        | 0.289 ± 0.038        | all                |
| Poly-SVM           | 0.956 ± 0.014        | 0.614 ± 0.152        | 0.986 ± 0.006        | 0.676 ± 0.104        | all                          |                    |                      |                      |                      |                      |                    |
| RBF-SVM            | 0.957 ± 0.013        | 0.619 ± 0.134        | 0.986 ± 0.005        | 0.686 ± 0.096        | all                          |                    |                      |                      |                      |                      |                    |
| Random Forests     | <b>0.987 ± 0.007</b> | <b>0.900 ± 0.070</b> | <b>0.995 ± 0.005</b> | <b>0.914 ± 0.055</b> | 4242.2 ± 5881.0              |                    |                      |                      |                      |                      |                    |
| CART <sub>b</sub>  | <b>0.986 ± 0.006</b> | <b>0.898 ± 0.061</b> | <b>0.994 ± 0.004</b> | <b>0.907 ± 0.046</b> | 2.0 ± 0.0                    |                    |                      |                      |                      |                      |                    |
| CART <sub>cv</sub> | <b>0.985 ± 0.009</b> | <b>0.893 ± 0.064</b> | <b>0.993 ± 0.007</b> | 0.898 ± 0.063        | 2.4 ± 1.3                    |                    |                      |                      |                      |                      |                    |
| SCM <sub>b</sub>   | <b>0.986 ± 0.006</b> | <b>0.898 ± 0.061</b> | <b>0.994 ± 0.004</b> | <b>0.907 ± 0.046</b> | 2.0 ± 0.0                    |                    |                      |                      |                      |                      |                    |
| SCM <sub>cv</sub>  | <b>0.986 ± 0.007</b> | <b>0.898 ± 0.061</b> | <b>0.993 ± 0.005</b> | <b>0.905 ± 0.049</b> | 2.2 ± 0.6                    |                    |                      |                      |                      |                      |                    |
| meropenem          |                      | 446                  | 28                   | 418                  | 36.2                         | L1-logistic        | <b>0.982 ± 0.013</b> | <b>0.963 ± 0.078</b> | 0.983 ± 0.015        | 0.844 ± 0.093        | 445.5 ± 394.3      |
|                    |                      |                      |                      |                      |                              | L2-logistic        | 0.976 ± 0.011        | 0.787 ± 0.189        | 0.987 ± 0.009        | 0.761 ± 0.118        | all*               |
|                    |                      |                      |                      |                      |                              | Majority           | 0.949 ± 0.012        | 0.000 ± 0.000        | <b>1.000 ± 0.000</b> | –                    | –                  |
|                    |                      |                      |                      |                      |                              | Naive Bayes        | 0.811 ± 0.046        | 0.838 ± 0.121        | 0.809 ± 0.047        | 0.316 ± 0.101        | all                |
|                    |                      |                      |                      |                      |                              | Poly-SVM           | <b>0.984 ± 0.009</b> | 0.770 ± 0.184        | <b>0.996 ± 0.006</b> | 0.823 ± 0.098        | all                |
|                    |                      |                      |                      |                      |                              | RBF-SVM            | <b>0.983 ± 0.010</b> | 0.745 ± 0.203        | <b>0.996 ± 0.008</b> | 0.806 ± 0.105        | all                |
|                    |                      |                      |                      |                      |                              | Random Forests     | <b>0.990 ± 0.006</b> | 0.863 ± 0.127        | <b>0.996 ± 0.006</b> | <b>0.883 ± 0.093</b> | 2669.0 ± 2582.8    |

Continued on next page

**Table S1.** (Continued)

| Species            | Antibiotic              | Genomes              | Resistant     | Susceptible          | <i>k</i> -mers<br>(millions) | Method             | Accuracy             | Sensitivity          | Specificity          | F1 score             | Complexity        |
|--------------------|-------------------------|----------------------|---------------|----------------------|------------------------------|--------------------|----------------------|----------------------|----------------------|----------------------|-------------------|
|                    | piperacillin/tazobactam | 1461                 | 99            | 1362                 | 48.0                         | CART <sub>b</sub>  | 0.978 ± 0.013        | 0.922 ± 0.130        | 0.981 ± 0.014        | 0.802 ± 0.097        | 1.4 ± 0.5         |
|                    |                         |                      |               |                      |                              | CART <sub>cv</sub> | 0.976 ± 0.013        | 0.907 ± 0.158        | 0.981 ± 0.014        | 0.791 ± 0.103        | 1.6 ± 1.1         |
|                    |                         |                      |               |                      |                              | SCM <sub>b</sub>   | 0.978 ± 0.013        | 0.922 ± 0.130        | 0.981 ± 0.014        | 0.802 ± 0.097        | 1.1 ± 0.3         |
|                    |                         |                      |               |                      |                              | SCM <sub>cv</sub>  | 0.973 ± 0.012        | 0.840 ± 0.152        | 0.981 ± 0.016        | 0.758 ± 0.069        | 1.8 ± 0.8         |
|                    |                         |                      |               |                      |                              | L1-logistic        | <b>0.929 ± 0.012</b> | 0.000 ± 0.000        | <b>1.000 ± 0.000</b> | –                    | 0.0 ± 0.0         |
|                    |                         |                      |               |                      |                              | L2-logistic        | 0.899 ± 0.019        | 0.176 ± 0.101        | 0.953 ± 0.016        | –                    | all*              |
|                    |                         |                      |               |                      |                              | Majority           | <b>0.929 ± 0.012</b> | 0.000 ± 0.000        | <b>1.000 ± 0.000</b> | –                    | –                 |
|                    |                         |                      |               |                      |                              | Naive Bayes        | 0.675 ± 0.034        | <b>0.481 ± 0.139</b> | 0.689 ± 0.038        | <b>0.173 ± 0.053</b> | all               |
|                    |                         |                      |               |                      |                              | Poly-SVM           | <b>0.933 ± 0.010</b> | 0.066 ± 0.053        | <b>0.999 ± 0.002</b> | –                    | all               |
|                    |                         |                      |               |                      |                              | RBF-SVM            | <b>0.931 ± 0.010</b> | 0.054 ± 0.045        | <b>0.998 ± 0.003</b> | –                    | all               |
|                    |                         |                      |               |                      |                              | Random Forests     | <b>0.935 ± 0.010</b> | 0.100 ± 0.060        | <b>0.998 ± 0.004</b> | –                    | 1164.6 ± 2422.5   |
|                    |                         |                      |               |                      |                              | CART <sub>b</sub>  | <b>0.929 ± 0.010</b> | 0.036 ± 0.049        | <b>0.997 ± 0.004</b> | –                    | 0.5 ± 0.5         |
|                    |                         |                      |               |                      |                              | CART <sub>cv</sub> | <b>0.930 ± 0.012</b> | 0.104 ± 0.060        | <b>0.993 ± 0.006</b> | –                    | 1.4 ± 0.7         |
|                    |                         |                      |               |                      |                              | SCM <sub>b</sub>   | <b>0.932 ± 0.012</b> | 0.095 ± 0.047        | <b>0.995 ± 0.006</b> | –                    | 1.0 ± 0.0         |
|                    |                         |                      |               |                      |                              | SCM <sub>cv</sub>  | <b>0.933 ± 0.010</b> | 0.099 ± 0.052        | <b>0.996 ± 0.003</b> | –                    | 1.8 ± 0.4         |
|                    | tobramycin              | 422                  | 50            | 372                  | 31.5                         | L1-logistic        | 0.974 ± 0.014        | 0.892 ± 0.115        | 0.985 ± 0.015        | 0.883 ± 0.062        | 1686.7 ± 1223.2   |
|                    |                         |                      |               |                      |                              | L2-logistic        | 0.964 ± 0.018        | 0.824 ± 0.124        | 0.982 ± 0.018        | 0.840 ± 0.082        | all*              |
|                    |                         |                      |               |                      |                              | Majority           | 0.886 ± 0.025        | 0.000 ± 0.000        | <b>1.000 ± 0.000</b> | –                    | –                 |
|                    |                         |                      |               |                      |                              | Naive Bayes        | 0.790 ± 0.074        | 0.802 ± 0.166        | 0.787 ± 0.097        | 0.473 ± 0.074        | all               |
|                    |                         |                      |               |                      |                              | Poly-SVM           | 0.915 ± 0.027        | 0.536 ± 0.088        | 0.965 ± 0.022        | 0.593 ± 0.100        | all               |
|                    |                         |                      |               |                      |                              | RBF-SVM            | 0.912 ± 0.033        | 0.546 ± 0.117        | 0.960 ± 0.029        | 0.589 ± 0.124        | all               |
|                    |                         |                      |               |                      |                              | Random Forests     | <b>0.981 ± 0.018</b> | 0.867 ± 0.135        | <b>0.996 ± 0.006</b> | 0.908 ± 0.095        | 574.1 ± 917.1     |
|                    |                         |                      |               |                      |                              | CART <sub>b</sub>  | <b>0.985 ± 0.014</b> | <b>0.924 ± 0.106</b> | <b>0.992 ± 0.009</b> | <b>0.927 ± 0.072</b> | 2.0 ± 0.0         |
|                    |                         |                      |               |                      |                              | CART <sub>cv</sub> | <b>0.985 ± 0.014</b> | <b>0.924 ± 0.106</b> | <b>0.992 ± 0.009</b> | <b>0.927 ± 0.072</b> | 2.0 ± 0.0         |
|                    |                         |                      |               |                      |                              | SCM <sub>b</sub>   | <b>0.985 ± 0.014</b> | <b>0.924 ± 0.106</b> | <b>0.992 ± 0.009</b> | <b>0.927 ± 0.072</b> | 2.0 ± 0.0         |
|                    |                         |                      |               |                      |                              | SCM <sub>cv</sub>  | <b>0.981 ± 0.014</b> | 0.899 ± 0.115        | <b>0.992 ± 0.009</b> | 0.913 ± 0.070        | 2.0 ± 0.0         |
|                    |                         |                      |               |                      |                              | L1-logistic        | <b>0.933 ± 0.025</b> | <b>0.904 ± 0.060</b> | 0.949 ± 0.033        | <b>0.900 ± 0.036</b> | 14801.2 ± 14384.9 |
|                    |                         |                      |               |                      |                              | L2-logistic        | 0.911 ± 0.026        | 0.890 ± 0.059        | 0.923 ± 0.037        | 0.870 ± 0.039        | all*              |
|                    |                         |                      |               |                      |                              | Majority           | 0.662 ± 0.038        | 0.000 ± 0.000        | <b>1.000 ± 0.000</b> | –                    | –                 |
|                    |                         |                      |               |                      |                              | Naive Bayes        | 0.711 ± 0.038        | 0.730 ± 0.085        | 0.700 ± 0.050        | 0.627 ± 0.064        | all               |
| Poly-SVM           | 0.839 ± 0.044           | 0.753 ± 0.120        | 0.885 ± 0.049 | 0.755 ± 0.075        | all                          |                    |                      |                      |                      |                      |                   |
| RBF-SVM            | 0.832 ± 0.050           | 0.746 ± 0.124        | 0.877 ± 0.042 | 0.745 ± 0.081        | all                          |                    |                      |                      |                      |                      |                   |
| Random Forests     | <b>0.929 ± 0.021</b>    | <b>0.898 ± 0.057</b> | 0.946 ± 0.027 | 0.893 ± 0.037        | 7838.8 ± 8352.5              |                    |                      |                      |                      |                      |                   |
| CART <sub>b</sub>  | <b>0.935 ± 0.021</b>    | 0.880 ± 0.058        | 0.963 ± 0.031 | <b>0.901 ± 0.033</b> | 2.0 ± 0.0                    |                    |                      |                      |                      |                      |                   |
| CART <sub>cv</sub> | 0.926 ± 0.032           | 0.870 ± 0.072        | 0.955 ± 0.052 | 0.887 ± 0.046        | 2.8 ± 0.9                    |                    |                      |                      |                      |                      |                   |
| SCM <sub>b</sub>   | <b>0.938 ± 0.022</b>    | 0.887 ± 0.061        | 0.963 ± 0.031 | <b>0.905 ± 0.035</b> | 2.0 ± 0.0                    |                    |                      |                      |                      |                      |                   |
| SCM <sub>cv</sub>  | <b>0.935 ± 0.024</b>    | 0.887 ± 0.054        | 0.960 ± 0.033 | <b>0.901 ± 0.039</b> | 2.8 ± 1.4                    |                    |                      |                      |                      |                      |                   |
| <i>E. faecium</i>  | vancomycin              | 134                  | 51            | 83                   | 10.3                         | L1-logistic        | <b>1.000 ± 0.000</b> | <b>1.000 ± 0.000</b> | <b>1.000 ± 0.000</b> | <b>1.000 ± 0.000</b> | 142.0 ± 45.2      |
|                    |                         |                      |               |                      |                              | L2-logistic        | <b>1.000 ± 0.000</b> | <b>1.000 ± 0.000</b> | <b>1.000 ± 0.000</b> | <b>1.000 ± 0.000</b> | all*              |
|                    |                         |                      |               |                      |                              | Majority           | 0.588 ± 0.112        | 0.000 ± 0.000        | <b>1.000 ± 0.000</b> | –                    | –                 |
|                    |                         |                      |               |                      |                              | Naive Bayes        | 0.808 ± 0.110        | 0.589 ± 0.189        | 0.976 ± 0.043        | 0.707 ± 0.159        | all               |
|                    |                         |                      |               |                      |                              | Poly-SVM           | <b>0.996 ± 0.012</b> | <b>0.992 ± 0.024</b> | <b>1.000 ± 0.000</b> | <b>0.996 ± 0.013</b> | all               |
|                    |                         |                      |               |                      |                              | RBF-SVM            | <b>0.992 ± 0.016</b> | 0.980 ± 0.044        | <b>1.000 ± 0.000</b> | 0.989 ± 0.023        | all               |
|                    |                         |                      |               |                      |                              | Random Forests     | <b>1.000 ± 0.000</b> | <b>1.000 ± 0.000</b> | <b>1.000 ± 0.000</b> | <b>1.000 ± 0.000</b> | 202.6 ± 491.7     |

Continued on next page

**Table S1.** (Continued)

| Species              | Antibiotic                  | Genomes              | Resistant            | Susceptible          | <i>k</i> -mers<br>(millions) | Method               | Accuracy             | Sensitivity          | Specificity          | F1 score             | Complexity         |                      |               |               |                      |                |
|----------------------|-----------------------------|----------------------|----------------------|----------------------|------------------------------|----------------------|----------------------|----------------------|----------------------|----------------------|--------------------|----------------------|---------------|---------------|----------------------|----------------|
| <i>K. pneumoniae</i> | amikacin                    | 1893                 | 180                  | 1713                 | 73.2                         | CART <sub>b</sub>    | <b>1.000 ± 0.000</b> | <b>1.000 ± 0.000</b> | <b>1.000 ± 0.000</b> | <b>1.000 ± 0.000</b> | 1.0 ± 0.0          |                      |               |               |                      |                |
|                      |                             |                      |                      |                      |                              | CART <sub>cv</sub>   | <b>1.000 ± 0.000</b> | <b>1.000 ± 0.000</b> | <b>1.000 ± 0.000</b> | <b>1.000 ± 0.000</b> | 1.0 ± 0.0          |                      |               |               |                      |                |
|                      |                             |                      |                      |                      |                              | SCM <sub>b</sub>     | <b>1.000 ± 0.000</b> | <b>1.000 ± 0.000</b> | <b>1.000 ± 0.000</b> | <b>1.000 ± 0.000</b> | 1.0 ± 0.0          |                      |               |               |                      |                |
|                      |                             |                      |                      |                      |                              | SCM <sub>cv</sub>    | <b>1.000 ± 0.000</b> | <b>1.000 ± 0.000</b> | <b>1.000 ± 0.000</b> | <b>1.000 ± 0.000</b> | 1.0 ± 0.0          |                      |               |               |                      |                |
|                      |                             |                      |                      |                      |                              | L1-logistic          | <b>0.951 ± 0.010</b> | 0.740 ± 0.060        | 0.974 ± 0.008        | 0.744 ± 0.038        | 37210.7 ± 42390.4  |                      |               |               |                      |                |
|                      |                             |                      |                      |                      |                              | L2-logistic          | 0.942 ± 0.010        | 0.694 ± 0.068        | 0.968 ± 0.010        | 0.693 ± 0.051        | all*               |                      |               |               |                      |                |
|                      |                             |                      |                      |                      |                              | Majority             | 0.904 ± 0.014        | 0.000 ± 0.000        | <b>1.000 ± 0.000</b> | –                    | –                  |                      |               |               |                      |                |
|                      |                             |                      |                      |                      |                              | Naive Bayes          | 0.875 ± 0.020        | <b>0.910 ± 0.046</b> | 0.872 ± 0.020        | 0.583 ± 0.057        | all                |                      |               |               |                      |                |
|                      |                             |                      |                      |                      |                              | Poly-SVM             | <b>0.958 ± 0.010</b> | 0.762 ± 0.086        | 0.980 ± 0.006        | <b>0.776 ± 0.050</b> | all                |                      |               |               |                      |                |
|                      |                             |                      |                      |                      |                              | RBF-SVM              | <b>0.957 ± 0.010</b> | 0.764 ± 0.075        | 0.978 ± 0.005        | <b>0.773 ± 0.042</b> | all                |                      |               |               |                      |                |
|                      |                             |                      |                      |                      |                              | Random Forests       | <b>0.954 ± 0.013</b> | 0.706 ± 0.076        | 0.981 ± 0.008        | 0.750 ± 0.055        | 10355.2 ± 16634.8  |                      |               |               |                      |                |
|                      |                             |                      |                      |                      |                              | CART <sub>b</sub>    | <b>0.949 ± 0.011</b> | 0.673 ± 0.086        | 0.978 ± 0.007        | 0.715 ± 0.061        | 5.2 ± 1.5          |                      |               |               |                      |                |
|                      |                             |                      |                      |                      |                              | CART <sub>cv</sub>   | <b>0.951 ± 0.015</b> | 0.699 ± 0.127        | 0.977 ± 0.009        | 0.726 ± 0.096        | 11.1 ± 4.0         |                      |               |               |                      |                |
|                      |                             |                      |                      |                      |                              | SCM <sub>b</sub>     | <b>0.949 ± 0.015</b> | 0.643 ± 0.140        | 0.981 ± 0.005        | 0.698 ± 0.120        | 4.2 ± 0.4          |                      |               |               |                      |                |
|                      | SCM <sub>cv</sub>           | <b>0.952 ± 0.011</b> | 0.642 ± 0.062        | 0.985 ± 0.008        | 0.720 ± 0.058                | 11.3 ± 5.2           |                      |                      |                      |                      |                    |                      |               |               |                      |                |
|                      | amoxicillin/clavulanic acid | 236                  | 120                  | 116                  | 37.2                         | L1-logistic          | <b>0.921 ± 0.020</b> | 0.937 ± 0.042        | <b>0.904 ± 0.059</b> | <b>0.926 ± 0.021</b> | 69783.1 ± 171583.6 |                      |               |               |                      |                |
|                      |                             |                      |                      |                      |                              | L2-logistic          | <b>0.926 ± 0.037</b> | <b>0.953 ± 0.043</b> | <b>0.898 ± 0.061</b> | <b>0.930 ± 0.038</b> | all*               |                      |               |               |                      |                |
|                      |                             |                      |                      |                      |                              | Majority             | 0.457 ± 0.067        | 0.600 ± 0.516        | 0.400 ± 0.516        | –                    | –                  |                      |               |               |                      |                |
|                      |                             |                      |                      |                      |                              | Naive Bayes          | 0.653 ± 0.100        | 0.932 ± 0.045        | 0.343 ± 0.174        | 0.740 ± 0.080        | all                |                      |               |               |                      |                |
|                      |                             |                      |                      |                      |                              | Poly-SVM             | 0.885 ± 0.040        | 0.884 ± 0.068        | 0.894 ± 0.054        | 0.890 ± 0.042        | all                |                      |               |               |                      |                |
|                      |                             |                      |                      |                      |                              | RBF-SVM              | 0.891 ± 0.052        | 0.888 ± 0.071        | <b>0.901 ± 0.053</b> | 0.896 ± 0.048        | all                |                      |               |               |                      |                |
|                      |                             |                      |                      |                      |                              | Random Forests       | 0.911 ± 0.026        | 0.937 ± 0.052        | 0.880 ± 0.065        | 0.916 ± 0.028        | 2255.7 ± 3172.6    |                      |               |               |                      |                |
|                      |                             |                      |                      |                      |                              | CART <sub>b</sub>    | 0.883 ± 0.046        | 0.904 ± 0.084        | 0.855 ± 0.101        | 0.890 ± 0.050        | 1.8 ± 0.6          |                      |               |               |                      |                |
|                      |                             |                      |                      |                      |                              | CART <sub>cv</sub>   | 0.872 ± 0.040        | 0.883 ± 0.074        | 0.863 ± 0.082        | 0.879 ± 0.043        | 2.2 ± 1.1          |                      |               |               |                      |                |
|                      |                             |                      |                      |                      |                              | SCM <sub>b</sub>     | 0.891 ± 0.039        | 0.929 ± 0.069        | 0.850 ± 0.097        | 0.902 ± 0.029        | 1.9 ± 0.6          |                      |               |               |                      |                |
|                      |                             |                      |                      |                      |                              | SCM <sub>cv</sub>    | 0.872 ± 0.043        | 0.908 ± 0.075        | 0.833 ± 0.101        | 0.883 ± 0.038        | 2.2 ± 0.9          |                      |               |               |                      |                |
|                      |                             |                      |                      |                      |                              | ampicillin/sulbactam | 1654                 | 1563                 | 91                   | 52.3                 | L1-logistic        | <b>0.982 ± 0.006</b> | 0.989 ± 0.005 | 0.843 ± 0.116 | <b>0.990 ± 0.003</b> | 2168.7 ± 787.6 |
|                      |                             |                      |                      |                      |                              |                      |                      |                      |                      |                      | L2-logistic        | 0.970 ± 0.010        | 0.984 ± 0.006 | 0.709 ± 0.202 | 0.984 ± 0.005        | all*           |
| Majority             |                             |                      |                      |                      |                              |                      |                      |                      |                      |                      | 0.952 ± 0.011      | <b>1.000 ± 0.000</b> | 0.000 ± 0.000 | 0.975 ± 0.006 | –                    |                |
| Naive Bayes          | 0.802 ± 0.019               | 0.794 ± 0.021        | <b>0.955 ± 0.056</b> | 0.884 ± 0.012        | all                          |                      |                      |                      |                      |                      |                    |                      |               |               |                      |                |
| Poly-SVM             | 0.974 ± 0.009               | 0.989 ± 0.005        | 0.695 ± 0.128        | <b>0.986 ± 0.005</b> | all                          |                      |                      |                      |                      |                      |                    |                      |               |               |                      |                |
| RBF-SVM              | 0.975 ± 0.008               | 0.988 ± 0.005        | 0.706 ± 0.117        | <b>0.987 ± 0.004</b> | all                          |                      |                      |                      |                      |                      |                    |                      |               |               |                      |                |
| Random Forests       | <b>0.984 ± 0.009</b>        | <b>0.996 ± 0.005</b> | 0.748 ± 0.159        | <b>0.991 ± 0.005</b> | 3295.4 ± 5665.1              |                      |                      |                      |                      |                      |                    |                      |               |               |                      |                |
| CART <sub>b</sub>    | <b>0.988 ± 0.008</b>        | <b>0.997 ± 0.004</b> | 0.810 ± 0.117        | <b>0.994 ± 0.004</b> | 3.0 ± 0.0                    |                      |                      |                      |                      |                      |                    |                      |               |               |                      |                |
| CART <sub>cv</sub>   | <b>0.983 ± 0.006</b>        | <b>0.991 ± 0.007</b> | 0.824 ± 0.109        | <b>0.991 ± 0.003</b> | 4.5 ± 3.3                    |                      |                      |                      |                      |                      |                    |                      |               |               |                      |                |
| SCM <sub>b</sub>     | <b>0.986 ± 0.008</b>        | <b>0.994 ± 0.006</b> | 0.829 ± 0.110        | <b>0.993 ± 0.004</b> | 3.0 ± 0.5                    |                      |                      |                      |                      |                      |                    |                      |               |               |                      |                |
| SCM <sub>cv</sub>    | <b>0.985 ± 0.008</b>        | <b>0.993 ± 0.007</b> | 0.829 ± 0.110        | <b>0.992 ± 0.004</b> | 3.3 ± 0.8                    |                      |                      |                      |                      |                      |                    |                      |               |               |                      |                |
| aztreonam            | 1805                        | 1582                 | 223                  | 61.1                 | L1-logistic                  |                      |                      |                      |                      |                      | 0.853 ± 0.021      | 0.908 ± 0.015        | 0.464 ± 0.086 | 0.915 ± 0.013 | 12926.6 ± 2079.5     |                |
|                      |                             |                      |                      |                      | L2-logistic                  |                      |                      |                      |                      |                      | 0.884 ± 0.014      | 0.953 ± 0.016        | 0.394 ± 0.093 | 0.935 ± 0.009 | all*                 |                |
|                      |                             |                      |                      |                      | Majority                     |                      |                      |                      |                      |                      | 0.876 ± 0.020      | <b>1.000 ± 0.000</b> | 0.000 ± 0.000 | 0.934 ± 0.011 | –                    |                |
|                      |                             |                      |                      |                      | Naive Bayes                  | 0.693 ± 0.029        | 0.692 ± 0.028        | <b>0.703 ± 0.083</b> | 0.798 ± 0.020        | all                  |                    |                      |               |               |                      |                |
|                      |                             |                      |                      |                      | Poly-SVM                     | 0.904 ± 0.016        | 0.971 ± 0.012        | 0.431 ± 0.065        | <b>0.947 ± 0.009</b> | all                  |                    |                      |               |               |                      |                |
|                      |                             |                      |                      |                      | RBF-SVM                      | <b>0.908 ± 0.014</b> | 0.973 ± 0.010        | 0.446 ± 0.050        | <b>0.949 ± 0.009</b> | all                  |                    |                      |               |               |                      |                |
|                      |                             |                      |                      |                      | Random Forests               | <b>0.916 ± 0.013</b> | 0.982 ± 0.008        | 0.452 ± 0.060        | <b>0.953 ± 0.008</b> | 28793.8 ± 20797.3    |                    |                      |               |               |                      |                |

Continued on next page

**Table S1.** (Continued)

| Species           | Antibiotic    | Genomes       | Resistant     | Susceptible          | <i>k</i> -mers<br>(millions) | Method               | Accuracy             | Sensitivity          | Specificity          | F1 score          | Complexity |
|-------------------|---------------|---------------|---------------|----------------------|------------------------------|----------------------|----------------------|----------------------|----------------------|-------------------|------------|
| cefazolin         | 1895          | 1706          | 189           | 65.6                 | CART <sub>b</sub>            | <b>0.907 ± 0.016</b> | 0.977 ± 0.016        | 0.407 ± 0.090        | <b>0.948 ± 0.010</b> | 5.0 ± 0.7         |            |
|                   |               |               |               |                      | CART <sub>cv</sub>           | 0.901 ± 0.013        | 0.966 ± 0.014        | 0.434 ± 0.106        | <b>0.944 ± 0.008</b> | 7.4 ± 3.3         |            |
|                   |               |               |               |                      | SCM <sub>b</sub>             | <b>0.914 ± 0.013</b> | 0.971 ± 0.007        | 0.510 ± 0.074        | <b>0.952 ± 0.008</b> | 6.4 ± 1.4         |            |
|                   |               |               |               |                      | SCM <sub>cv</sub>            | <b>0.911 ± 0.011</b> | 0.980 ± 0.006        | 0.418 ± 0.082        | <b>0.951 ± 0.007</b> | 12.4 ± 3.2        |            |
|                   |               |               |               |                      | L1-logistic                  | 0.941 ± 0.014        | 0.967 ± 0.012        | 0.705 ± 0.069        | 0.967 ± 0.008        | 7038.1 ± 5605.9   |            |
|                   |               |               |               |                      | L2-logistic                  | 0.939 ± 0.016        | 0.970 ± 0.013        | 0.667 ± 0.097        | 0.966 ± 0.009        | all*              |            |
|                   |               |               |               |                      | Majority                     | 0.901 ± 0.014        | <b>1.000 ± 0.000</b> | 0.000 ± 0.000        | 0.948 ± 0.008        | –                 |            |
|                   |               |               |               |                      | Naive Bayes                  | 0.890 ± 0.026        | 0.908 ± 0.034        | 0.727 ± 0.104        | 0.937 ± 0.017        | all               |            |
|                   |               |               |               |                      | Poly-SVM                     | <b>0.967 ± 0.010</b> | 0.979 ± 0.008        | <b>0.852 ± 0.043</b> | <b>0.982 ± 0.006</b> | all               |            |
|                   |               |               |               |                      | RBF-SVM                      | <b>0.967 ± 0.010</b> | 0.980 ± 0.009        | <b>0.852 ± 0.038</b> | <b>0.982 ± 0.006</b> | all               |            |
|                   |               |               |               |                      | Random Forests               | 0.944 ± 0.014        | 0.975 ± 0.010        | 0.657 ± 0.091        | 0.969 ± 0.008        | 22077.8 ± 15353.5 |            |
|                   |               |               |               |                      | CART <sub>b</sub>            | <b>0.963 ± 0.010</b> | 0.977 ± 0.008        | <b>0.846 ± 0.071</b> | <b>0.980 ± 0.006</b> | 5.1 ± 0.6         |            |
|                   |               |               |               |                      | CART <sub>cv</sub>           | 0.960 ± 0.010        | 0.975 ± 0.008        | 0.831 ± 0.098        | <b>0.978 ± 0.005</b> | 8.1 ± 3.4         |            |
|                   |               |               |               |                      | SCM <sub>b</sub>             | <b>0.970 ± 0.006</b> | 0.983 ± 0.008        | <b>0.853 ± 0.061</b> | <b>0.984 ± 0.004</b> | 6.5 ± 1.0         |            |
| cefepime          | 1650          | 1098          | 552           | 65.3                 | SCM <sub>cv</sub>            | <b>0.969 ± 0.005</b> | 0.983 ± 0.008        | 0.835 ± 0.060        | <b>0.983 ± 0.003</b> | 7.1 ± 1.4         |            |
|                   |               |               |               |                      | L1-logistic                  | 0.766 ± 0.017        | 0.778 ± 0.025        | 0.742 ± 0.047        | 0.817 ± 0.015        | 5579.4 ± 9607.8   |            |
|                   |               |               |               |                      | L2-logistic                  | 0.776 ± 0.023        | 0.785 ± 0.032        | <b>0.758 ± 0.035</b> | 0.825 ± 0.017        | all*              |            |
|                   |               |               |               |                      | Majority                     | 0.672 ± 0.023        | <b>1.000 ± 0.000</b> | 0.000 ± 0.000        | 0.804 ± 0.017        | –                 |            |
|                   |               |               |               |                      | Naive Bayes                  | 0.682 ± 0.031        | 0.653 ± 0.069        | 0.747 ± 0.070        | 0.732 ± 0.035        | all               |            |
|                   |               |               |               |                      | Poly-SVM                     | 0.788 ± 0.021        | 0.874 ± 0.050        | 0.618 ± 0.102        | 0.847 ± 0.017        | all               |            |
|                   |               |               |               |                      | RBF-SVM                      | <b>0.797 ± 0.026</b> | 0.876 ± 0.030        | 0.642 ± 0.085        | <b>0.853 ± 0.019</b> | all               |            |
|                   |               |               |               |                      | Random Forests               | <b>0.806 ± 0.017</b> | 0.878 ± 0.020        | 0.659 ± 0.049        | <b>0.859 ± 0.012</b> | 35037.5 ± 30125.9 |            |
|                   |               |               |               |                      | CART <sub>b</sub>            | 0.786 ± 0.017        | 0.899 ± 0.046        | 0.561 ± 0.064        | 0.849 ± 0.014        | 6.6 ± 1.8         |            |
|                   |               |               |               |                      | CART <sub>cv</sub>           | 0.788 ± 0.020        | 0.897 ± 0.056        | 0.569 ± 0.095        | 0.850 ± 0.017        | 9.4 ± 3.8         |            |
|                   |               |               |               |                      | SCM <sub>b</sub>             | 0.791 ± 0.023        | 0.942 ± 0.026        | 0.483 ± 0.044        | <b>0.858 ± 0.018</b> | 3.0 ± 0.5         |            |
|                   |               |               |               |                      | SCM <sub>cv</sub>            | 0.795 ± 0.020        | 0.952 ± 0.020        | 0.475 ± 0.040        | <b>0.862 ± 0.015</b> | 4.7 ± 1.7         |            |
|                   |               |               |               |                      | L1-logistic                  | 0.857 ± 0.017        | 0.825 ± 0.044        | 0.897 ± 0.050        | 0.864 ± 0.019        | 9038.3 ± 10488.3  |            |
|                   |               |               |               |                      | L2-logistic                  | 0.858 ± 0.025        | 0.840 ± 0.030        | 0.880 ± 0.025        | 0.867 ± 0.026        | all*              |            |
| cefotaxime        | 1789          | 964           | 825           | 62.1                 | Majority                     | 0.552 ± 0.016        | <b>1.000 ± 0.000</b> | 0.000 ± 0.000        | 0.711 ± 0.014        | –                 |            |
|                   |               |               |               |                      | Naive Bayes                  | 0.767 ± 0.026        | 0.810 ± 0.034        | 0.714 ± 0.042        | 0.793 ± 0.024        | all               |            |
|                   |               |               |               |                      | Poly-SVM                     | <b>0.866 ± 0.018</b> | 0.835 ± 0.032        | 0.903 ± 0.023        | <b>0.872 ± 0.020</b> | all               |            |
|                   |               |               |               |                      | RBF-SVM                      | <b>0.871 ± 0.018</b> | 0.833 ± 0.031        | 0.917 ± 0.026        | <b>0.877 ± 0.019</b> | all               |            |
|                   |               |               |               |                      | Random Forests               | <b>0.869 ± 0.020</b> | 0.829 ± 0.040        | 0.918 ± 0.018        | <b>0.874 ± 0.022</b> | 47666.8 ± 49259.7 |            |
|                   |               |               |               |                      | CART <sub>b</sub>            | 0.855 ± 0.018        | 0.778 ± 0.030        | 0.949 ± 0.030        | 0.855 ± 0.021        | 5.2 ± 1.5         |            |
|                   |               |               |               |                      | CART <sub>cv</sub>           | <b>0.869 ± 0.014</b> | 0.820 ± 0.026        | 0.929 ± 0.025        | <b>0.873 ± 0.015</b> | 20.6 ± 5.7        |            |
|                   |               |               |               |                      | SCM <sub>b</sub>             | <b>0.866 ± 0.020</b> | 0.789 ± 0.029        | <b>0.961 ± 0.017</b> | 0.866 ± 0.022        | 6.5 ± 1.2         |            |
|                   |               |               |               |                      | SCM <sub>cv</sub>            | <b>0.872 ± 0.017</b> | 0.819 ± 0.031        | 0.937 ± 0.020        | <b>0.876 ± 0.020</b> | 13.5 ± 3.9        |            |
|                   |               |               |               |                      | L1-logistic                  | <b>0.984 ± 0.009</b> | <b>0.991 ± 0.006</b> | 0.861 ± 0.075        | <b>0.992 ± 0.005</b> | 2833.1 ± 2999.7   |            |
|                   |               |               |               |                      | L2-logistic                  | <b>0.979 ± 0.008</b> | 0.989 ± 0.007        | 0.804 ± 0.075        | <b>0.989 ± 0.004</b> | all*              |            |
|                   |               |               |               |                      | Majority                     | 0.948 ± 0.011        | <b>1.000 ± 0.000</b> | 0.000 ± 0.000        | 0.973 ± 0.006        | –                 |            |
|                   |               |               |               |                      | Naive Bayes                  | 0.777 ± 0.021        | 0.766 ± 0.022        | <b>0.974 ± 0.035</b> | 0.867 ± 0.015        | all               |            |
|                   |               |               |               |                      | Poly-SVM                     | 0.970 ± 0.007        | 0.986 ± 0.005        | 0.653 ± 0.114        | <b>0.984 ± 0.004</b> | all               |            |
| RBF-SVM           | 0.971 ± 0.006 | 0.987 ± 0.006 | 0.662 ± 0.097 | <b>0.985 ± 0.004</b> | all                          |                      |                      |                      |                      |                   |            |
| cefuroxime/sodium | 1560          | 1469          | 91            | 55.6                 | Random Forests               | <b>0.983 ± 0.006</b> | <b>0.994 ± 0.006</b> | 0.780 ± 0.069        | <b>0.991 ± 0.003</b> | 1828.9 ± 3685.9   |            |
|                   |               |               |               |                      | CART <sub>b</sub>            | <b>0.986 ± 0.006</b> | <b>0.996 ± 0.003</b> | 0.788 ± 0.080        | <b>0.992 ± 0.003</b> | 1.0 ± 0.0         |            |

Continued on next page

**Table S1.** (Continued)

| Species            | Antibiotic    | Genomes       | Resistant            | Susceptible   | <i>k</i> -mers<br>(millions) | Method               | Accuracy             | Sensitivity          | Specificity          | F1 score          | Complexity |
|--------------------|---------------|---------------|----------------------|---------------|------------------------------|----------------------|----------------------|----------------------|----------------------|-------------------|------------|
| ceftazidime        | 1983          | 1835          | 148                  | 65.3          | CART <sub>cv</sub>           | <b>0.986 ± 0.006</b> | <b>0.996 ± 0.003</b> | 0.788 ± 0.080        | <b>0.992 ± 0.003</b> | 1.0 ± 0.0         |            |
|                    |               |               |                      |               | SCM <sub>b</sub>             | <b>0.984 ± 0.006</b> | <b>0.995 ± 0.005</b> | 0.788 ± 0.080        | <b>0.992 ± 0.003</b> | 1.2 ± 0.4         |            |
|                    |               |               |                      |               | SCM <sub>cv</sub>            | <b>0.984 ± 0.007</b> | <b>0.995 ± 0.006</b> | 0.788 ± 0.080        | <b>0.992 ± 0.004</b> | 2.1 ± 2.2         |            |
|                    |               |               |                      |               | L1-logistic                  | 0.956 ± 0.010        | 0.976 ± 0.005        | 0.690 ± 0.073        | <b>0.976 ± 0.006</b> | 7469.9 ± 4105.8   |            |
|                    |               |               |                      |               | L2-logistic                  | 0.956 ± 0.011        | 0.979 ± 0.007        | 0.673 ± 0.126        | <b>0.977 ± 0.006</b> | all*              |            |
|                    |               |               |                      |               | Majority                     | 0.930 ± 0.014        | <b>1.000 ± 0.000</b> | 0.000 ± 0.000        | 0.963 ± 0.007        | –                 |            |
|                    |               |               |                      |               | Naive Bayes                  | 0.776 ± 0.025        | 0.765 ± 0.025        | <b>0.916 ± 0.060</b> | 0.863 ± 0.016        | all               |            |
|                    |               |               |                      |               | Poly-SVM                     | <b>0.966 ± 0.009</b> | 0.988 ± 0.005        | 0.675 ± 0.114        | <b>0.982 ± 0.005</b> | all               |            |
|                    |               |               |                      |               | RBF-SVM                      | <b>0.966 ± 0.009</b> | 0.987 ± 0.005        | 0.683 ± 0.108        | <b>0.982 ± 0.005</b> | all               |            |
|                    |               |               |                      |               | Random Forests               | <b>0.965 ± 0.009</b> | <b>0.993 ± 0.003</b> | 0.595 ± 0.105        | <b>0.981 ± 0.005</b> | 23866.7 ± 16647.8 |            |
|                    |               |               |                      |               | CART <sub>b</sub>            | <b>0.957 ± 0.008</b> | 0.988 ± 0.007        | 0.549 ± 0.129        | <b>0.977 ± 0.004</b> | 4.2 ± 1.1         |            |
|                    |               |               |                      |               | CART <sub>cv</sub>           | 0.951 ± 0.006        | 0.980 ± 0.013        | 0.554 ± 0.178        | <b>0.974 ± 0.004</b> | 7.4 ± 2.6         |            |
|                    |               |               |                      |               | SCM <sub>b</sub>             | <b>0.958 ± 0.008</b> | 0.989 ± 0.008        | 0.549 ± 0.146        | <b>0.977 ± 0.004</b> | 4.8 ± 2.1         |            |
|                    |               |               |                      |               | SCM <sub>cv</sub>            | <b>0.959 ± 0.014</b> | 0.984 ± 0.009        | 0.636 ± 0.138        | <b>0.978 ± 0.008</b> | 8.2 ± 3.3         |            |
| ceftriaxone        | 1842          | 1670          | 172                  | 64.7          | L1-logistic                  | 0.972 ± 0.013        | 0.982 ± 0.009        | 0.878 ± 0.079        | <b>0.984 ± 0.007</b> | 3401.8 ± 2110.9   |            |
|                    |               |               |                      |               | L2-logistic                  | 0.969 ± 0.011        | 0.982 ± 0.008        | 0.838 ± 0.068        | <b>0.983 ± 0.006</b> | all*              |            |
|                    |               |               |                      |               | Majority                     | 0.910 ± 0.016        | <b>1.000 ± 0.000</b> | 0.000 ± 0.000        | 0.953 ± 0.009        | –                 |            |
|                    |               |               |                      |               | Naive Bayes                  | 0.927 ± 0.005        | 0.941 ± 0.012        | 0.789 ± 0.115        | 0.959 ± 0.003        | all               |            |
|                    |               |               |                      |               | Poly-SVM                     | <b>0.978 ± 0.007</b> | 0.985 ± 0.007        | <b>0.900 ± 0.033</b> | <b>0.988 ± 0.004</b> | all               |            |
|                    |               |               |                      |               | RBF-SVM                      | <b>0.976 ± 0.008</b> | 0.985 ± 0.007        | 0.886 ± 0.057        | <b>0.987 ± 0.005</b> | all               |            |
|                    |               |               |                      |               | Random Forests               | <b>0.975 ± 0.009</b> | 0.986 ± 0.006        | 0.864 ± 0.061        | <b>0.986 ± 0.005</b> | 7079.7 ± 9997.1   |            |
|                    |               |               |                      |               | CART <sub>b</sub>            | <b>0.980 ± 0.007</b> | 0.990 ± 0.006        | 0.881 ± 0.041        | <b>0.989 ± 0.004</b> | 4.9 ± 0.7         |            |
|                    |               |               |                      |               | CART <sub>cv</sub>           | <b>0.978 ± 0.006</b> | 0.988 ± 0.007        | 0.875 ± 0.042        | <b>0.988 ± 0.003</b> | 8.2 ± 2.0         |            |
|                    |               |               |                      |               | SCM <sub>b</sub>             | <b>0.982 ± 0.007</b> | <b>0.993 ± 0.007</b> | 0.870 ± 0.049        | <b>0.990 ± 0.004</b> | 5.3 ± 0.5         |            |
|                    |               |               |                      |               | SCM <sub>cv</sub>            | <b>0.981 ± 0.006</b> | <b>0.992 ± 0.008</b> | 0.872 ± 0.043        | <b>0.989 ± 0.003</b> | 6.3 ± 0.8         |            |
|                    |               |               |                      |               | L1-logistic                  | 0.952 ± 0.013        | 0.972 ± 0.010        | 0.846 ± 0.038        | 0.972 ± 0.008        | 6018.8 ± 1859.5   |            |
|                    |               |               |                      |               | L2-logistic                  | 0.951 ± 0.012        | 0.965 ± 0.011        | 0.873 ± 0.054        | 0.971 ± 0.008        | all*              |            |
|                    |               |               |                      |               | Majority                     | 0.846 ± 0.021        | <b>1.000 ± 0.000</b> | 0.000 ± 0.000        | 0.916 ± 0.012        | –                 |            |
| Naive Bayes        | 0.884 ± 0.009 | 0.872 ± 0.010 | <b>0.949 ± 0.025</b> | 0.927 ± 0.006 | all                          |                      |                      |                      |                      |                   |            |
| ciprofloxacin      | 2152          | 1817          | 335                  | 71.5          | Poly-SVM                     | 0.960 ± 0.010        | 0.975 ± 0.008        | 0.879 ± 0.036        | <b>0.977 ± 0.006</b> | all               |            |
|                    |               |               |                      |               | RBF-SVM                      | 0.960 ± 0.011        | 0.976 ± 0.008        | 0.875 ± 0.046        | <b>0.976 ± 0.006</b> | all               |            |
|                    |               |               |                      |               | Random Forests               | 0.957 ± 0.010        | 0.976 ± 0.009        | 0.854 ± 0.046        | 0.975 ± 0.006        | 8979.5 ± 12331.8  |            |
|                    |               |               |                      |               | CART <sub>b</sub>            | <b>0.975 ± 0.009</b> | 0.988 ± 0.006        | 0.906 ± 0.046        | <b>0.985 ± 0.005</b> | 5.0 ± 0.9         |            |
|                    |               |               |                      |               | CART <sub>cv</sub>           | <b>0.972 ± 0.010</b> | 0.983 ± 0.008        | 0.913 ± 0.046        | <b>0.983 ± 0.006</b> | 4.9 ± 1.7         |            |
|                    |               |               |                      |               | SCM <sub>b</sub>             | <b>0.974 ± 0.008</b> | 0.984 ± 0.005        | 0.914 ± 0.038        | <b>0.984 ± 0.005</b> | 3.2 ± 0.4         |            |
|                    |               |               |                      |               | SCM <sub>cv</sub>            | <b>0.974 ± 0.007</b> | 0.985 ± 0.005        | 0.916 ± 0.037        | <b>0.985 ± 0.004</b> | 3.6 ± 0.8         |            |
|                    |               |               |                      |               | L1-logistic                  | <b>0.965 ± 0.022</b> | 0.969 ± 0.031        | <b>0.959 ± 0.054</b> | <b>0.978 ± 0.014</b> | 1748.0 ± 2154.3   |            |
|                    |               |               |                      |               | L2-logistic                  | 0.939 ± 0.013        | 0.946 ± 0.018        | 0.923 ± 0.081        | 0.960 ± 0.009        | all*              |            |
|                    |               |               |                      |               | Majority                     | 0.783 ± 0.032        | <b>1.000 ± 0.000</b> | 0.000 ± 0.000        | 0.878 ± 0.020        | –                 |            |
|                    |               |               |                      |               | Naive Bayes                  | 0.831 ± 0.041        | 0.825 ± 0.034        | 0.851 ± 0.106        | 0.884 ± 0.028        | all               |            |
|                    |               |               |                      |               | Poly-SVM                     | <b>0.956 ± 0.016</b> | 0.967 ± 0.019        | 0.919 ± 0.071        | <b>0.972 ± 0.010</b> | all               |            |
|                    |               |               |                      |               | RBF-SVM                      | <b>0.957 ± 0.015</b> | 0.967 ± 0.017        | 0.925 ± 0.052        | <b>0.972 ± 0.010</b> | all               |            |
|                    |               |               |                      |               | Random Forests               | 0.940 ± 0.020        | 0.965 ± 0.022        | 0.862 ± 0.099        | 0.962 ± 0.013        | 6013.6 ± 4539.2   |            |
| CART <sub>b</sub>  | 0.900 ± 0.019 | 0.937 ± 0.031 | 0.777 ± 0.107        | 0.936 ± 0.013 | 2.7 ± 0.8                    |                      |                      |                      |                      |                   |            |
| CART <sub>cv</sub> | 0.924 ± 0.028 | 0.958 ± 0.018 | 0.807 ± 0.130        | 0.952 ± 0.017 | 6.2 ± 1.2                    |                      |                      |                      |                      |                   |            |
| ertapenem          | 361           | 288           | 73                   | 31.8          | L1-logistic                  | <b>0.965 ± 0.022</b> | 0.969 ± 0.031        | <b>0.959 ± 0.054</b> | <b>0.978 ± 0.014</b> | 1748.0 ± 2154.3   |            |
|                    |               |               |                      |               | L2-logistic                  | 0.939 ± 0.013        | 0.946 ± 0.018        | 0.923 ± 0.081        | 0.960 ± 0.009        | all*              |            |
|                    |               |               |                      |               | Majority                     | 0.783 ± 0.032        | <b>1.000 ± 0.000</b> | 0.000 ± 0.000        | 0.878 ± 0.020        | –                 |            |
|                    |               |               |                      |               | Naive Bayes                  | 0.831 ± 0.041        | 0.825 ± 0.034        | 0.851 ± 0.106        | 0.884 ± 0.028        | all               |            |
|                    |               |               |                      |               | Poly-SVM                     | <b>0.956 ± 0.016</b> | 0.967 ± 0.019        | 0.919 ± 0.071        | <b>0.972 ± 0.010</b> | all               |            |
|                    |               |               |                      |               | RBF-SVM                      | <b>0.957 ± 0.015</b> | 0.967 ± 0.017        | 0.925 ± 0.052        | <b>0.972 ± 0.010</b> | all               |            |
|                    |               |               |                      |               | Random Forests               | 0.940 ± 0.020        | 0.965 ± 0.022        | 0.862 ± 0.099        | 0.962 ± 0.013        | 6013.6 ± 4539.2   |            |
|                    |               |               |                      |               | CART <sub>b</sub>            | 0.900 ± 0.019        | 0.937 ± 0.031        | 0.777 ± 0.107        | 0.936 ± 0.013        | 2.7 ± 0.8         |            |
|                    |               |               |                      |               | CART <sub>cv</sub>           | 0.924 ± 0.028        | 0.958 ± 0.018        | 0.807 ± 0.130        | 0.952 ± 0.017        | 6.2 ± 1.2         |            |

Continued on next page

**Table S1.** (Continued)

| Species            | Antibiotic           | Genomes              | Resistant            | Susceptible          | <i>k</i> -mers<br>(millions) | Method               | Accuracy             | Sensitivity          | Specificity          | F1 score          | Complexity           |
|--------------------|----------------------|----------------------|----------------------|----------------------|------------------------------|----------------------|----------------------|----------------------|----------------------|-------------------|----------------------|
| gentamicin         | 2107                 | 906                  | 1201                 | 70.3                 | SCM <sub>b</sub>             | 0.906 ± 0.022        | 0.958 ± 0.031        | 0.721 ± 0.072        | 0.941 ± 0.014        | 2.8 ± 0.6         |                      |
|                    |                      |                      |                      |                      | SCM <sub>cv</sub>            | 0.904 ± 0.031        | 0.951 ± 0.044        | 0.740 ± 0.084        | 0.939 ± 0.021        | 4.5 ± 1.3         |                      |
|                    |                      |                      |                      |                      | L1-logistic                  | <b>0.952 ± 0.010</b> | <b>0.926 ± 0.019</b> | 0.971 ± 0.017        | <b>0.943 ± 0.011</b> | 7607.4 ± 7145.7   |                      |
|                    |                      |                      |                      |                      | L2-logistic                  | <b>0.948 ± 0.008</b> | <b>0.933 ± 0.015</b> | 0.960 ± 0.011        | <b>0.939 ± 0.008</b> | all*              |                      |
|                    |                      |                      |                      |                      | Majority                     | 0.571 ± 0.015        | 0.000 ± 0.000        | <b>1.000 ± 0.000</b> | –                    | –                 |                      |
|                    |                      |                      |                      |                      | Naive Bayes                  | 0.760 ± 0.020        | 0.783 ± 0.027        | 0.743 ± 0.028        | 0.737 ± 0.018        | all               |                      |
|                    |                      |                      |                      |                      | Poly-SVM                     | 0.943 ± 0.006        | 0.922 ± 0.011        | 0.959 ± 0.012        | 0.933 ± 0.008        | all               |                      |
|                    |                      |                      |                      |                      | RBF-SVM                      | 0.943 ± 0.005        | <b>0.925 ± 0.013</b> | 0.957 ± 0.011        | 0.933 ± 0.007        | all               |                      |
|                    |                      |                      |                      |                      | Random Forests               | <b>0.956 ± 0.007</b> | <b>0.932 ± 0.020</b> | 0.974 ± 0.010        | <b>0.948 ± 0.008</b> | 42856.8 ± 31470.4 |                      |
|                    |                      |                      |                      |                      | CART <sub>b</sub>            | <b>0.949 ± 0.007</b> | 0.920 ± 0.025        | 0.972 ± 0.011        | <b>0.940 ± 0.009</b> | 4.3 ± 1.2         |                      |
|                    |                      |                      |                      |                      | CART <sub>cv</sub>           | <b>0.948 ± 0.008</b> | <b>0.931 ± 0.025</b> | 0.961 ± 0.014        | <b>0.939 ± 0.009</b> | 8.8 ± 3.6         |                      |
|                    |                      |                      |                      |                      | SCM <sub>b</sub>             | <b>0.950 ± 0.007</b> | <b>0.924 ± 0.022</b> | 0.970 ± 0.012        | <b>0.941 ± 0.009</b> | 3.9 ± 0.7         |                      |
|                    |                      |                      |                      |                      | SCM <sub>cv</sub>            | <b>0.953 ± 0.009</b> | <b>0.931 ± 0.021</b> | 0.970 ± 0.017        | <b>0.945 ± 0.011</b> | 7.9 ± 2.7         |                      |
|                    |                      |                      |                      |                      | imipenem                     | 1891                 | 660                  | 1231                 | 62.2                 | L1-logistic       | <b>0.949 ± 0.009</b> |
| L2-logistic        | 0.943 ± 0.011        | 0.926 ± 0.021        | 0.953 ± 0.010        | 0.920 ± 0.015        |                              |                      |                      |                      |                      | all*              |                      |
| Majority           | 0.647 ± 0.023        | 0.000 ± 0.000        | <b>1.000 ± 0.000</b> | –                    |                              |                      |                      |                      |                      | –                 |                      |
| Naive Bayes        | 0.771 ± 0.021        | 0.611 ± 0.034        | 0.858 ± 0.019        | 0.652 ± 0.035        |                              |                      |                      |                      |                      | all               |                      |
| Poly-SVM           | <b>0.951 ± 0.008</b> | 0.925 ± 0.015        | 0.964 ± 0.010        | <b>0.930 ± 0.012</b> |                              |                      |                      |                      |                      | all               |                      |
| RBF-SVM            | <b>0.951 ± 0.008</b> | 0.927 ± 0.015        | 0.964 ± 0.010        | <b>0.930 ± 0.013</b> |                              |                      |                      |                      |                      | all               |                      |
| Random Forests     | <b>0.949 ± 0.008</b> | 0.923 ± 0.018        | 0.964 ± 0.011        | <b>0.928 ± 0.013</b> |                              |                      |                      |                      |                      | 38326.0 ± 22322.1 |                      |
| CART <sub>b</sub>  | <b>0.953 ± 0.008</b> | <b>0.933 ± 0.019</b> | 0.964 ± 0.009        | <b>0.934 ± 0.010</b> |                              |                      |                      |                      |                      | 2.3 ± 0.5         |                      |
| CART <sub>cv</sub> | <b>0.954 ± 0.009</b> | <b>0.934 ± 0.020</b> | 0.966 ± 0.010        | <b>0.935 ± 0.012</b> |                              |                      |                      |                      |                      | 3.0 ± 1.1         |                      |
| SCM <sub>b</sub>   | <b>0.955 ± 0.009</b> | <b>0.937 ± 0.014</b> | 0.964 ± 0.010        | <b>0.936 ± 0.011</b> |                              |                      |                      |                      |                      | 2.0 ± 0.0         |                      |
| SCM <sub>cv</sub>  | <b>0.956 ± 0.009</b> | <b>0.939 ± 0.018</b> | 0.964 ± 0.010        | <b>0.937 ± 0.011</b> |                              |                      |                      |                      |                      | 2.6 ± 0.8         |                      |
| L1-logistic        | <b>0.964 ± 0.007</b> | 0.962 ± 0.006        | 0.974 ± 0.029        | <b>0.978 ± 0.004</b> |                              |                      |                      |                      |                      | 969.6 ± 1700.7    |                      |
| L2-logistic        | 0.955 ± 0.010        | 0.959 ± 0.015        | 0.939 ± 0.038        | <b>0.972 ± 0.007</b> |                              |                      |                      |                      |                      | all*              |                      |
| Majority           | 0.807 ± 0.023        | <b>1.000 ± 0.000</b> | 0.000 ± 0.000        | 0.893 ± 0.014        |                              |                      |                      |                      |                      | –                 |                      |
| levofloxacin       | 1824                 | 1462                 | 362                  | 58.6                 | Naive Bayes                  | 0.843 ± 0.029        | 0.808 ± 0.036        | <b>0.990 ± 0.012</b> | 0.892 ± 0.023        | all               |                      |
|                    |                      |                      |                      |                      | Poly-SVM                     | <b>0.960 ± 0.011</b> | 0.967 ± 0.011        | 0.930 ± 0.035        | <b>0.975 ± 0.007</b> | all               |                      |
|                    |                      |                      |                      |                      | RBF-SVM                      | <b>0.961 ± 0.011</b> | 0.967 ± 0.013        | 0.931 ± 0.024        | <b>0.975 ± 0.007</b> | all               |                      |
|                    |                      |                      |                      |                      | Random Forests               | <b>0.960 ± 0.011</b> | 0.965 ± 0.011        | 0.937 ± 0.042        | <b>0.975 ± 0.007</b> | 15165.3 ± 19326.5 |                      |
|                    |                      |                      |                      |                      | CART <sub>b</sub>            | <b>0.964 ± 0.006</b> | 0.977 ± 0.008        | 0.908 ± 0.026        | <b>0.978 ± 0.004</b> | 3.1 ± 1.0         |                      |
|                    |                      |                      |                      |                      | CART <sub>cv</sub>           | <b>0.965 ± 0.007</b> | 0.977 ± 0.008        | 0.915 ± 0.037        | <b>0.978 ± 0.004</b> | 3.1 ± 1.1         |                      |
|                    |                      |                      |                      |                      | SCM <sub>b</sub>             | <b>0.963 ± 0.006</b> | 0.976 ± 0.009        | 0.911 ± 0.031        | <b>0.977 ± 0.004</b> | 2.1 ± 0.3         |                      |
|                    |                      |                      |                      |                      | SCM <sub>cv</sub>            | <b>0.967 ± 0.007</b> | 0.969 ± 0.009        | 0.957 ± 0.019        | <b>0.979 ± 0.004</b> | 3.0 ± 2.9         |                      |
|                    |                      |                      |                      |                      | L1-logistic                  | <b>0.953 ± 0.010</b> | <b>0.924 ± 0.037</b> | 0.967 ± 0.006        | <b>0.928 ± 0.019</b> | 968.5 ± 67.9      |                      |
|                    |                      |                      |                      |                      | L2-logistic                  | <b>0.949 ± 0.008</b> | <b>0.918 ± 0.030</b> | 0.964 ± 0.010        | 0.922 ± 0.015        | all*              |                      |
|                    |                      |                      |                      |                      | Majority                     | 0.671 ± 0.017        | 0.000 ± 0.000        | <b>1.000 ± 0.000</b> | –                    | –                 |                      |
|                    |                      |                      |                      |                      | Naive Bayes                  | 0.813 ± 0.036        | 0.704 ± 0.091        | 0.866 ± 0.020        | 0.710 ± 0.070        | all               |                      |
|                    |                      |                      |                      |                      | Poly-SVM                     | <b>0.953 ± 0.011</b> | 0.908 ± 0.030        | 0.975 ± 0.009        | <b>0.926 ± 0.020</b> | all               |                      |
|                    |                      |                      |                      |                      | RBF-SVM                      | <b>0.951 ± 0.012</b> | 0.908 ± 0.031        | 0.972 ± 0.009        | 0.923 ± 0.022        | all               |                      |
| meropenem          | 2065                 | 684                  | 1381                 | 69.6                 | Random Forests               | <b>0.953 ± 0.010</b> | 0.912 ± 0.031        | 0.973 ± 0.007        | <b>0.927 ± 0.018</b> | 20415.8 ± 24643.6 |                      |
|                    |                      |                      |                      |                      | CART <sub>b</sub>            | <b>0.956 ± 0.011</b> | 0.912 ± 0.030        | 0.978 ± 0.005        | <b>0.932 ± 0.018</b> | 3.0 ± 0.0         |                      |
|                    |                      |                      |                      |                      | CART <sub>cv</sub>           | <b>0.957 ± 0.010</b> | 0.914 ± 0.031        | 0.977 ± 0.006        | <b>0.932 ± 0.019</b> | 2.9 ± 0.6         |                      |
|                    |                      |                      |                      |                      | SCM <sub>b</sub>             | <b>0.957 ± 0.008</b> | <b>0.924 ± 0.026</b> | 0.973 ± 0.006        | <b>0.934 ± 0.015</b> | 2.0 ± 0.0         |                      |

Continued on next page



**Table S1.** (Continued)

| Species                 | Antibiotic           | Genomes              | Resistant            | Susceptible          | <i>k</i> -mers<br>(millions) | Method               | Accuracy             | Sensitivity          | Specificity          | F1 score            | Complexity           |                      |                      |                      |                    |
|-------------------------|----------------------|----------------------|----------------------|----------------------|------------------------------|----------------------|----------------------|----------------------|----------------------|---------------------|----------------------|----------------------|----------------------|----------------------|--------------------|
| nitrofurantoin          | 880                  | 790                  | 90                   | 40.4                 | SCM <sub>cv</sub>            | <b>0.957 ± 0.009</b> | <b>0.925 ± 0.026</b> | 0.973 ± 0.006        | <b>0.934 ± 0.016</b> | 2.1 ± 0.3           |                      |                      |                      |                      |                    |
|                         |                      |                      |                      |                      | L1-logistic                  | 0.894 ± 0.010        | 0.940 ± 0.015        | 0.491 ± 0.148        | 0.940 ± 0.006        | 152112.5 ± 285018.2 |                      |                      |                      |                      |                    |
|                         |                      |                      |                      |                      | L2-logistic                  | 0.907 ± 0.010        | 0.957 ± 0.013        | 0.482 ± 0.100        | 0.949 ± 0.005        | all*                |                      |                      |                      |                      |                    |
|                         |                      |                      |                      |                      | Majority                     | 0.894 ± 0.015        | <b>1.000 ± 0.000</b> | 0.000 ± 0.000        | 0.944 ± 0.008        | –                   |                      |                      |                      |                      |                    |
|                         |                      |                      |                      |                      | Naive Bayes                  | 0.911 ± 0.013        | 0.969 ± 0.019        | 0.416 ± 0.156        | 0.951 ± 0.008        | all                 |                      |                      |                      |                      |                    |
|                         |                      |                      |                      |                      | Poly-SVM                     | <b>0.926 ± 0.026</b> | 0.975 ± 0.015        | 0.512 ± 0.136        | <b>0.959 ± 0.015</b> | all                 |                      |                      |                      |                      |                    |
|                         |                      |                      |                      |                      | RBF-SVM                      | <b>0.929 ± 0.028</b> | 0.976 ± 0.023        | <b>0.525 ± 0.144</b> | <b>0.961 ± 0.016</b> | all                 |                      |                      |                      |                      |                    |
|                         |                      |                      |                      |                      | Random Forests               | <b>0.923 ± 0.019</b> | 0.982 ± 0.010        | 0.412 ± 0.141        | <b>0.958 ± 0.010</b> | 2203.2 ± 3773.1     |                      |                      |                      |                      |                    |
|                         |                      |                      |                      |                      | CART <sub>b</sub>            | 0.912 ± 0.025        | 0.965 ± 0.018        | 0.457 ± 0.116        | 0.951 ± 0.015        | 2.8 ± 0.8           |                      |                      |                      |                      |                    |
|                         |                      |                      |                      |                      | CART <sub>cv</sub>           | 0.914 ± 0.022        | 0.974 ± 0.014        | 0.405 ± 0.179        | <b>0.953 ± 0.012</b> | 2.8 ± 1.5           |                      |                      |                      |                      |                    |
|                         |                      |                      |                      |                      | SCM <sub>b</sub>             | 0.911 ± 0.018        | 0.972 ± 0.009        | 0.393 ± 0.128        | 0.951 ± 0.010        | 2.3 ± 0.5           |                      |                      |                      |                      |                    |
|                         |                      |                      |                      |                      | SCM <sub>cv</sub>            | 0.911 ± 0.017        | 0.970 ± 0.018        | 0.404 ± 0.135        | 0.951 ± 0.010        | 5.5 ± 4.3           |                      |                      |                      |                      |                    |
|                         |                      |                      |                      |                      | ofloxacin                    | 74                   | 47                   | 27                   | 12.4                 | L1-logistic         | 0.821 ± 0.069        | 0.856 ± 0.087        | 0.803 ± 0.178        | 0.840 ± 0.081        | 46375.4 ± 143625.1 |
|                         |                      |                      |                      |                      |                              |                      |                      |                      |                      | L2-logistic         | 0.793 ± 0.109        | 0.792 ± 0.176        | 0.811 ± 0.199        | 0.801 ± 0.133        | all*               |
| Majority                | 0.600 ± 0.155        | <b>1.000 ± 0.000</b> | 0.000 ± 0.000        | 0.739 ± 0.123        |                              |                      |                      |                      |                      | –                   |                      |                      |                      |                      |                    |
| Naive Bayes             | 0.671 ± 0.136        | 0.641 ± 0.201        | 0.778 ± 0.186        | 0.685 ± 0.149        |                              |                      |                      |                      |                      | all                 |                      |                      |                      |                      |                    |
| Poly-SVM                | 0.807 ± 0.126        | 0.847 ± 0.116        | 0.764 ± 0.208        | 0.827 ± 0.119        |                              |                      |                      |                      |                      | all                 |                      |                      |                      |                      |                    |
| RBF-SVM                 | <b>0.850 ± 0.119</b> | 0.884 ± 0.104        | <b>0.825 ± 0.185</b> | <b>0.870 ± 0.101</b> |                              |                      |                      |                      |                      | all                 |                      |                      |                      |                      |                    |
| Random Forests          | 0.829 ± 0.102        | 0.867 ± 0.113        | 0.789 ± 0.207        | 0.853 ± 0.105        |                              |                      |                      |                      |                      | 192.3 ± 192.2       |                      |                      |                      |                      |                    |
| CART <sub>b</sub>       | 0.814 ± 0.090        | 0.878 ± 0.107        | 0.760 ± 0.202        | 0.836 ± 0.096        |                              |                      |                      |                      |                      | 1.4 ± 0.5           |                      |                      |                      |                      |                    |
| CART <sub>cv</sub>      | 0.786 ± 0.075        | 0.836 ± 0.114        | 0.740 ± 0.171        | 0.814 ± 0.075        |                              |                      |                      |                      |                      | 2.0 ± 0.8           |                      |                      |                      |                      |                    |
| SCM <sub>b</sub>        | 0.814 ± 0.090        | 0.878 ± 0.107        | 0.760 ± 0.202        | 0.836 ± 0.096        |                              |                      |                      |                      |                      | 1.4 ± 0.5           |                      |                      |                      |                      |                    |
| SCM <sub>cv</sub>       | 0.786 ± 0.101        | 0.848 ± 0.140        | 0.738 ± 0.160        | 0.811 ± 0.107        |                              |                      |                      |                      |                      | 2.3 ± 0.9           |                      |                      |                      |                      |                    |
| piperacillin/tazobactam | 1734                 | 1184                 | 550                  | 63.6                 |                              |                      |                      |                      |                      | L1-logistic         | 0.862 ± 0.016        | 0.879 ± 0.028        | 0.822 ± 0.061        | 0.897 ± 0.012        | 19247.3 ± 14467.8  |
|                         |                      |                      |                      |                      |                              |                      |                      |                      |                      | L2-logistic         | 0.864 ± 0.011        | 0.884 ± 0.024        | 0.819 ± 0.034        | 0.899 ± 0.009        | all*               |
|                         |                      |                      |                      |                      |                              |                      |                      |                      |                      | Majority            | 0.688 ± 0.022        | <b>1.000 ± 0.000</b> | 0.000 ± 0.000        | 0.815 ± 0.016        | –                  |
|                         |                      |                      |                      |                      | Naive Bayes                  | 0.766 ± 0.015        | 0.759 ± 0.015        | 0.782 ± 0.025        | 0.817 ± 0.014        | all                 |                      |                      |                      |                      |                    |
|                         |                      |                      |                      |                      | Poly-SVM                     | <b>0.886 ± 0.014</b> | 0.921 ± 0.015        | 0.807 ± 0.030        | <b>0.917 ± 0.011</b> | all                 |                      |                      |                      |                      |                    |
|                         |                      |                      |                      |                      | RBF-SVM                      | <b>0.884 ± 0.014</b> | 0.921 ± 0.014        | 0.804 ± 0.027        | <b>0.916 ± 0.011</b> | all                 |                      |                      |                      |                      |                    |
|                         |                      |                      |                      |                      | Random Forests               | 0.876 ± 0.008        | 0.900 ± 0.019        | 0.822 ± 0.036        | <b>0.909 ± 0.008</b> | 47680.8 ± 43218.2   |                      |                      |                      |                      |                    |
|                         |                      |                      |                      |                      | CART <sub>b</sub>            | 0.839 ± 0.012        | 0.865 ± 0.025        | 0.783 ± 0.046        | 0.881 ± 0.011        | 9.8 ± 2.3           |                      |                      |                      |                      |                    |
|                         |                      |                      |                      |                      | CART <sub>cv</sub>           | 0.842 ± 0.014        | 0.873 ± 0.029        | 0.775 ± 0.080        | 0.884 ± 0.010        | 19.7 ± 7.7          |                      |                      |                      |                      |                    |
|                         |                      |                      |                      |                      | SCM <sub>b</sub>             | 0.822 ± 0.019        | 0.876 ± 0.022        | 0.702 ± 0.047        | 0.871 ± 0.015        | 4.5 ± 1.0           |                      |                      |                      |                      |                    |
|                         |                      |                      |                      |                      | SCM <sub>cv</sub>            | 0.829 ± 0.009        | 0.817 ± 0.027        | <b>0.854 ± 0.067</b> | 0.868 ± 0.010        | 15.0 ± 4.5          |                      |                      |                      |                      |                    |
|                         |                      |                      |                      |                      | tetracycline                 | 1553                 | 799                  | 754                  | 56.5                 | L1-logistic         | <b>0.877 ± 0.019</b> | 0.798 ± 0.028        | <b>0.966 ± 0.018</b> | <b>0.872 ± 0.022</b> | 636.6 ± 66.6       |
|                         |                      |                      |                      |                      |                              |                      |                      |                      |                      | L2-logistic         | 0.852 ± 0.039        | 0.817 ± 0.027        | 0.889 ± 0.081        | 0.854 ± 0.032        | all*               |
|                         |                      |                      |                      |                      |                              |                      |                      |                      |                      | Majority            | 0.526 ± 0.013        | <b>1.000 ± 0.000</b> | 0.000 ± 0.000        | 0.689 ± 0.011        | –                  |
| Naive Bayes             | 0.670 ± 0.017        | 0.880 ± 0.016        | 0.435 ± 0.048        | 0.737 ± 0.010        |                              |                      |                      |                      |                      | all                 |                      |                      |                      |                      |                    |
| Poly-SVM                | 0.857 ± 0.019        | 0.818 ± 0.025        | 0.900 ± 0.022        | 0.857 ± 0.019        |                              |                      |                      |                      |                      | all                 |                      |                      |                      |                      |                    |
| RBF-SVM                 | 0.855 ± 0.015        | 0.819 ± 0.028        | 0.895 ± 0.020        | 0.856 ± 0.017        |                              |                      |                      |                      |                      | all                 |                      |                      |                      |                      |                    |
| Random Forests          | <b>0.873 ± 0.022</b> | 0.796 ± 0.027        | 0.958 ± 0.029        | <b>0.868 ± 0.022</b> |                              |                      |                      |                      |                      | 31688.8 ± 26213.0   |                      |                      |                      |                      |                    |
| CART <sub>b</sub>       | <b>0.872 ± 0.017</b> | 0.791 ± 0.026        | <b>0.961 ± 0.026</b> | <b>0.866 ± 0.018</b> |                              |                      |                      |                      |                      | 3.9 ± 0.3           |                      |                      |                      |                      |                    |
| CART <sub>cv</sub>      | <b>0.878 ± 0.013</b> | 0.795 ± 0.029        | <b>0.969 ± 0.017</b> | <b>0.872 ± 0.016</b> |                              |                      |                      |                      |                      | 7.2 ± 7.8           |                      |                      |                      |                      |                    |
| SCM <sub>b</sub>        | <b>0.871 ± 0.018</b> | 0.788 ± 0.026        | <b>0.963 ± 0.026</b> | <b>0.865 ± 0.020</b> |                              |                      |                      |                      |                      | 4.0 ± 0.0           |                      |                      |                      |                      |                    |

Continued on next page

**Table S1.** (Continued)

| Species            | Antibiotic                  | Genomes              | Resistant            | Susceptible          | <i>k</i> -mers<br>(millions) | Method             | Accuracy                       | Sensitivity          | Specificity          | F1 score             | Complexity          |             |                      |                      |                      |                      |                 |
|--------------------|-----------------------------|----------------------|----------------------|----------------------|------------------------------|--------------------|--------------------------------|----------------------|----------------------|----------------------|---------------------|-------------|----------------------|----------------------|----------------------|----------------------|-----------------|
|                    | ticarcillin/clavulanic acid | 170                  | 75                   | 95                   | 26.1                         | SCM <sub>cv</sub>  | <b>0.875 ± 0.016</b>           | 0.796 ± 0.029        | <b>0.962 ± 0.019</b> | <b>0.870 ± 0.019</b> | 8.0 ± 4.1           |             |                      |                      |                      |                      |                 |
|                    |                             |                      |                      |                      |                              | L1-logistic        | 0.953 ± 0.021                  | <b>0.952 ± 0.045</b> | 0.959 ± 0.039        | 0.948 ± 0.029        | 109218.1 ± 254118.1 |             |                      |                      |                      |                      |                 |
|                    |                             |                      |                      |                      |                              | L2-logistic        | <b>0.965 ± 0.030</b>           | <b>0.952 ± 0.060</b> | 0.979 ± 0.027        | <b>0.961 ± 0.035</b> | all*                |             |                      |                      |                      |                      |                 |
|                    |                             |                      |                      |                      |                              | Majority           | 0.526 ± 0.070                  | 0.000 ± 0.000        | <b>1.000 ± 0.000</b> | –                    | –                   |             |                      |                      |                      |                      |                 |
|                    |                             |                      |                      |                      |                              | Naive Bayes        | 0.935 ± 0.052                  | <b>0.951 ± 0.053</b> | 0.924 ± 0.083        | 0.932 ± 0.054        | all                 |             |                      |                      |                      |                      |                 |
|                    |                             |                      |                      |                      |                              | Poly-SVM           | <b>0.962 ± 0.028</b>           | <b>0.945 ± 0.050</b> | 0.979 ± 0.027        | <b>0.958 ± 0.032</b> | all                 |             |                      |                      |                      |                      |                 |
|                    |                             |                      |                      |                      |                              | RBF-SVM            | <b>0.962 ± 0.028</b>           | <b>0.945 ± 0.050</b> | 0.979 ± 0.027        | <b>0.958 ± 0.032</b> | all                 |             |                      |                      |                      |                      |                 |
|                    |                             |                      |                      |                      |                              | Random Forests     | 0.950 ± 0.020                  | <b>0.946 ± 0.041</b> | 0.957 ± 0.045        | 0.947 ± 0.022        | 198.2 ± 190.5       |             |                      |                      |                      |                      |                 |
|                    |                             |                      |                      |                      |                              | CART <sub>b</sub>  | 0.909 ± 0.040                  | 0.896 ± 0.086        | 0.930 ± 0.063        | 0.903 ± 0.041        | 1.0 ± 0.0           |             |                      |                      |                      |                      |                 |
|                    |                             |                      |                      |                      |                              | CART <sub>cv</sub> | 0.921 ± 0.034                  | 0.935 ± 0.061        | 0.912 ± 0.055        | 0.917 ± 0.037        | 2.3 ± 1.3           |             |                      |                      |                      |                      |                 |
|                    |                             |                      |                      |                      |                              | SCM <sub>b</sub>   | 0.912 ± 0.039                  | 0.907 ± 0.075        | 0.924 ± 0.058        | 0.907 ± 0.040        | 1.3 ± 0.5           |             |                      |                      |                      |                      |                 |
|                    |                             |                      |                      |                      |                              | SCM <sub>cv</sub>  | 0.918 ± 0.033                  | 0.917 ± 0.067        | 0.925 ± 0.049        | 0.912 ± 0.038        | 2.2 ± 0.6           |             |                      |                      |                      |                      |                 |
|                    |                             |                      |                      |                      |                              |                    | tobramycin                     | 1693                 | 964                  | 729                  | 64.4                | L1-logistic | <b>0.941 ± 0.011</b> | 0.931 ± 0.016        | <b>0.955 ± 0.021</b> | <b>0.948 ± 0.010</b> | 9322.4 ± 7525.6 |
|                    |                             |                      |                      |                      |                              |                    |                                |                      |                      |                      |                     | L2-logistic | <b>0.941 ± 0.013</b> | 0.926 ± 0.024        | <b>0.962 ± 0.014</b> | <b>0.948 ± 0.013</b> | all*            |
| Majority           | 0.583 ± 0.017               | <b>1.000 ± 0.000</b> | 0.000 ± 0.000        | 0.737 ± 0.014        | –                            |                    |                                |                      |                      |                      |                     |             |                      |                      |                      |                      |                 |
| Naive Bayes        | 0.822 ± 0.022               | 0.755 ± 0.037        | 0.916 ± 0.031        | 0.831 ± 0.020        | all                          |                    |                                |                      |                      |                      |                     |             |                      |                      |                      |                      |                 |
| Poly-SVM           | 0.935 ± 0.013               | 0.939 ± 0.015        | 0.930 ± 0.019        | 0.944 ± 0.011        | all                          |                    |                                |                      |                      |                      |                     |             |                      |                      |                      |                      |                 |
| RBF-SVM            | 0.934 ± 0.012               | 0.936 ± 0.017        | 0.932 ± 0.018        | 0.943 ± 0.011        | all                          |                    |                                |                      |                      |                      |                     |             |                      |                      |                      |                      |                 |
| Random Forests     | <b>0.949 ± 0.013</b>        | 0.944 ± 0.016        | <b>0.957 ± 0.018</b> | <b>0.956 ± 0.011</b> | 10760.1 ± 16650.0            |                    |                                |                      |                      |                      |                     |             |                      |                      |                      |                      |                 |
| CART <sub>b</sub>  | <b>0.944 ± 0.009</b>        | 0.943 ± 0.013        | 0.946 ± 0.016        | <b>0.952 ± 0.008</b> | 5.8 ± 1.8                    |                    |                                |                      |                      |                      |                     |             |                      |                      |                      |                      |                 |
| CART <sub>cv</sub> | <b>0.947 ± 0.011</b>        | 0.954 ± 0.016        | 0.938 ± 0.015        | <b>0.955 ± 0.010</b> | 11.0 ± 4.3                   |                    |                                |                      |                      |                      |                     |             |                      |                      |                      |                      |                 |
| SCM <sub>b</sub>   | 0.938 ± 0.009               | 0.941 ± 0.020        | 0.934 ± 0.013        | <b>0.947 ± 0.009</b> | 3.8 ± 0.6                    |                    |                                |                      |                      |                      |                     |             |                      |                      |                      |                      |                 |
| SCM <sub>cv</sub>  | <b>0.940 ± 0.012</b>        | 0.951 ± 0.020        | 0.925 ± 0.020        | <b>0.949 ± 0.011</b> | 9.1 ± 2.6                    |                    |                                |                      |                      |                      |                     |             |                      |                      |                      |                      |                 |
|                    | trimethoprim                | 188                  | 81                   | 107                  | 35.1                         |                    |                                |                      |                      |                      |                     | L1-logistic | <b>0.954 ± 0.036</b> | 0.906 ± 0.090        | 0.990 ± 0.022        | <b>0.943 ± 0.051</b> | 156.7 ± 20.9    |
|                    |                             |                      |                      |                      |                              |                    |                                |                      |                      |                      |                     | L2-logistic | 0.927 ± 0.042        | <b>0.914 ± 0.061</b> | 0.938 ± 0.043        | 0.915 ± 0.059        | all*            |
|                    |                             |                      |                      |                      |                              |                    |                                |                      |                      |                      |                     | Majority    | 0.551 ± 0.061        | 0.000 ± 0.000        | <b>1.000 ± 0.000</b> | –                    | –               |
|                    |                             |                      |                      |                      |                              | Naive Bayes        | 0.611 ± 0.120                  | <b>0.918 ± 0.069</b> | 0.374 ± 0.192        | 0.681 ± 0.089        | all                 |             |                      |                      |                      |                      |                 |
|                    |                             |                      |                      |                      |                              | Poly-SVM           | 0.857 ± 0.054                  | 0.805 ± 0.089        | 0.902 ± 0.064        | 0.829 ± 0.085        | all                 |             |                      |                      |                      |                      |                 |
|                    |                             |                      |                      |                      |                              | RBF-SVM            | 0.854 ± 0.051                  | 0.793 ± 0.094        | 0.907 ± 0.062        | 0.824 ± 0.082        | all                 |             |                      |                      |                      |                      |                 |
|                    |                             |                      |                      |                      |                              | Random Forests     | 0.932 ± 0.032                  | 0.872 ± 0.084        | 0.981 ± 0.025        | 0.918 ± 0.044        | 1702.8 ± 2378.2     |             |                      |                      |                      |                      |                 |
|                    |                             |                      |                      |                      |                              | CART <sub>b</sub>  | 0.932 ± 0.034                  | 0.879 ± 0.117        | 0.971 ± 0.034        | 0.914 ± 0.063        | 1.1 ± 0.3           |             |                      |                      |                      |                      |                 |
|                    |                             |                      |                      |                      |                              | CART <sub>cv</sub> | 0.932 ± 0.029                  | 0.873 ± 0.096        | 0.974 ± 0.036        | 0.915 ± 0.049        | 1.6 ± 1.0           |             |                      |                      |                      |                      |                 |
|                    |                             |                      |                      |                      |                              | SCM <sub>b</sub>   | 0.938 ± 0.026                  | 0.902 ± 0.074        | 0.967 ± 0.032        | 0.926 ± 0.038        | 1.0 ± 0.0           |             |                      |                      |                      |                      |                 |
|                    |                             |                      |                      |                      |                              | SCM <sub>cv</sub>  | 0.932 ± 0.026                  | 0.869 ± 0.086        | 0.979 ± 0.027        | 0.917 ± 0.040        | 1.8 ± 0.8           |             |                      |                      |                      |                      |                 |
|                    |                             |                      |                      |                      |                              |                    | trimethoprim/sul-famethoxazole | 2129                 | 1587                 | 542                  | 71.3                | L1-logistic | <b>0.935 ± 0.011</b> | 0.949 ± 0.013        | <b>0.893 ± 0.018</b> | <b>0.956 ± 0.008</b> | 669.6 ± 86.5    |
|                    |                             |                      |                      |                      |                              |                    |                                |                      |                      |                      |                     | L2-logistic | 0.924 ± 0.013        | 0.942 ± 0.018        | 0.871 ± 0.041        | 0.949 ± 0.010        | all*            |
|                    |                             |                      |                      |                      |                              |                    |                                |                      |                      |                      |                     | Majority    | 0.752 ± 0.026        | <b>1.000 ± 0.000</b> | 0.000 ± 0.000        | 0.858 ± 0.017        | –               |
| Naive Bayes        | 0.803 ± 0.018               | 0.902 ± 0.019        | 0.504 ± 0.053        | 0.873 ± 0.013        | all                          |                    |                                |                      |                      |                      |                     |             |                      |                      |                      |                      |                 |
| Poly-SVM           | <b>0.933 ± 0.013</b>        | 0.963 ± 0.013        | 0.843 ± 0.031        | <b>0.955 ± 0.010</b> | all                          |                    |                                |                      |                      |                      |                     |             |                      |                      |                      |                      |                 |
| RBF-SVM            | <b>0.932 ± 0.013</b>        | 0.963 ± 0.017        | 0.842 ± 0.034        | <b>0.955 ± 0.010</b> | all                          |                    |                                |                      |                      |                      |                     |             |                      |                      |                      |                      |                 |
| Random Forests     | <b>0.937 ± 0.016</b>        | 0.968 ± 0.014        | 0.846 ± 0.030        | <b>0.959 ± 0.011</b> | 25734.7 ± 20327.6            |                    |                                |                      |                      |                      |                     |             |                      |                      |                      |                      |                 |
| CART <sub>b</sub>  | <b>0.933 ± 0.015</b>        | 0.973 ± 0.012        | 0.813 ± 0.032        | <b>0.956 ± 0.011</b> | 3.3 ± 0.5                    |                    |                                |                      |                      |                      |                     |             |                      |                      |                      |                      |                 |
| CART <sub>cv</sub> | <b>0.932 ± 0.015</b>        | 0.971 ± 0.016        | 0.814 ± 0.034        | <b>0.955 ± 0.011</b> | 5.4 ± 2.9                    |                    |                                |                      |                      |                      |                     |             |                      |                      |                      |                      |                 |

Continued on next page

**Table S1.** (Continued)

| Species                | Antibiotic           | Genomes              | Resistant            | Susceptible          | <i>k</i> -mers<br>(millions) | Method               | Accuracy             | Sensitivity          | Specificity          | F1 score             | Complexity        |
|------------------------|----------------------|----------------------|----------------------|----------------------|------------------------------|----------------------|----------------------|----------------------|----------------------|----------------------|-------------------|
| <i>M. tuberculosis</i> | amikacin             | 1145                 | 208                  | 937                  | 7.6                          | SCM <sub>b</sub>     | <b>0.930 ± 0.015</b> | 0.958 ± 0.017        | 0.845 ± 0.056        | <b>0.953 ± 0.011</b> | 4.0 ± 1.6         |
|                        |                      |                      |                      |                      |                              | SCM <sub>cv</sub>    | <b>0.930 ± 0.012</b> | 0.952 ± 0.010        | 0.863 ± 0.031        | <b>0.953 ± 0.009</b> | 9.3 ± 3.5         |
|                        |                      |                      |                      |                      |                              | L1-logistic          | <b>0.951 ± 0.011</b> | <b>0.802 ± 0.064</b> | 0.987 ± 0.010        | 0.862 ± 0.039        | 17781.3 ± 15688.3 |
|                        |                      |                      |                      |                      |                              | L2-logistic          | 0.918 ± 0.019        | 0.711 ± 0.064        | 0.970 ± 0.026        | 0.771 ± 0.061        | all*              |
|                        |                      |                      |                      |                      |                              | Majority             | 0.803 ± 0.024        | 0.000 ± 0.000        | <b>1.000 ± 0.000</b> | –                    | –                 |
|                        |                      |                      |                      |                      |                              | Naive Bayes          | 0.752 ± 0.042        | 0.668 ± 0.098        | 0.773 ± 0.063        | 0.512 ± 0.063        | all               |
|                        |                      |                      |                      |                      |                              | Poly-SVM             | 0.903 ± 0.021        | 0.613 ± 0.077        | 0.974 ± 0.019        | 0.709 ± 0.074        | all               |
|                        |                      |                      |                      |                      |                              | RBF-SVM              | 0.902 ± 0.026        | 0.613 ± 0.083        | 0.973 ± 0.020        | 0.708 ± 0.085        | all               |
|                        |                      |                      |                      |                      |                              | Random Forests       | 0.941 ± 0.010        | 0.748 ± 0.047        | 0.989 ± 0.012        | 0.832 ± 0.034        | 17558.2 ± 19697.7 |
|                        | CART <sub>b</sub>    | <b>0.958 ± 0.009</b> | <b>0.808 ± 0.056</b> | <b>0.994 ± 0.009</b> | <b>0.881 ± 0.035</b>         | 1.0 ± 0.0            |                      |                      |                      |                      |                   |
|                        | CART <sub>cv</sub>   | <b>0.958 ± 0.009</b> | <b>0.808 ± 0.056</b> | <b>0.994 ± 0.009</b> | <b>0.881 ± 0.035</b>         | 1.0 ± 0.0            |                      |                      |                      |                      |                   |
|                        | SCM <sub>b</sub>     | <b>0.958 ± 0.009</b> | <b>0.808 ± 0.056</b> | <b>0.994 ± 0.009</b> | <b>0.881 ± 0.035</b>         | 1.0 ± 0.0            |                      |                      |                      |                      |                   |
|                        | SCM <sub>cv</sub>    | <b>0.958 ± 0.009</b> | <b>0.808 ± 0.056</b> | <b>0.994 ± 0.009</b> | <b>0.881 ± 0.035</b>         | 1.0 ± 0.0            |                      |                      |                      |                      |                   |
|                        | amoxicillin          | 766                  | 25                   | 741                  | 7.3                          | L1-logistic          | <b>0.981 ± 0.012</b> | 0.585 ± 0.322        | <b>0.993 ± 0.007</b> | –                    | 1345.2 ± 331.0    |
|                        |                      |                      |                      |                      |                              | L2-logistic          | 0.974 ± 0.012        | 0.261 ± 0.243        | <b>0.993 ± 0.005</b> | –                    | all*              |
|                        |                      |                      |                      |                      |                              | Majority             | 0.974 ± 0.012        | 0.000 ± 0.000        | <b>1.000 ± 0.000</b> | –                    | –                 |
|                        |                      |                      |                      |                      |                              | Naive Bayes          | 0.962 ± 0.014        | 0.000 ± 0.000        | 0.988 ± 0.007        | –                    | all               |
|                        |                      |                      |                      |                      |                              | Poly-SVM             | <b>0.975 ± 0.014</b> | 0.212 ± 0.322        | <b>0.996 ± 0.006</b> | –                    | all               |
|                        |                      |                      |                      |                      |                              | RBF-SVM              | <b>0.975 ± 0.015</b> | 0.187 ± 0.328        | <b>0.996 ± 0.006</b> | –                    | all               |
| Random Forests         |                      |                      |                      |                      |                              | 0.972 ± 0.012        | 0.245 ± 0.249        | <b>0.992 ± 0.009</b> | –                    | 3351.2 ± 4778.6      |                   |
| CART <sub>b</sub>      |                      |                      |                      |                      |                              | <b>0.980 ± 0.013</b> | 0.643 ± 0.370        | <b>0.991 ± 0.006</b> | –                    | 0.9 ± 0.3            |                   |
| CART <sub>cv</sub>     |                      |                      |                      |                      |                              | <b>0.983 ± 0.008</b> | 0.693 ± 0.301        | <b>0.991 ± 0.006</b> | –                    | 1.1 ± 0.3            |                   |
| capreomycin            | 1123                 | 204                  | 919                  | 7.7                  | SCM <sub>b</sub>             | <b>0.984 ± 0.007</b> | <b>0.718 ± 0.294</b> | <b>0.991 ± 0.006</b> | –                    | 1.0 ± 0.0            |                   |
|                        |                      |                      |                      |                      | SCM <sub>cv</sub>            | <b>0.984 ± 0.007</b> | 0.618 ± 0.352        | <b>0.993 ± 0.006</b> | –                    | 1.4 ± 0.7            |                   |
|                        |                      |                      |                      |                      | L1-logistic                  | <b>0.932 ± 0.020</b> | 0.772 ± 0.056        | 0.971 ± 0.013        | 0.813 ± 0.044        | 34525.0 ± 17931.7    |                   |
|                        |                      |                      |                      |                      | L2-logistic                  | 0.902 ± 0.022        | 0.640 ± 0.074        | 0.965 ± 0.019        | 0.712 ± 0.057        | all*                 |                   |
|                        |                      |                      |                      |                      | Majority                     | 0.810 ± 0.026        | 0.000 ± 0.000        | <b>1.000 ± 0.000</b> | –                    | –                    |                   |
|                        |                      |                      |                      |                      | Naive Bayes                  | 0.783 ± 0.027        | 0.617 ± 0.083        | 0.823 ± 0.023        | 0.517 ± 0.058        | all                  |                   |
|                        |                      |                      |                      |                      | Poly-SVM                     | 0.889 ± 0.021        | 0.608 ± 0.063        | 0.955 ± 0.014        | 0.674 ± 0.050        | all                  |                   |
|                        |                      |                      |                      |                      | RBF-SVM                      | 0.891 ± 0.022        | 0.601 ± 0.070        | 0.960 ± 0.012        | 0.676 ± 0.059        | all                  |                   |
|                        |                      |                      |                      |                      | Random Forests               | 0.909 ± 0.026        | 0.612 ± 0.077        | 0.980 ± 0.016        | 0.719 ± 0.072        | 15086.7 ± 18855.0    |                   |
| ciprofloxacin          | 336                  | 35                   | 301                  | 5.1                  | CART <sub>b</sub>            | <b>0.938 ± 0.014</b> | <b>0.796 ± 0.065</b> | 0.972 ± 0.011        | <b>0.829 ± 0.035</b> | 1.5 ± 0.5            |                   |
|                        |                      |                      |                      |                      | CART <sub>cv</sub>           | <b>0.938 ± 0.014</b> | <b>0.793 ± 0.075</b> | 0.972 ± 0.014        | <b>0.828 ± 0.040</b> | 1.9 ± 1.0            |                   |
|                        |                      |                      |                      |                      | SCM <sub>b</sub>             | <b>0.938 ± 0.014</b> | <b>0.787 ± 0.062</b> | 0.975 ± 0.010        | <b>0.829 ± 0.034</b> | 1.8 ± 0.4            |                   |
|                        |                      |                      |                      |                      | SCM <sub>cv</sub>            | <b>0.937 ± 0.014</b> | <b>0.791 ± 0.058</b> | 0.972 ± 0.010        | <b>0.826 ± 0.031</b> | 3.5 ± 3.2            |                   |
|                        |                      |                      |                      |                      | L1-logistic                  | 0.973 ± 0.020        | 0.902 ± 0.132        | 0.979 ± 0.022        | 0.854 ± 0.095        | 734.6 ± 627.2        |                   |
|                        |                      |                      |                      |                      | L2-logistic                  | 0.940 ± 0.031        | 0.650 ± 0.194        | 0.968 ± 0.022        | 0.631 ± 0.157        | all*                 |                   |
|                        |                      |                      |                      |                      | Majority                     | 0.921 ± 0.022        | 0.000 ± 0.000        | <b>1.000 ± 0.000</b> | –                    | –                    |                   |
|                        |                      |                      |                      |                      | Naive Bayes                  | 0.912 ± 0.022        | 0.039 ± 0.087        | 0.987 ± 0.010        | –                    | all                  |                   |
|                        |                      |                      |                      |                      | Poly-SVM                     | 0.951 ± 0.027        | 0.675 ± 0.208        | 0.977 ± 0.020        | 0.684 ± 0.160        | all                  |                   |
| RBF-SVM                | 0.936 ± 0.037        | 0.559 ± 0.289        | 0.972 ± 0.027        | –                    | all                          |                      |                      |                      |                      |                      |                   |
| Random Forests         | 0.969 ± 0.027        | 0.694 ± 0.248        | <b>0.995 ± 0.008</b> | 0.769 ± 0.211        | 932.2 ± 572.8                |                      |                      |                      |                      |                      |                   |
| CART <sub>b</sub>      | <b>0.982 ± 0.009</b> | <b>0.935 ± 0.106</b> | 0.985 ± 0.009        | 0.888 ± 0.065        | 1.1 ± 0.3                    |                      |                      |                      |                      |                      |                   |
| CART <sub>cv</sub>     | <b>0.984 ± 0.011</b> | 0.918 ± 0.107        | 0.989 ± 0.011        | <b>0.901 ± 0.072</b> | 1.9 ± 0.9                    |                      |                      |                      |                      |                      |                   |
| SCM <sub>b</sub>       | <b>0.982 ± 0.009</b> | 0.918 ± 0.107        | 0.987 ± 0.010        | 0.886 ± 0.064        | 1.3 ± 0.5                    |                      |                      |                      |                      |                      |                   |

Continued on next page

**Table S1.** (Continued)

| Species     | Antibiotic | Genomes | Resistant | Susceptible | <i>k</i> -mers<br>(millions) | Method             | Accuracy             | Sensitivity          | Specificity          | F1 score             | Complexity          |
|-------------|------------|---------|-----------|-------------|------------------------------|--------------------|----------------------|----------------------|----------------------|----------------------|---------------------|
| cycloserine |            |         | 72        | 264         | 4.8                          | SCM <sub>cv</sub>  | <b>0.981 ± 0.010</b> | 0.885 ± 0.129        | 0.987 ± 0.010        | 0.867 ± 0.095        | 1.5 ± 0.5           |
|             |            |         |           |             |                              | L1-logistic        | 0.842 ± 0.028        | <b>0.618 ± 0.109</b> | 0.893 ± 0.035        | <b>0.582 ± 0.094</b> | 318306.1 ± 239638.1 |
|             |            |         |           |             |                              | L2-logistic        | 0.839 ± 0.034        | 0.461 ± 0.188        | 0.919 ± 0.043        | 0.491 ± 0.172        | all*                |
|             |            |         |           |             |                              | Majority           | 0.815 ± 0.045        | 0.000 ± 0.000        | <b>1.000 ± 0.000</b> | –                    | –                   |
|             |            |         |           |             |                              | Naive Bayes        | 0.813 ± 0.047        | 0.005 ± 0.017        | <b>0.996 ± 0.009</b> | –                    | all                 |
|             |            |         |           |             |                              | Poly-SVM           | 0.828 ± 0.030        | 0.527 ± 0.094        | 0.898 ± 0.041        | 0.525 ± 0.092        | all                 |
|             |            |         |           |             |                              | RBF-SVM            | <b>0.858 ± 0.041</b> | 0.356 ± 0.108        | 0.970 ± 0.023        | 0.475 ± 0.128        | all                 |
|             |            |         |           |             |                              | Random Forests     | <b>0.860 ± 0.027</b> | 0.417 ± 0.141        | 0.960 ± 0.029        | 0.507 ± 0.115        | 8661.1 ± 11376.0    |
|             |            |         |           |             |                              | CART <sub>b</sub>  | 0.812 ± 0.043        | 0.020 ± 0.063        | <b>0.993 ± 0.022</b> | –                    | 0.3 ± 0.9           |
|             |            |         |           |             |                              | CART <sub>cv</sub> | 0.830 ± 0.043        | 0.418 ± 0.130        | 0.922 ± 0.058        | 0.468 ± 0.150        | 12.7 ± 9.5          |
|             |            |         |           |             |                              | SCM <sub>b</sub>   | 0.800 ± 0.039        | 0.137 ± 0.083        | 0.953 ± 0.043        | 0.190 ± 0.083        | 1.5 ± 0.5           |
|             |            |         |           |             |                              | SCM <sub>cv</sub>  | 0.822 ± 0.040        | 0.302 ± 0.152        | 0.942 ± 0.056        | 0.365 ± 0.104        | 6.5 ± 5.4           |
|             |            |         |           |             |                              | L1-logistic        | <b>0.924 ± 0.007</b> | 0.760 ± 0.059        | 0.955 ± 0.015        | 0.761 ± 0.024        | 54872.7 ± 37237.7   |
|             |            |         |           |             |                              | L2-logistic        | <b>0.924 ± 0.010</b> | <b>0.773 ± 0.070</b> | 0.952 ± 0.013        | 0.762 ± 0.033        | all*                |
|             |            |         |           |             |                              | Majority           | 0.841 ± 0.006        | 0.000 ± 0.000        | <b>1.000 ± 0.000</b> | –                    | –                   |
| ethambutol  |            | 4780    | 748       | 4032        | 11.6                         | Naive Bayes        | 0.823 ± 0.013        | <b>0.769 ± 0.053</b> | 0.833 ± 0.010        | 0.579 ± 0.035        | all                 |
|             |            |         |           |             |                              | Poly-SVM           | <b>0.925 ± 0.011</b> | 0.722 ± 0.055        | 0.963 ± 0.005        | 0.752 ± 0.041        | all                 |
|             |            |         |           |             |                              | RBF-SVM            | 0.922 ± 0.011        | 0.705 ± 0.068        | 0.963 ± 0.005        | 0.740 ± 0.045        | all                 |
|             |            |         |           |             |                              | Random Forests     | <b>0.933 ± 0.011</b> | 0.752 ± 0.045        | 0.967 ± 0.006        | <b>0.781 ± 0.037</b> | 55934.9 ± 51887.2   |
|             |            |         |           |             |                              | CART <sub>b</sub>  | <b>0.926 ± 0.010</b> | 0.764 ± 0.053        | 0.956 ± 0.007        | 0.765 ± 0.036        | 13.2 ± 2.1          |
|             |            |         |           |             |                              | CART <sub>cv</sub> | <b>0.924 ± 0.012</b> | <b>0.774 ± 0.067</b> | 0.952 ± 0.008        | 0.762 ± 0.045        | 20.7 ± 8.0          |
|             |            |         |           |             |                              | SCM <sub>b</sub>   | 0.920 ± 0.006        | 0.743 ± 0.056        | 0.953 ± 0.013        | 0.745 ± 0.020        | 5.7 ± 1.2           |
|             |            |         |           |             |                              | SCM <sub>cv</sub>  | 0.923 ± 0.007        | <b>0.766 ± 0.040</b> | 0.952 ± 0.011        | 0.758 ± 0.018        | 10.2 ± 2.3          |
|             |            |         |           |             |                              | L1-logistic        | 0.781 ± 0.043        | 0.695 ± 0.058        | 0.836 ± 0.046        | <b>0.709 ± 0.052</b> | 7671.6 ± 13150.6    |
|             |            |         |           |             |                              | L2-logistic        | 0.739 ± 0.047        | <b>0.726 ± 0.079</b> | 0.746 ± 0.104        | 0.681 ± 0.043        | all*                |
|             |            |         |           |             |                              | Majority           | 0.616 ± 0.032        | 0.000 ± 0.000        | <b>1.000 ± 0.000</b> | –                    | –                   |
|             |            |         |           |             |                              | Naive Bayes        | 0.688 ± 0.060        | 0.570 ± 0.115        | 0.762 ± 0.134        | 0.581 ± 0.062        | all                 |
|             |            |         |           |             |                              | Poly-SVM           | 0.779 ± 0.028        | 0.623 ± 0.057        | 0.875 ± 0.031        | 0.682 ± 0.042        | all                 |
|             |            |         |           |             |                              | RBF-SVM            | 0.786 ± 0.029        | 0.630 ± 0.067        | 0.882 ± 0.033        | 0.691 ± 0.048        | all                 |
|             |            |         |           |             |                              | Random Forests     | <b>0.798 ± 0.036</b> | 0.592 ± 0.073        | 0.925 ± 0.041        | 0.691 ± 0.054        | 29885.4 ± 18585.0   |
| ethionamide |            | 564     | 210       | 354         | 5.0                          | CART <sub>b</sub>  | 0.781 ± 0.024        | 0.616 ± 0.062        | 0.884 ± 0.035        | 0.682 ± 0.042        | 2.5 ± 0.5           |
|             |            |         |           |             |                              | CART <sub>cv</sub> | 0.782 ± 0.046        | 0.674 ± 0.078        | 0.849 ± 0.069        | <b>0.703 ± 0.062</b> | 25.3 ± 14.0         |
|             |            |         |           |             |                              | SCM <sub>b</sub>   | 0.771 ± 0.026        | 0.605 ± 0.090        | 0.876 ± 0.072        | 0.667 ± 0.043        | 2.2 ± 0.4           |
|             |            |         |           |             |                              | SCM <sub>cv</sub>  | 0.762 ± 0.032        | 0.601 ± 0.092        | 0.863 ± 0.091        | 0.658 ± 0.042        | 5.0 ± 1.9           |
|             |            |         |           |             |                              | L1-logistic        | <b>0.962 ± 0.004</b> | 0.921 ± 0.012        | 0.984 ± 0.005        | <b>0.944 ± 0.006</b> | 2242.2 ± 202.1      |
|             |            |         |           |             |                              | L2-logistic        | 0.941 ± 0.005        | 0.865 ± 0.016        | 0.981 ± 0.006        | 0.910 ± 0.007        | all*                |
|             |            |         |           |             |                              | Majority           | 0.658 ± 0.011        | 0.000 ± 0.000        | <b>1.000 ± 0.000</b> | –                    | –                   |
|             |            |         |           |             |                              | Naive Bayes        | 0.789 ± 0.011        | 0.697 ± 0.033        | 0.837 ± 0.010        | 0.693 ± 0.024        | all                 |
|             |            |         |           |             |                              | Poly-SVM           | 0.934 ± 0.007        | 0.845 ± 0.019        | 0.980 ± 0.005        | 0.897 ± 0.011        | all                 |
|             |            |         |           |             |                              | RBF-SVM            | 0.930 ± 0.007        | 0.849 ± 0.016        | 0.973 ± 0.004        | 0.893 ± 0.010        | all                 |
|             |            |         |           |             |                              | Random Forests     | <b>0.962 ± 0.006</b> | 0.920 ± 0.016        | 0.984 ± 0.004        | <b>0.944 ± 0.009</b> | 78761.3 ± 44953.9   |
|             |            |         |           |             |                              | CART <sub>b</sub>  | <b>0.962 ± 0.004</b> | <b>0.935 ± 0.011</b> | 0.976 ± 0.008        | <b>0.944 ± 0.005</b> | 4.7 ± 1.2           |
|             |            |         |           |             |                              | CART <sub>cv</sub> | <b>0.963 ± 0.004</b> | <b>0.943 ± 0.010</b> | 0.973 ± 0.007        | <b>0.945 ± 0.006</b> | 5.9 ± 2.6           |
|             |            |         |           |             |                              | SCM <sub>b</sub>   | <b>0.963 ± 0.005</b> | <b>0.936 ± 0.016</b> | 0.977 ± 0.009        | <b>0.945 ± 0.007</b> | 4.5 ± 0.5           |
|             |            |         |           |             |                              | SCM <sub>cv</sub>  | <b>0.963 ± 0.004</b> | <b>0.941 ± 0.013</b> | 0.975 ± 0.008        | <b>0.946 ± 0.006</b> | 5.0 ± 1.7           |

Continued on next page

**Table S1.** (Continued)

| Species            | Antibiotic               | Genomes              | Resistant            | Susceptible          | <i>k</i> -mers<br>(millions) | Method             | Accuracy             | Sensitivity          | Specificity          | F1 score             | Complexity        |               |                      |                      |                      |                      |                   |
|--------------------|--------------------------|----------------------|----------------------|----------------------|------------------------------|--------------------|----------------------|----------------------|----------------------|----------------------|-------------------|---------------|----------------------|----------------------|----------------------|----------------------|-------------------|
|                    | kanamycin                | 1355                 | 297                  | 1058                 | 7.6                          | L1-logicistic      | 0.947 ± 0.010        | <b>0.842 ± 0.037</b> | 0.976 ± 0.007        | 0.874 ± 0.024        | 9464.5 ± 18157.1  |               |                      |                      |                      |                      |                   |
|                    |                          |                      |                      |                      |                              | L2-logicistic      | 0.895 ± 0.029        | 0.774 ± 0.060        | 0.929 ± 0.050        | 0.766 ± 0.040        | all*              |               |                      |                      |                      |                      |                   |
|                    |                          |                      |                      |                      |                              | Majority           | 0.781 ± 0.012        | 0.000 ± 0.000        | <b>1.000 ± 0.000</b> | –                    | –                 |               |                      |                      |                      |                      |                   |
|                    |                          |                      |                      |                      |                              | Naive Bayes        | 0.764 ± 0.022        | 0.773 ± 0.027        | 0.762 ± 0.025        | 0.590 ± 0.033        | all               |               |                      |                      |                      |                      |                   |
|                    |                          |                      |                      |                      |                              | Poly-SVM           | 0.907 ± 0.010        | 0.714 ± 0.033        | 0.961 ± 0.012        | 0.770 ± 0.023        | all               |               |                      |                      |                      |                      |                   |
|                    |                          |                      |                      |                      |                              | RBF-SVM            | 0.911 ± 0.013        | 0.722 ± 0.026        | 0.965 ± 0.014        | 0.782 ± 0.026        | all               |               |                      |                      |                      |                      |                   |
|                    |                          |                      |                      |                      |                              | Random Forests     | 0.928 ± 0.010        | 0.754 ± 0.031        | 0.977 ± 0.009        | 0.822 ± 0.025        | 45035.8 ± 13637.5 |               |                      |                      |                      |                      |                   |
|                    |                          |                      |                      |                      |                              | CART <sub>b</sub>  | <b>0.957 ± 0.011</b> | <b>0.844 ± 0.040</b> | 0.989 ± 0.006        | <b>0.895 ± 0.025</b> | 3.0 ± 0.0         |               |                      |                      |                      |                      |                   |
|                    |                          |                      |                      |                      |                              | CART <sub>cv</sub> | <b>0.957 ± 0.011</b> | <b>0.844 ± 0.040</b> | 0.989 ± 0.006        | <b>0.895 ± 0.025</b> | 3.0 ± 0.0         |               |                      |                      |                      |                      |                   |
|                    |                          |                      |                      |                      |                              | SCM <sub>b</sub>   | <b>0.949 ± 0.012</b> | <b>0.844 ± 0.040</b> | 0.979 ± 0.008        | 0.880 ± 0.028        | 2.0 ± 0.0         |               |                      |                      |                      |                      |                   |
|                    |                          |                      |                      |                      |                              | SCM <sub>cv</sub>  | <b>0.949 ± 0.013</b> | <b>0.845 ± 0.038</b> | 0.978 ± 0.010        | 0.879 ± 0.029        | 2.1 ± 0.3         |               |                      |                      |                      |                      |                   |
|                    |                          |                      |                      |                      |                              |                    | moxifloxacin         | 699                  | 57                   | 642                  | 7.2               | L1-logicistic | <b>0.953 ± 0.017</b> | 0.722 ± 0.123        | 0.976 ± 0.017        | 0.729 ± 0.097        | 6834.6 ± 7712.5   |
|                    |                          |                      |                      |                      |                              |                    |                      |                      |                      |                      |                   | L2-logicistic | 0.933 ± 0.021        | 0.457 ± 0.131        | 0.980 ± 0.013        | 0.543 ± 0.143        | all*              |
|                    |                          |                      |                      |                      |                              |                    |                      |                      |                      |                      |                   | Majority      | 0.911 ± 0.018        | 0.000 ± 0.000        | <b>1.000 ± 0.000</b> | –                    | –                 |
|                    |                          |                      |                      |                      |                              |                    |                      |                      |                      |                      |                   | Naive Bayes   | 0.883 ± 0.025        | 0.110 ± 0.107        | 0.961 ± 0.024        | –                    | all               |
| Poly-SVM           | 0.924 ± 0.012            | 0.231 ± 0.145        | 0.990 ± 0.009        | –                    | all                          |                    |                      |                      |                      |                      |                   |               |                      |                      |                      |                      |                   |
| RBF-SVM            | 0.927 ± 0.014            | 0.249 ± 0.142        | <b>0.991 ± 0.008</b> | –                    | all                          |                    |                      |                      |                      |                      |                   |               |                      |                      |                      |                      |                   |
| Random Forests     | 0.932 ± 0.014            | 0.328 ± 0.117        | <b>0.991 ± 0.015</b> | 0.453 ± 0.137        | 9679.0 ± 9024.3              |                    |                      |                      |                      |                      |                   |               |                      |                      |                      |                      |                   |
| CART <sub>b</sub>  | <b>0.957 ± 0.020</b>     | 0.844 ± 0.162        | 0.968 ± 0.014        | 0.769 ± 0.117        | 1.1 ± 0.3                    |                    |                      |                      |                      |                      |                   |               |                      |                      |                      |                      |                   |
| CART <sub>cv</sub> | <b>0.960 ± 0.014</b>     | <b>0.860 ± 0.149</b> | 0.969 ± 0.015        | <b>0.782 ± 0.099</b> | 1.1 ± 0.3                    |                    |                      |                      |                      |                      |                   |               |                      |                      |                      |                      |                   |
| SCM <sub>b</sub>   | 0.950 ± 0.017            | 0.771 ± 0.185        | 0.969 ± 0.014        | 0.725 ± 0.109        | 1.4 ± 0.5                    |                    |                      |                      |                      |                      |                   |               |                      |                      |                      |                      |                   |
| SCM <sub>cv</sub>  | <b>0.960 ± 0.014</b>     | <b>0.854 ± 0.118</b> | 0.970 ± 0.016        | <b>0.785 ± 0.075</b> | 1.4 ± 1.3                    |                    |                      |                      |                      |                      |                   |               |                      |                      |                      |                      |                   |
|                    | nicotinamide             | 167                  | 84                   | 83                   | 4.6                          |                    |                      |                      |                      |                      |                   | L1-logicistic | 0.803 ± 0.098        | 0.724 ± 0.119        | 0.888 ± 0.123        | 0.791 ± 0.095        | 17764.3 ± 54250.8 |
|                    |                          |                      |                      |                      |                              |                    |                      |                      |                      |                      |                   | L2-logicistic | 0.730 ± 0.097        | 0.671 ± 0.079        | 0.782 ± 0.155        | 0.725 ± 0.076        | all*              |
|                    |                          |                      |                      |                      |                              |                    |                      |                      |                      |                      |                   | Majority      | 0.433 ± 0.038        | 0.400 ± 0.516        | 0.600 ± 0.516        | –                    | –                 |
|                    |                          |                      |                      |                      |                              |                    |                      |                      |                      |                      |                   | Naive Bayes   | 0.618 ± 0.128        | 0.455 ± 0.271        | 0.826 ± 0.153        | –                    | all               |
|                    |                          |                      |                      |                      |                              | Poly-SVM           | 0.752 ± 0.114        | <b>0.783 ± 0.131</b> | 0.715 ± 0.140        | 0.767 ± 0.096        | all               |               |                      |                      |                      |                      |                   |
|                    |                          |                      |                      |                      |                              | RBF-SVM            | 0.758 ± 0.111        | <b>0.774 ± 0.137</b> | 0.742 ± 0.113        | 0.769 ± 0.094        | all               |               |                      |                      |                      |                      |                   |
|                    |                          |                      |                      |                      |                              | Random Forests     | 0.736 ± 0.078        | 0.648 ± 0.108        | 0.839 ± 0.083        | 0.718 ± 0.076        | 4379.0 ± 5821.1   |               |                      |                      |                      |                      |                   |
|                    |                          |                      |                      |                      |                              | CART <sub>b</sub>  | <b>0.842 ± 0.057</b> | 0.746 ± 0.090        | <b>0.952 ± 0.045</b> | <b>0.828 ± 0.066</b> | 1.0 ± 0.0         |               |                      |                      |                      |                      |                   |
|                    |                          |                      |                      |                      |                              | CART <sub>cv</sub> | <b>0.836 ± 0.063</b> | 0.746 ± 0.090        | 0.939 ± 0.058        | <b>0.823 ± 0.069</b> | 1.3 ± 0.7         |               |                      |                      |                      |                      |                   |
|                    |                          |                      |                      |                      |                              | SCM <sub>b</sub>   | <b>0.842 ± 0.057</b> | 0.746 ± 0.090        | <b>0.952 ± 0.045</b> | <b>0.828 ± 0.066</b> | 1.0 ± 0.0         |               |                      |                      |                      |                      |                   |
|                    |                          |                      |                      |                      |                              | SCM <sub>cv</sub>  | 0.821 ± 0.063        | 0.734 ± 0.099        | 0.919 ± 0.082        | 0.807 ± 0.070        | 2.0 ± 1.2         |               |                      |                      |                      |                      |                   |
|                    |                          |                      |                      |                      |                              |                    | ofloxacin            | 851                  | 307                  | 544                  | 5.1               | L1-logicistic | <b>0.935 ± 0.017</b> | <b>0.888 ± 0.019</b> | 0.963 ± 0.025        | <b>0.912 ± 0.018</b> | 193.9 ± 24.5      |
|                    |                          |                      |                      |                      |                              |                    |                      |                      |                      |                      |                   | L2-logicistic | 0.828 ± 0.029        | 0.802 ± 0.055        | 0.844 ± 0.037        | 0.776 ± 0.029        | all*              |
|                    |                          |                      |                      |                      |                              |                    |                      |                      |                      |                      |                   | Majority      | 0.628 ± 0.031        | 0.000 ± 0.000        | <b>1.000 ± 0.000</b> | –                    | –                 |
|                    |                          |                      |                      |                      |                              |                    |                      |                      |                      |                      |                   | Naive Bayes   | 0.672 ± 0.031        | 0.275 ± 0.155        | 0.907 ± 0.067        | 0.357 ± 0.166        | all               |
| Poly-SVM           | 0.848 ± 0.026            | 0.791 ± 0.046        | 0.883 ± 0.027        | 0.795 ± 0.033        | all                          |                    |                      |                      |                      |                      |                   |               |                      |                      |                      |                      |                   |
| RBF-SVM            | 0.844 ± 0.025            | 0.782 ± 0.043        | 0.881 ± 0.026        | 0.788 ± 0.029        | all                          |                    |                      |                      |                      |                      |                   |               |                      |                      |                      |                      |                   |
| Random Forests     | 0.891 ± 0.029            | 0.808 ± 0.052        | 0.940 ± 0.017        | 0.846 ± 0.041        | 33826.7 ± 23226.3            |                    |                      |                      |                      |                      |                   |               |                      |                      |                      |                      |                   |
| CART <sub>b</sub>  | <b>0.938 ± 0.019</b>     | <b>0.895 ± 0.020</b> | 0.964 ± 0.026        | <b>0.916 ± 0.021</b> | 1.0 ± 0.0                    |                    |                      |                      |                      |                      |                   |               |                      |                      |                      |                      |                   |
| CART <sub>cv</sub> | <b>0.938 ± 0.019</b>     | <b>0.895 ± 0.020</b> | 0.964 ± 0.026        | <b>0.916 ± 0.021</b> | 1.0 ± 0.0                    |                    |                      |                      |                      |                      |                   |               |                      |                      |                      |                      |                   |
| SCM <sub>b</sub>   | <b>0.938 ± 0.019</b>     | <b>0.895 ± 0.020</b> | 0.964 ± 0.026        | <b>0.916 ± 0.021</b> | 1.0 ± 0.0                    |                    |                      |                      |                      |                      |                   |               |                      |                      |                      |                      |                   |
| SCM <sub>cv</sub>  | <b>0.937 ± 0.018</b>     | <b>0.895 ± 0.020</b> | 0.962 ± 0.026        | <b>0.914 ± 0.020</b> | 1.4 ± 0.8                    |                    |                      |                      |                      |                      |                   |               |                      |                      |                      |                      |                   |
|                    | para-aminosalicylic acid | 378                  | 80                   | 298                  | 4.9                          |                    |                      |                      |                      |                      |                   | L1-logicistic | <b>0.883 ± 0.055</b> | 0.720 ± 0.108        | 0.925 ± 0.051        | <b>0.712 ± 0.127</b> | 2944.3 ± 3479.3   |

Continued on next page

**Table S1.** (Continued)

| Species | Antibiotic   | Genomes | Resistant | Susceptible | <i>k</i> -mers<br>(millions) | Method             | Accuracy             | Sensitivity          | Specificity          | F1 score             | Complexity        |
|---------|--------------|---------|-----------|-------------|------------------------------|--------------------|----------------------|----------------------|----------------------|----------------------|-------------------|
|         |              |         |           |             |                              | L2-logistic        | 0.843 ± 0.040        | <b>0.789 ± 0.113</b> | 0.856 ± 0.065        | 0.666 ± 0.070        | all*              |
|         |              |         |           |             |                              | Majority           | 0.797 ± 0.047        | 0.000 ± 0.000        | <b>1.000 ± 0.000</b> | –                    | –                 |
|         |              |         |           |             |                              | Naive Bayes        | 0.856 ± 0.031        | 0.562 ± 0.096        | 0.932 ± 0.031        | 0.607 ± 0.085        | all               |
|         |              |         |           |             |                              | Poly-SVM           | 0.845 ± 0.033        | 0.468 ± 0.109        | 0.942 ± 0.044        | 0.543 ± 0.083        | all               |
|         |              |         |           |             |                              | RBF-SVM            | 0.863 ± 0.033        | 0.562 ± 0.133        | 0.940 ± 0.029        | 0.614 ± 0.101        | all               |
|         |              |         |           |             |                              | Random Forests     | 0.852 ± 0.029        | 0.550 ± 0.126        | 0.932 ± 0.036        | 0.592 ± 0.077        | 4906.8 ± 8827.5   |
|         |              |         |           |             |                              | CART <sub>b</sub>  | 0.835 ± 0.029        | 0.362 ± 0.101        | 0.957 ± 0.033        | 0.459 ± 0.090        | 1.0 ± 0.0         |
|         |              |         |           |             |                              | CART <sub>cv</sub> | 0.823 ± 0.028        | 0.454 ± 0.116        | 0.918 ± 0.032        | 0.499 ± 0.063        | 10.3 ± 9.2        |
|         |              |         |           |             |                              | SCM <sub>b</sub>   | 0.836 ± 0.037        | 0.402 ± 0.127        | 0.948 ± 0.041        | 0.487 ± 0.110        | 1.1 ± 0.3         |
|         |              |         |           |             |                              | SCM <sub>cv</sub>  | 0.825 ± 0.035        | 0.418 ± 0.192        | 0.935 ± 0.063        | 0.469 ± 0.115        | 3.0 ± 2.7         |
|         | pyrazinamide | 3668    | 377       | 3291        | 10.6                         | L1-logistic        | <b>0.944 ± 0.009</b> | <b>0.696 ± 0.064</b> | 0.971 ± 0.007        | <b>0.707 ± 0.043</b> | 63589.6 ± 18666.8 |
|         |              |         |           |             |                              | L2-logistic        | <b>0.938 ± 0.008</b> | <b>0.695 ± 0.069</b> | 0.965 ± 0.005        | 0.685 ± 0.036        | all*              |
|         |              |         |           |             |                              | Majority           | 0.903 ± 0.009        | 0.000 ± 0.000        | <b>1.000 ± 0.000</b> | –                    | –                 |
|         |              |         |           |             |                              | Naive Bayes        | 0.842 ± 0.016        | 0.673 ± 0.070        | 0.860 ± 0.017        | 0.451 ± 0.039        | all               |
|         |              |         |           |             |                              | Poly-SVM           | <b>0.942 ± 0.008</b> | 0.665 ± 0.062        | 0.972 ± 0.005        | 0.689 ± 0.036        | all               |
|         |              |         |           |             |                              | RBF-SVM            | <b>0.941 ± 0.008</b> | 0.658 ± 0.057        | 0.971 ± 0.005        | 0.682 ± 0.033        | all               |
|         |              |         |           |             |                              | Random Forests     | <b>0.944 ± 0.009</b> | 0.633 ± 0.072        | 0.977 ± 0.007        | 0.685 ± 0.047        | 43384.9 ± 32114.6 |
|         |              |         |           |             |                              | CART <sub>b</sub>  | <b>0.942 ± 0.012</b> | 0.609 ± 0.067        | 0.978 ± 0.008        | 0.671 ± 0.054        | 11.3 ± 2.0        |
|         |              |         |           |             |                              | CART <sub>cv</sub> | <b>0.945 ± 0.009</b> | 0.584 ± 0.060        | 0.984 ± 0.009        | 0.671 ± 0.038        | 17.4 ± 9.4        |
|         |              |         |           |             |                              | SCM <sub>b</sub>   | <b>0.943 ± 0.008</b> | 0.571 ± 0.056        | 0.983 ± 0.006        | 0.657 ± 0.038        | 7.6 ± 1.6         |
|         |              |         |           |             |                              | SCM <sub>cv</sub>  | <b>0.941 ± 0.010</b> | 0.613 ± 0.046        | 0.977 ± 0.009        | 0.669 ± 0.038        | 13.4 ± 4.0        |
|         | rifabutin    | 161     | 72        | 89          | 4.7                          | L1-logistic        | <b>0.828 ± 0.045</b> | 0.795 ± 0.073        | 0.848 ± 0.094        | 0.814 ± 0.041        | 47.9 ± 11.6       |
|         |              |         |           |             |                              | L2-logistic        | 0.619 ± 0.062        | 0.621 ± 0.191        | 0.616 ± 0.123        | 0.593 ± 0.125        | all*              |
|         |              |         |           |             |                              | Majority           | 0.522 ± 0.078        | 0.000 ± 0.000        | <b>1.000 ± 0.000</b> | –                    | –                 |
|         |              |         |           |             |                              | Naive Bayes        | 0.575 ± 0.082        | 0.584 ± 0.148        | 0.574 ± 0.096        | 0.559 ± 0.111        | all               |
|         |              |         |           |             |                              | Poly-SVM           | 0.641 ± 0.068        | 0.589 ± 0.114        | 0.690 ± 0.064        | 0.605 ± 0.082        | all               |
|         |              |         |           |             |                              | RBF-SVM            | 0.631 ± 0.073        | 0.572 ± 0.103        | 0.684 ± 0.089        | 0.593 ± 0.087        | all               |
|         |              |         |           |             |                              | Random Forests     | 0.678 ± 0.096        | 0.555 ± 0.139        | 0.793 ± 0.132        | 0.616 ± 0.114        | 7461.1 ± 7864.9   |
|         |              |         |           |             |                              | CART <sub>b</sub>  | <b>0.834 ± 0.047</b> | <b>0.819 ± 0.071</b> | 0.835 ± 0.085        | <b>0.824 ± 0.047</b> | 1.0 ± 0.0         |
|         |              |         |           |             |                              | CART <sub>cv</sub> | <b>0.828 ± 0.054</b> | <b>0.813 ± 0.067</b> | 0.829 ± 0.088        | <b>0.818 ± 0.052</b> | 1.7 ± 1.6         |
|         |              |         |           |             |                              | SCM <sub>b</sub>   | <b>0.834 ± 0.047</b> | <b>0.819 ± 0.071</b> | 0.835 ± 0.085        | <b>0.824 ± 0.047</b> | 1.0 ± 0.0         |
|         |              |         |           |             |                              | SCM <sub>cv</sub>  | <b>0.825 ± 0.040</b> | <b>0.811 ± 0.054</b> | 0.822 ± 0.095        | <b>0.815 ± 0.035</b> | 1.5 ± 0.7         |
|         | rifampin     | 5022    | 1396      | 3626        | 11.7                         | L1-logistic        | <b>0.974 ± 0.005</b> | <b>0.962 ± 0.013</b> | 0.979 ± 0.005        | <b>0.954 ± 0.009</b> | 1376.3 ± 164.7    |
|         |              |         |           |             |                              | L2-logistic        | 0.958 ± 0.008        | 0.902 ± 0.014        | 0.979 ± 0.007        | 0.922 ± 0.014        | all*              |
|         |              |         |           |             |                              | Majority           | 0.724 ± 0.011        | 0.000 ± 0.000        | <b>1.000 ± 0.000</b> | –                    | –                 |
|         |              |         |           |             |                              | Naive Bayes        | 0.828 ± 0.011        | 0.821 ± 0.026        | 0.831 ± 0.011        | 0.725 ± 0.021        | all               |
|         |              |         |           |             |                              | Poly-SVM           | 0.950 ± 0.007        | 0.883 ± 0.014        | 0.976 ± 0.006        | 0.907 ± 0.013        | all               |
|         |              |         |           |             |                              | RBF-SVM            | 0.948 ± 0.009        | 0.885 ± 0.015        | 0.972 ± 0.007        | 0.904 ± 0.015        | all               |
|         |              |         |           |             |                              | Random Forests     | 0.965 ± 0.005        | 0.932 ± 0.011        | 0.978 ± 0.006        | 0.937 ± 0.008        | 77974.3 ± 44091.8 |
|         |              |         |           |             |                              | CART <sub>b</sub>  | <b>0.977 ± 0.005</b> | <b>0.963 ± 0.014</b> | 0.982 ± 0.005        | <b>0.958 ± 0.009</b> | 4.0 ± 0.9         |
|         |              |         |           |             |                              | CART <sub>cv</sub> | <b>0.978 ± 0.005</b> | <b>0.966 ± 0.014</b> | 0.982 ± 0.006        | <b>0.960 ± 0.008</b> | 4.6 ± 1.1         |
|         |              |         |           |             |                              | SCM <sub>b</sub>   | <b>0.977 ± 0.005</b> | <b>0.963 ± 0.014</b> | 0.982 ± 0.005        | <b>0.958 ± 0.009</b> | 3.4 ± 0.5         |
|         |              |         |           |             |                              | SCM <sub>cv</sub>  | <b>0.977 ± 0.005</b> | <b>0.966 ± 0.013</b> | 0.982 ± 0.006        | <b>0.960 ± 0.008</b> | 4.2 ± 1.0         |
|         | streptomycin | 3406    | 1084      | 2322        | 9.9                          | L1-logistic        | <b>0.907 ± 0.004</b> | <b>0.865 ± 0.015</b> | 0.926 ± 0.007        | <b>0.854 ± 0.007</b> | 1926.9 ± 130.3    |
|         |              |         |           |             |                              | L2-logistic        | 0.895 ± 0.008        | 0.817 ± 0.017        | 0.931 ± 0.009        | 0.830 ± 0.015        | all*              |

Continued on next page

Table S1. (Continued)

| Species               | Antibiotic           | Genomes              | Resistant            | Susceptible          | k-mers (millions)    | Method             | Accuracy             | Sensitivity          | Specificity          | F1 score             | Complexity        |                      |                      |                      |                   |
|-----------------------|----------------------|----------------------|----------------------|----------------------|----------------------|--------------------|----------------------|----------------------|----------------------|----------------------|-------------------|----------------------|----------------------|----------------------|-------------------|
| <i>N. gonorrhoeae</i> | azithromycin         | 392                  | 214                  | 178                  | 4.8                  | Majority           | 0.687 ± 0.009        | 0.000 ± 0.000        | <b>1.000 ± 0.000</b> | –                    | –                 |                      |                      |                      |                   |
|                       |                      |                      |                      |                      |                      | Naive Bayes        | 0.761 ± 0.020        | 0.713 ± 0.030        | 0.783 ± 0.025        | 0.652 ± 0.026        | all               |                      |                      |                      |                   |
|                       |                      |                      |                      |                      |                      | Poly-SVM           | 0.896 ± 0.008        | 0.797 ± 0.025        | 0.941 ± 0.010        | 0.827 ± 0.016        | all               |                      |                      |                      |                   |
|                       |                      |                      |                      |                      |                      | RBF-SVM            | 0.892 ± 0.009        | 0.780 ± 0.025        | 0.943 ± 0.012        | 0.818 ± 0.018        | all               |                      |                      |                      |                   |
|                       |                      |                      |                      |                      |                      | Random Forests     | <b>0.906 ± 0.008</b> | 0.805 ± 0.024        | 0.952 ± 0.007        | 0.843 ± 0.016        | 68247.2 ± 46223.9 |                      |                      |                      |                   |
|                       |                      |                      |                      |                      |                      | CART <sub>b</sub>  | <b>0.910 ± 0.006</b> | 0.805 ± 0.027        | 0.958 ± 0.011        | <b>0.848 ± 0.011</b> | 10.0 ± 1.4        |                      |                      |                      |                   |
|                       |                      |                      |                      |                      |                      | CART <sub>cv</sub> | <b>0.907 ± 0.006</b> | 0.807 ± 0.032        | 0.953 ± 0.014        | <b>0.845 ± 0.012</b> | 17.5 ± 11.8       |                      |                      |                      |                   |
|                       |                      |                      |                      |                      |                      | SCM <sub>b</sub>   | <b>0.906 ± 0.010</b> | 0.783 ± 0.037        | 0.961 ± 0.012        | 0.838 ± 0.019        | 6.8 ± 0.9         |                      |                      |                      |                   |
|                       |                      |                      |                      |                      |                      | SCM <sub>cv</sub>  | <b>0.908 ± 0.011</b> | 0.777 ± 0.029        | 0.968 ± 0.009        | 0.841 ± 0.021        | 11.2 ± 3.5        |                      |                      |                      |                   |
|                       |                      |                      |                      |                      |                      | L1-logistic        | <b>0.942 ± 0.024</b> | 0.939 ± 0.036        | <b>0.945 ± 0.039</b> | <b>0.945 ± 0.025</b> | 6095.6 ± 9342.0   |                      |                      |                      |                   |
|                       |                      |                      |                      |                      |                      | L2-logistic        | 0.915 ± 0.031        | 0.903 ± 0.048        | 0.928 ± 0.032        | 0.918 ± 0.030        | all*              |                      |                      |                      |                   |
|                       |                      |                      |                      |                      |                      | Majority           | 0.529 ± 0.035        | <b>1.000 ± 0.000</b> | 0.000 ± 0.000        | 0.692 ± 0.030        | –                 |                      |                      |                      |                   |
|                       |                      |                      |                      |                      |                      | Naive Bayes        | 0.736 ± 0.055        | 0.596 ± 0.086        | 0.894 ± 0.045        | 0.702 ± 0.072        | all               |                      |                      |                      |                   |
|                       |                      |                      |                      |                      |                      | Poly-SVM           | 0.906 ± 0.038        | 0.902 ± 0.057        | 0.910 ± 0.046        | 0.909 ± 0.038        | all               |                      |                      |                      |                   |
|                       |                      |                      |                      |                      |                      | RBF-SVM            | 0.905 ± 0.035        | 0.902 ± 0.053        | 0.907 ± 0.040        | 0.908 ± 0.035        | all               |                      |                      |                      |                   |
|                       |                      |                      |                      |                      |                      | Random Forests     | 0.895 ± 0.040        | 0.893 ± 0.049        | 0.897 ± 0.045        | 0.899 ± 0.039        | 4571.7 ± 7185.8   |                      |                      |                      |                   |
|                       | CART <sub>b</sub>    | <b>0.936 ± 0.039</b> | 0.969 ± 0.028        | 0.899 ± 0.057        | <b>0.942 ± 0.035</b> | 3.3 ± 0.5          |                      |                      |                      |                      |                   |                      |                      |                      |                   |
|                       | CART <sub>cv</sub>   | 0.929 ± 0.031        | 0.962 ± 0.030        | 0.894 ± 0.047        | <b>0.935 ± 0.028</b> | 6.1 ± 3.8          |                      |                      |                      |                      |                   |                      |                      |                      |                   |
|                       | SCM <sub>b</sub>     | <b>0.935 ± 0.030</b> | 0.974 ± 0.023        | 0.891 ± 0.047        | <b>0.941 ± 0.026</b> | 3.0 ± 0.0          |                      |                      |                      |                      |                   |                      |                      |                      |                   |
|                       | SCM <sub>cv</sub>    | <b>0.935 ± 0.033</b> | 0.972 ± 0.024        | 0.894 ± 0.048        | <b>0.940 ± 0.029</b> | 3.5 ± 0.8          |                      |                      |                      |                      |                   |                      |                      |                      |                   |
|                       | ciprofloxacin        | 173                  | 106                  | 67                   | 3.0                  | L1-logistic        | <b>0.971 ± 0.024</b> | 0.974 ± 0.037        | 0.967 ± 0.060        | <b>0.977 ± 0.018</b> | 9440.5 ± 24435.6  |                      |                      |                      |                   |
|                       |                      |                      |                      |                      |                      | L2-logistic        | <b>0.968 ± 0.017</b> | 0.950 ± 0.024        | <b>1.000 ± 0.000</b> | <b>0.974 ± 0.013</b> | all*              |                      |                      |                      |                   |
|                       |                      |                      |                      |                      |                      | Majority           | 0.638 ± 0.048        | <b>1.000 ± 0.000</b> | 0.000 ± 0.000        | 0.778 ± 0.036        | –                 |                      |                      |                      |                   |
|                       |                      |                      |                      |                      |                      | Naive Bayes        | 0.935 ± 0.053        | 0.899 ± 0.086        | <b>1.000 ± 0.000</b> | 0.945 ± 0.049        | all               |                      |                      |                      |                   |
|                       |                      |                      |                      |                      |                      | Poly-SVM           | <b>0.971 ± 0.020</b> | 0.955 ± 0.029        | <b>1.000 ± 0.000</b> | <b>0.977 ± 0.015</b> | all               |                      |                      |                      |                   |
|                       |                      |                      |                      |                      |                      | RBF-SVM            | <b>0.971 ± 0.014</b> | 0.954 ± 0.021        | <b>1.000 ± 0.000</b> | <b>0.977 ± 0.011</b> | all               |                      |                      |                      |                   |
|                       |                      |                      |                      |                      |                      | Random Forests     | <b>0.968 ± 0.035</b> | 0.965 ± 0.050        | 0.976 ± 0.039        | <b>0.975 ± 0.027</b> | 1026.2 ± 1402.6   |                      |                      |                      |                   |
|                       |                      |                      |                      |                      |                      | CART <sub>b</sub>  | <b>0.971 ± 0.031</b> | <b>0.991 ± 0.029</b> | 0.935 ± 0.065        | <b>0.977 ± 0.024</b> | 1.0 ± 0.0         |                      |                      |                      |                   |
|                       |                      |                      |                      |                      |                      | CART <sub>cv</sub> | 0.956 ± 0.040        | 0.977 ± 0.038        | 0.917 ± 0.070        | 0.966 ± 0.030        | 1.1 ± 0.3         |                      |                      |                      |                   |
|                       |                      |                      |                      |                      |                      | SCM <sub>b</sub>   | <b>0.971 ± 0.031</b> | <b>0.991 ± 0.029</b> | 0.935 ± 0.065        | <b>0.977 ± 0.024</b> | 1.0 ± 0.0         |                      |                      |                      |                   |
|                       |                      |                      |                      |                      |                      | SCM <sub>cv</sub>  | <b>0.965 ± 0.030</b> | 0.982 ± 0.032        | 0.935 ± 0.065        | <b>0.973 ± 0.024</b> | 1.1 ± 0.3         |                      |                      |                      |                   |
|                       |                      |                      |                      |                      |                      | erythromycin       | 178                  | 97                   | 81                   | 3.0                  | L1-logistic       | 0.869 ± 0.041        | 0.887 ± 0.064        | <b>0.838 ± 0.082</b> | 0.882 ± 0.041     |
| L2-logistic           |                      |                      |                      |                      |                      |                    |                      |                      |                      |                      | 0.849 ± 0.036     | 0.866 ± 0.071        | 0.818 ± 0.074        | 0.864 ± 0.039        | all*              |
| Majority              |                      |                      |                      |                      |                      |                    |                      |                      |                      |                      | 0.566 ± 0.061     | <b>1.000 ± 0.000</b> | 0.000 ± 0.000        | 0.721 ± 0.051        | –                 |
| Naive Bayes           |                      |                      |                      |                      |                      |                    |                      |                      |                      |                      | 0.843 ± 0.078     | 0.831 ± 0.116        | <b>0.846 ± 0.076</b> | 0.850 ± 0.086        | all               |
| Poly-SVM              |                      |                      |                      |                      |                      |                    |                      |                      |                      |                      | 0.869 ± 0.047     | 0.902 ± 0.064        | 0.818 ± 0.097        | 0.885 ± 0.041        | all               |
| RBF-SVM               | 0.866 ± 0.049        | 0.902 ± 0.064        | 0.811 ± 0.090        | 0.882 ± 0.044        | all                  |                    |                      |                      |                      |                      |                   |                      |                      |                      |                   |
| Random Forests        | 0.871 ± 0.036        | 0.909 ± 0.038        | 0.818 ± 0.066        | 0.889 ± 0.029        | 413.5 ± 822.4        |                    |                      |                      |                      |                      |                   |                      |                      |                      |                   |
| CART <sub>b</sub>     | <b>0.883 ± 0.041</b> | 0.919 ± 0.047        | 0.831 ± 0.075        | <b>0.898 ± 0.034</b> | 1.0 ± 0.0            |                    |                      |                      |                      |                      |                   |                      |                      |                      |                   |
| CART <sub>cv</sub>    | <b>0.886 ± 0.038</b> | 0.925 ± 0.047        | 0.831 ± 0.075        | <b>0.901 ± 0.030</b> | 1.0 ± 0.0            |                    |                      |                      |                      |                      |                   |                      |                      |                      |                   |
| SCM <sub>b</sub>      | <b>0.889 ± 0.044</b> | 0.925 ± 0.047        | <b>0.838 ± 0.082</b> | <b>0.904 ± 0.035</b> | 1.0 ± 0.0            |                    |                      |                      |                      |                      |                   |                      |                      |                      |                   |
| SCM <sub>cv</sub>     | 0.874 ± 0.049        | 0.908 ± 0.055        | 0.825 ± 0.079        | 0.889 ± 0.045        | 1.2 ± 0.6            |                    |                      |                      |                      |                      |                   |                      |                      |                      |                   |
| tetracycline          | 142                  | 109                  | 33                   | 2.9                  | L1-logistic          |                    |                      |                      |                      |                      | 0.929 ± 0.038     | 0.972 ± 0.048        | 0.758 ± 0.180        | 0.954 ± 0.026        | 40683.8 ± 76894.8 |
|                       |                      |                      |                      |                      | L2-logistic          |                    |                      |                      |                      |                      | 0.904 ± 0.058     | 0.929 ± 0.065        | <b>0.801 ± 0.170</b> | 0.938 ± 0.036        | all*              |
|                       |                      |                      |                      |                      | Majority             |                    |                      |                      |                      |                      | 0.775 ± 0.073     | <b>1.000 ± 0.000</b> | 0.000 ± 0.000        | 0.872 ± 0.047        | –                 |

Continued on next page

**Table S1.** (Continued)

| Species              | Antibiotic         | Genomes              | Resistant            | Susceptible          | <i>k</i> -mers<br>(millions) | Method             | Accuracy             | Sensitivity          | Specificity          | F1 score             | Complexity        |                      |               |                      |                      |               |
|----------------------|--------------------|----------------------|----------------------|----------------------|------------------------------|--------------------|----------------------|----------------------|----------------------|----------------------|-------------------|----------------------|---------------|----------------------|----------------------|---------------|
| <i>P. aeruginosa</i> | amikacin           | 498                  | 90                   | 408                  | 43.2                         | Naive Bayes        | 0.896 ± 0.064        | 0.920 ± 0.058        | <b>0.801 ± 0.170</b> | 0.933 ± 0.039        | all               |                      |               |                      |                      |               |
|                      |                    |                      |                      |                      |                              | Poly-SVM           | <b>0.950 ± 0.038</b> | <b>0.996 ± 0.013</b> | 0.770 ± 0.177        | <b>0.969 ± 0.023</b> | all               |                      |               |                      |                      |               |
|                      |                    |                      |                      |                      |                              | RBF-SVM            | <b>0.950 ± 0.038</b> | <b>0.996 ± 0.013</b> | 0.770 ± 0.177        | <b>0.969 ± 0.023</b> | all               |                      |               |                      |                      |               |
|                      |                    |                      |                      |                      |                              | Random Forests     | 0.936 ± 0.060        | 0.969 ± 0.053        | <b>0.801 ± 0.170</b> | 0.959 ± 0.036        | 1010.6 ± 1560.9   |                      |               |                      |                      |               |
|                      |                    |                      |                      |                      |                              | CART <sub>b</sub>  | 0.918 ± 0.053        | 0.966 ± 0.044        | 0.747 ± 0.190        | 0.949 ± 0.033        | 1.0 ± 0.0         |                      |               |                      |                      |               |
|                      |                    |                      |                      |                      |                              | CART <sub>cv</sub> | 0.896 ± 0.043        | 0.940 ± 0.074        | 0.736 ± 0.184        | 0.932 ± 0.034        | 1.5 ± 0.8         |                      |               |                      |                      |               |
|                      |                    |                      |                      |                      |                              | SCM <sub>b</sub>   | 0.896 ± 0.059        | 0.942 ± 0.072        | 0.735 ± 0.175        | 0.933 ± 0.040        | 1.0 ± 0.0         |                      |               |                      |                      |               |
|                      |                    |                      |                      |                      |                              | SCM <sub>cv</sub>  | 0.907 ± 0.042        | 0.950 ± 0.062        | 0.747 ± 0.190        | 0.940 ± 0.029        | 1.3 ± 0.5         |                      |               |                      |                      |               |
|                      |                    |                      |                      |                      |                              | L1-logistic        | 0.879 ± 0.029        | 0.576 ± 0.095        | 0.942 ± 0.024        | 0.620 ± 0.097        | 33987.3 ± 66238.1 |                      |               |                      |                      |               |
|                      |                    |                      |                      |                      |                              | L2-logistic        | 0.845 ± 0.030        | 0.553 ± 0.127        | 0.908 ± 0.026        | 0.550 ± 0.092        | all*              |                      |               |                      |                      |               |
|                      |                    |                      |                      |                      |                              | Majority           | 0.824 ± 0.031        | 0.000 ± 0.000        | <b>1.000 ± 0.000</b> | –                    | –                 |                      |               |                      |                      |               |
|                      |                    |                      |                      |                      |                              | Naive Bayes        | 0.802 ± 0.030        | <b>0.630 ± 0.090</b> | 0.838 ± 0.027        | 0.523 ± 0.088        | all               |                      |               |                      |                      |               |
|                      |                    |                      |                      |                      |                              | Poly-SVM           | 0.848 ± 0.031        | 0.417 ± 0.136        | 0.941 ± 0.024        | 0.479 ± 0.122        | all               |                      |               |                      |                      |               |
|                      |                    |                      |                      |                      |                              | RBF-SVM            | 0.864 ± 0.028        | 0.414 ± 0.101        | 0.960 ± 0.024        | 0.509 ± 0.108        | all               |                      |               |                      |                      |               |
|                      |                    |                      |                      |                      |                              | Random Forests     | 0.874 ± 0.023        | 0.536 ± 0.092        | 0.947 ± 0.009        | 0.594 ± 0.069        | 12334.6 ± 9968.8  |                      |               |                      |                      |               |
|                      |                    |                      |                      |                      |                              | CART <sub>b</sub>  | 0.860 ± 0.041        | 0.422 ± 0.172        | 0.953 ± 0.027        | 0.499 ± 0.150        | 2.7 ± 0.9         |                      |               |                      |                      |               |
|                      |                    |                      |                      |                      |                              | CART <sub>cv</sub> | 0.861 ± 0.037        | 0.482 ± 0.150        | 0.944 ± 0.034        | 0.539 ± 0.116        | 6.8 ± 2.8         |                      |               |                      |                      |               |
|                      |                    |                      |                      |                      |                              | SCM <sub>b</sub>   | <b>0.891 ± 0.022</b> | 0.604 ± 0.134        | 0.953 ± 0.021        | 0.650 ± 0.098        | 3.6 ± 0.5         |                      |               |                      |                      |               |
|                      |                    |                      |                      |                      |                              | SCM <sub>cv</sub>  | <b>0.888 ± 0.026</b> | <b>0.638 ± 0.098</b> | 0.940 ± 0.023        | <b>0.661 ± 0.101</b> | 4.6 ± 1.3         |                      |               |                      |                      |               |
|                      |                    |                      |                      |                      |                              | ciprofloxacin      | 132                  | 29                   | 103                  | 22.5                 | L1-logistic       | <b>0.969 ± 0.030</b> | 0.883 ± 0.150 | <b>0.994 ± 0.018</b> | <b>0.926 ± 0.089</b> | 381.5 ± 452.3 |
|                      |                    |                      |                      |                      |                              |                    |                      |                      |                      |                      | L2-logistic       | 0.808 ± 0.091        | 0.412 ± 0.134 | 0.944 ± 0.048        | 0.519 ± 0.141        | all*          |
|                      | Majority           | 0.742 ± 0.115        | 0.000 ± 0.000        | <b>1.000 ± 0.000</b> | –                            |                    |                      |                      |                      |                      | –                 |                      |               |                      |                      |               |
|                      | Naive Bayes        | 0.708 ± 0.100        | 0.385 ± 0.178        | 0.810 ± 0.092        | –                            |                    |                      |                      |                      |                      | all               |                      |               |                      |                      |               |
|                      | Poly-SVM           | 0.788 ± 0.125        | 0.287 ± 0.237        | 0.985 ± 0.033        | –                            |                    |                      |                      |                      |                      | all               |                      |               |                      |                      |               |
|                      | RBF-SVM            | 0.792 ± 0.125        | 0.304 ± 0.246        | 0.985 ± 0.033        | –                            |                    |                      |                      |                      |                      | all               |                      |               |                      |                      |               |
|                      | Random Forests     | 0.823 ± 0.095        | 0.396 ± 0.166        | 0.978 ± 0.029        | 0.527 ± 0.151                |                    |                      |                      |                      |                      | 1515.5 ± 2132.5   |                      |               |                      |                      |               |
|                      | CART <sub>b</sub>  | <b>0.965 ± 0.038</b> | <b>0.917 ± 0.133</b> | 0.982 ± 0.029        | <b>0.934 ± 0.086</b>         |                    |                      |                      |                      |                      | 1.0 ± 0.0         |                      |               |                      |                      |               |
|                      | CART <sub>cv</sub> | <b>0.962 ± 0.036</b> | 0.883 ± 0.150        | 0.982 ± 0.029        | 0.914 ± 0.092                |                    |                      |                      |                      |                      | 1.0 ± 0.0         |                      |               |                      |                      |               |
|                      | SCM <sub>b</sub>   | 0.958 ± 0.034        | 0.867 ± 0.145        | 0.982 ± 0.029        | 0.905 ± 0.087                |                    |                      |                      |                      |                      | 1.0 ± 0.0         |                      |               |                      |                      |               |
|                      | SCM <sub>cv</sub>  | 0.958 ± 0.034        | 0.867 ± 0.145        | 0.982 ± 0.029        | 0.905 ± 0.087                |                    |                      |                      |                      |                      | 1.0 ± 0.0         |                      |               |                      |                      |               |
|                      | L1-logistic        | <b>0.937 ± 0.024</b> | 0.893 ± 0.046        | 0.967 ± 0.033        | 0.921 ± 0.029                |                    |                      |                      |                      |                      | 87.8 ± 9.6        |                      |               |                      |                      |               |
|                      | L2-logistic        | 0.828 ± 0.043        | 0.789 ± 0.077        | 0.855 ± 0.048        | 0.789 ± 0.060                |                    |                      |                      |                      |                      | all*              |                      |               |                      |                      |               |
|                      | Majority           | 0.588 ± 0.027        | 0.000 ± 0.000        | <b>1.000 ± 0.000</b> | –                            |                    |                      |                      |                      |                      | –                 |                      |               |                      |                      |               |
|                      | Naive Bayes        | 0.768 ± 0.051        | 0.666 ± 0.108        | 0.842 ± 0.046        | 0.700 ± 0.078                |                    |                      |                      |                      |                      | all               |                      |               |                      |                      |               |
|                      | Poly-SVM           | 0.773 ± 0.050        | 0.669 ± 0.073        | 0.848 ± 0.058        | 0.708 ± 0.066                |                    |                      |                      |                      |                      | all               |                      |               |                      |                      |               |
|                      | RBF-SVM            | 0.762 ± 0.041        | 0.643 ± 0.103        | 0.846 ± 0.055        | 0.687 ± 0.072                |                    |                      |                      |                      |                      | all               |                      |               |                      |                      |               |
|                      | Random Forests     | 0.874 ± 0.035        | 0.812 ± 0.083        | 0.918 ± 0.040        | 0.840 ± 0.051                |                    |                      |                      |                      |                      | 21600.5 ± 14329.4 |                      |               |                      |                      |               |
|                      | CART <sub>b</sub>  | <b>0.942 ± 0.028</b> | 0.926 ± 0.037        | 0.952 ± 0.038        | <b>0.931 ± 0.031</b>         |                    |                      |                      |                      |                      | 1.1 ± 0.3         |                      |               |                      |                      |               |
|                      | CART <sub>cv</sub> | <b>0.941 ± 0.021</b> | <b>0.963 ± 0.026</b> | 0.924 ± 0.037        | <b>0.932 ± 0.020</b>         |                    |                      |                      |                      |                      | 2.5 ± 1.1         |                      |               |                      |                      |               |
|                      | SCM <sub>b</sub>   | <b>0.939 ± 0.023</b> | 0.929 ± 0.041        | 0.945 ± 0.034        | <b>0.927 ± 0.025</b>         |                    |                      |                      |                      |                      | 1.2 ± 0.4         |                      |               |                      |                      |               |
|                      | SCM <sub>cv</sub>  | <b>0.939 ± 0.028</b> | 0.917 ± 0.048        | 0.954 ± 0.039        | <b>0.926 ± 0.033</b>         | 1.4 ± 0.5          |                      |                      |                      |                      |                   |                      |               |                      |                      |               |
|                      | meropenem          | 380                  | 163                  | 217                  | 39.0                         | L1-logistic        | <b>0.720 ± 0.047</b> | 0.625 ± 0.107        | 0.785 ± 0.043        | 0.646 ± 0.085        | 3827.0 ± 7601.6   |                      |               |                      |                      |               |
| L2-logistic          |                    |                      |                      |                      |                              | 0.688 ± 0.035      | 0.586 ± 0.079        | 0.761 ± 0.046        | 0.608 ± 0.060        | all*                 |                   |                      |               |                      |                      |               |
| Majority             |                    |                      |                      |                      |                              | 0.583 ± 0.035      | 0.000 ± 0.000        | <b>1.000 ± 0.000</b> | –                    | –                    |                   |                      |               |                      |                      |               |
| Naive Bayes          |                    |                      |                      |                      |                              | 0.663 ± 0.036      | 0.546 ± 0.057        | 0.746 ± 0.057        | 0.573 ± 0.059        | all                  |                   |                      |               |                      |                      |               |

Continued on next page



**Table S1.** (Continued)

| Species             | Antibiotic         | Genomes              | Resistant            | Susceptible   | <i>k</i> -mers<br>(millions) | Method             | Accuracy             | Sensitivity          | Specificity          | F1 score             | Complexity          |                      |                      |                      |                      |                     |
|---------------------|--------------------|----------------------|----------------------|---------------|------------------------------|--------------------|----------------------|----------------------|----------------------|----------------------|---------------------|----------------------|----------------------|----------------------|----------------------|---------------------|
| <i>P. difficile</i> | azithromycin       | 461                  | 213                  | 248           | 19.8                         | Poly-SVM           | 0.688 ± 0.047        | 0.536 ± 0.105        | 0.798 ± 0.075        | 0.585 ± 0.080        | all                 |                      |                      |                      |                      |                     |
|                     |                    |                      |                      |               |                              | RBF-SVM            | 0.679 ± 0.038        | 0.535 ± 0.081        | 0.781 ± 0.080        | 0.579 ± 0.058        | all                 |                      |                      |                      |                      |                     |
|                     |                    |                      |                      |               |                              | Random Forests     | <b>0.724 ± 0.035</b> | 0.608 ± 0.059        | 0.805 ± 0.059        | 0.646 ± 0.046        | 8561.0 ± 9899.8     |                      |                      |                      |                      |                     |
|                     |                    |                      |                      |               |                              | CART <sub>b</sub>  | <b>0.724 ± 0.040</b> | <b>0.650 ± 0.099</b> | 0.778 ± 0.069        | <b>0.659 ± 0.055</b> | 1.1 ± 0.3           |                      |                      |                      |                      |                     |
|                     |                    |                      |                      |               |                              | CART <sub>cv</sub> | 0.711 ± 0.038        | <b>0.647 ± 0.106</b> | 0.757 ± 0.072        | 0.647 ± 0.067        | 2.6 ± 3.9           |                      |                      |                      |                      |                     |
|                     |                    |                      |                      |               |                              | SCM <sub>b</sub>   | <b>0.722 ± 0.038</b> | <b>0.650 ± 0.099</b> | 0.776 ± 0.067        | <b>0.658 ± 0.055</b> | 1.2 ± 0.4           |                      |                      |                      |                      |                     |
|                     |                    |                      |                      |               |                              | SCM <sub>cv</sub>  | 0.700 ± 0.038        | 0.619 ± 0.131        | 0.762 ± 0.079        | 0.626 ± 0.073        | 4.1 ± 6.0           |                      |                      |                      |                      |                     |
|                     |                    |                      |                      |               |                              | L1-logistic        | 0.947 ± 0.020        | 0.934 ± 0.037        | 0.958 ± 0.026        | 0.941 ± 0.023        | 52144.5 ± 97222.7   |                      |                      |                      |                      |                     |
|                     |                    |                      |                      |               |                              | L2-logistic        | 0.940 ± 0.024        | 0.936 ± 0.034        | 0.944 ± 0.031        | 0.934 ± 0.028        | all*                |                      |                      |                      |                      |                     |
|                     |                    |                      |                      |               |                              | Majority           | 0.543 ± 0.027        | 0.000 ± 0.000        | <b>1.000 ± 0.000</b> | –                    | –                   |                      |                      |                      |                      |                     |
|                     |                    |                      |                      |               |                              | Naive Bayes        | 0.864 ± 0.036        | 0.768 ± 0.051        | 0.946 ± 0.031        | 0.838 ± 0.041        | all                 |                      |                      |                      |                      |                     |
|                     |                    |                      |                      |               |                              | Poly-SVM           | 0.951 ± 0.023        | 0.943 ± 0.038        | 0.959 ± 0.026        | 0.946 ± 0.028        | all                 |                      |                      |                      |                      |                     |
|                     |                    |                      |                      |               |                              | RBF-SVM            | 0.947 ± 0.025        | 0.938 ± 0.038        | 0.955 ± 0.031        | 0.941 ± 0.030        | all                 |                      |                      |                      |                      |                     |
|                     |                    |                      |                      |               |                              | Random Forests     | 0.942 ± 0.016        | 0.929 ± 0.035        | 0.955 ± 0.027        | 0.936 ± 0.020        | 794.1 ± 802.7       |                      |                      |                      |                      |                     |
|                     |                    |                      |                      |               |                              | CART <sub>b</sub>  | <b>0.985 ± 0.009</b> | <b>0.981 ± 0.010</b> | 0.988 ± 0.014        | <b>0.983 ± 0.011</b> | 3.0 ± 0.0           |                      |                      |                      |                      |                     |
|                     |                    |                      |                      |               |                              | CART <sub>cv</sub> | <b>0.976 ± 0.017</b> | 0.965 ± 0.029        | 0.986 ± 0.013        | <b>0.974 ± 0.019</b> | 3.9 ± 1.4           |                      |                      |                      |                      |                     |
|                     |                    |                      |                      |               |                              | SCM <sub>b</sub>   | <b>0.978 ± 0.014</b> | 0.967 ± 0.032        | 0.988 ± 0.014        | <b>0.976 ± 0.016</b> | 3.0 ± 0.7           |                      |                      |                      |                      |                     |
|                     |                    |                      |                      |               |                              | SCM <sub>cv</sub>  | <b>0.984 ± 0.011</b> | <b>0.979 ± 0.013</b> | 0.988 ± 0.014        | <b>0.982 ± 0.012</b> | 3.3 ± 0.5           |                      |                      |                      |                      |                     |
|                     | ceftriaxone        | 212                  | 150                  | 62            | 11.1                         | L1-logistic        | 0.902 ± 0.038        | 0.936 ± 0.046        | 0.809 ± 0.161        | <b>0.934 ± 0.026</b> | 101937.2 ± 234203.7 |                      |                      |                      |                      |                     |
|                     |                    |                      |                      |               |                              | L2-logistic        | 0.907 ± 0.029        | 0.933 ± 0.041        | 0.844 ± 0.145        | <b>0.936 ± 0.020</b> | all*                |                      |                      |                      |                      |                     |
|                     |                    |                      |                      |               |                              | Majority           | 0.743 ± 0.055        | <b>1.000 ± 0.000</b> | 0.000 ± 0.000        | 0.851 ± 0.036        | –                   |                      |                      |                      |                      |                     |
|                     |                    |                      |                      |               |                              | Naive Bayes        | 0.824 ± 0.036        | 0.792 ± 0.046        | <b>0.921 ± 0.062</b> | 0.869 ± 0.031        | all                 |                      |                      |                      |                      |                     |
|                     |                    |                      |                      |               |                              | Poly-SVM           | 0.895 ± 0.026        | 0.930 ± 0.045        | 0.798 ± 0.137        | 0.929 ± 0.019        | all                 |                      |                      |                      |                      |                     |
|                     |                    |                      |                      |               |                              | RBF-SVM            | 0.905 ± 0.034        | 0.942 ± 0.045        | 0.798 ± 0.137        | <b>0.936 ± 0.024</b> | all                 |                      |                      |                      |                      |                     |
|                     |                    |                      |                      |               |                              | Random Forests     | <b>0.917 ± 0.034</b> | 0.939 ± 0.042        | 0.858 ± 0.155        | <b>0.943 ± 0.023</b> | 436.1 ± 474.3       |                      |                      |                      |                      |                     |
|                     |                    |                      |                      |               |                              | CART <sub>b</sub>  | 0.886 ± 0.029        | 0.914 ± 0.057        | 0.822 ± 0.177        | 0.921 ± 0.023        | 1.3 ± 0.5           |                      |                      |                      |                      |                     |
|                     |                    |                      |                      |               |                              | CART <sub>cv</sub> | 0.890 ± 0.044        | 0.923 ± 0.060        | 0.810 ± 0.177        | 0.925 ± 0.032        | 2.0 ± 1.2           |                      |                      |                      |                      |                     |
|                     |                    |                      |                      |               |                              | SCM <sub>b</sub>   | 0.893 ± 0.036        | 0.929 ± 0.063        | 0.793 ± 0.164        | 0.927 ± 0.028        | 1.2 ± 0.4           |                      |                      |                      |                      |                     |
|                     |                    |                      |                      |               |                              | SCM <sub>cv</sub>  | 0.890 ± 0.038        | 0.921 ± 0.056        | 0.820 ± 0.175        | 0.925 ± 0.028        | 1.7 ± 0.8           |                      |                      |                      |                      |                     |
|                     |                    |                      |                      |               |                              | clarithromycin     | 461                  | 213                  | 248                  | 19.8                 | L1-logistic         | 0.941 ± 0.019        | 0.936 ± 0.044        | 0.946 ± 0.032        | 0.935 ± 0.022        | 153841.5 ± 267155.4 |
|                     |                    |                      |                      |               |                              |                    |                      |                      |                      |                      | L2-logistic         | 0.936 ± 0.018        | 0.924 ± 0.050        | 0.946 ± 0.036        | 0.929 ± 0.020        | all*                |
|                     |                    |                      |                      |               |                              |                    |                      |                      |                      |                      | Majority            | 0.543 ± 0.027        | 0.000 ± 0.000        | <b>1.000 ± 0.000</b> | –                    | –                   |
|                     |                    |                      |                      |               |                              |                    |                      |                      |                      |                      | Naive Bayes         | 0.857 ± 0.028        | 0.748 ± 0.046        | 0.948 ± 0.018        | 0.826 ± 0.033        | all                 |
|                     |                    |                      |                      |               |                              |                    |                      |                      |                      |                      | Poly-SVM            | 0.947 ± 0.021        | 0.932 ± 0.053        | 0.960 ± 0.028        | 0.941 ± 0.023        | all                 |
|                     |                    |                      |                      |               |                              |                    |                      |                      |                      |                      | RBF-SVM             | 0.945 ± 0.024        | 0.927 ± 0.057        | 0.960 ± 0.028        | 0.938 ± 0.027        | all                 |
|                     |                    |                      |                      |               |                              |                    |                      |                      |                      |                      | Random Forests      | 0.937 ± 0.018        | 0.924 ± 0.045        | 0.948 ± 0.026        | 0.930 ± 0.021        | 4726.5 ± 4502.3     |
|                     | CART <sub>b</sub>  | <b>0.972 ± 0.022</b> | 0.970 ± 0.048        | 0.974 ± 0.010 | <b>0.969 ± 0.025</b>         |                    |                      |                      |                      |                      | 2.9 ± 0.3           |                      |                      |                      |                      |                     |
|                     | CART <sub>cv</sub> | <b>0.977 ± 0.008</b> | <b>0.981 ± 0.019</b> | 0.974 ± 0.010 | <b>0.975 ± 0.009</b>         |                    |                      |                      |                      |                      | 3.0 ± 0.0           |                      |                      |                      |                      |                     |
|                     | SCM <sub>b</sub>   | <b>0.972 ± 0.022</b> | 0.970 ± 0.048        | 0.974 ± 0.010 | <b>0.969 ± 0.025</b>         |                    |                      |                      |                      |                      | 2.9 ± 0.3           |                      |                      |                      |                      |                     |
|                     | SCM <sub>cv</sub>  | <b>0.977 ± 0.008</b> | <b>0.981 ± 0.019</b> | 0.974 ± 0.010 | <b>0.975 ± 0.009</b>         |                    |                      |                      |                      |                      | 3.0 ± 0.0           |                      |                      |                      |                      |                     |
|                     | clindamycin        | 265                  | 34                   | 231           | 17.8                         |                    |                      |                      |                      |                      | L1-logistic         | <b>0.998 ± 0.006</b> | 0.989 ± 0.035        | <b>1.000 ± 0.000</b> | <b>0.994 ± 0.019</b> | 1153.1 ± 828.3      |
|                     |                    |                      |                      |               |                              |                    |                      |                      |                      |                      | L2-logistic         | 0.974 ± 0.020        | 0.889 ± 0.107        | 0.986 ± 0.017        | 0.904 ± 0.060        | all*                |
| Majority            |                    |                      |                      |               |                              |                    |                      |                      |                      |                      | 0.872 ± 0.057       | 0.000 ± 0.000        | <b>1.000 ± 0.000</b> | –                    | –                    |                     |
| Naive Bayes         |                    |                      |                      |               |                              |                    |                      |                      |                      |                      | 0.734 ± 0.043       | <b>1.000 ± 0.000</b> | 0.695 ± 0.047        | 0.473 ± 0.120        | all                  |                     |
| Poly-SVM            |                    |                      |                      |               |                              |                    |                      |                      |                      |                      | 0.964 ± 0.017       | 0.877 ± 0.124        | 0.978 ± 0.016        | 0.859 ± 0.041        | all                  |                     |

Continued on next page

**Table S1.** (Continued)

| Species          | Antibiotic         | Genomes            | Resistant          | Susceptible        | <i>k</i> -mers<br>(millions) | Method             | Accuracy           | Sensitivity        | Specificity        | F1 score           | Complexity         |                    |                    |                    |                   |
|------------------|--------------------|--------------------|--------------------|--------------------|------------------------------|--------------------|--------------------|--------------------|--------------------|--------------------|--------------------|--------------------|--------------------|--------------------|-------------------|
| <i>S. aureus</i> | moxifloxacin       | 462                | 188                | 274                | 19.8                         | RBF-SVM            | 0.960±0.023        | 0.889±0.107        | 0.971±0.021        | 0.854±0.043        | all                |                    |                    |                    |                   |
|                  |                    |                    |                    |                    |                              | Random Forests     | <b>0.994±0.009</b> | 0.963±0.059        | <b>1.000±0.000</b> | 0.981±0.032        | 60.1 ± 77.0        |                    |                    |                    |                   |
|                  |                    |                    |                    |                    |                              | CART <sub>b</sub>  | 0.972±0.020        | 0.931±0.112        | 0.981±0.016        | 0.888±0.077        | 1.8 ± 0.4          |                    |                    |                    |                   |
|                  |                    |                    |                    |                    |                              | CART <sub>cv</sub> | 0.975±0.022        | 0.931±0.112        | 0.985±0.015        | 0.913±0.067        | 1.6 ± 0.5          |                    |                    |                    |                   |
|                  |                    |                    |                    |                    |                              | SCM <sub>b</sub>   | 0.975±0.022        | 0.967±0.075        | 0.978±0.014        | 0.904±0.083        | 2.0 ± 0.0          |                    |                    |                    |                   |
|                  |                    |                    |                    |                    |                              | SCM <sub>cv</sub>  | 0.975±0.022        | 0.931±0.112        | 0.985±0.015        | 0.913±0.067        | 1.6 ± 0.5          |                    |                    |                    |                   |
|                  |                    |                    |                    |                    |                              | L1-logistic        | 0.957±0.027        | 0.921±0.040        | 0.980±0.038        | 0.944±0.033        | 121.8 ± 12.6       |                    |                    |                    |                   |
|                  |                    |                    |                    |                    |                              | L2-logistic        | 0.936±0.020        | 0.907±0.042        | 0.955±0.029        | 0.918±0.028        | all*               |                    |                    |                    |                   |
|                  |                    |                    |                    |                    |                              | Majority           | 0.599±0.029        | 0.000±0.000        | <b>1.000±0.000</b> | –                  | –                  |                    |                    |                    |                   |
|                  |                    |                    |                    |                    |                              | Naive Bayes        | 0.887±0.035        | 0.820±0.065        | 0.931±0.042        | 0.852±0.048        | all                |                    |                    |                    |                   |
|                  |                    |                    |                    |                    |                              | Poly-SVM           | 0.949±0.014        | 0.904±0.044        | 0.978±0.022        | 0.934±0.020        | all                |                    |                    |                    |                   |
|                  |                    |                    |                    |                    |                              | RBF-SVM            | 0.951±0.014        | 0.898±0.048        | 0.985±0.018        | 0.935±0.023        | all                |                    |                    |                    |                   |
|                  |                    |                    |                    |                    |                              | Random Forests     | 0.949±0.015        | 0.904±0.044        | 0.978±0.022        | 0.934±0.021        | 662.2 ± 669.2      |                    |                    |                    |                   |
|                  |                    |                    |                    |                    |                              | CART <sub>b</sub>  | <b>0.982±0.009</b> | <b>0.959±0.023</b> | <b>0.996±0.008</b> | <b>0.976±0.012</b> | 1.0 ± 0.0          |                    |                    |                    |                   |
|                  |                    |                    |                    |                    |                              | CART <sub>cv</sub> | <b>0.982±0.009</b> | <b>0.959±0.023</b> | <b>0.996±0.008</b> | <b>0.976±0.012</b> | 1.1 ± 0.3          |                    |                    |                    |                   |
|                  |                    |                    |                    |                    |                              | SCM <sub>b</sub>   | <b>0.982±0.009</b> | <b>0.959±0.023</b> | <b>0.996±0.008</b> | <b>0.976±0.012</b> | 1.0 ± 0.0          |                    |                    |                    |                   |
|                  | SCM <sub>cv</sub>  | <b>0.982±0.009</b> | <b>0.959±0.023</b> | <b>0.996±0.008</b> | <b>0.976±0.012</b>           | 1.0 ± 0.0          |                    |                    |                    |                    |                    |                    |                    |                    |                   |
|                  | ciprofloxacin      | 1229               | 467                | 762                | 12.3                         | L1-logistic        | <b>0.983±0.008</b> | <b>0.967±0.015</b> | <b>0.994±0.005</b> | <b>0.978±0.011</b> | 912.2 ± 1731.0     |                    |                    |                    |                   |
|                  |                    |                    |                    |                    |                              | L2-logistic        | <b>0.975±0.011</b> | <b>0.962±0.022</b> | 0.984±0.011        | 0.969±0.014        | all*               |                    |                    |                    |                   |
|                  |                    |                    |                    |                    |                              | Majority           | 0.598±0.021        | 0.000±0.000        | <b>1.000±0.000</b> | –                  | –                  |                    |                    |                    |                   |
|                  |                    |                    |                    |                    |                              | Naive Bayes        | 0.892±0.009        | 0.812±0.020        | 0.945±0.013        | 0.858±0.011        | all                |                    |                    |                    |                   |
|                  |                    |                    |                    |                    |                              | Poly-SVM           | <b>0.976±0.011</b> | <b>0.960±0.019</b> | 0.986±0.009        | 0.969±0.013        | all                |                    |                    |                    |                   |
|                  |                    |                    |                    |                    |                              | RBF-SVM            | <b>0.976±0.010</b> | <b>0.960±0.017</b> | 0.988±0.009        | <b>0.970±0.012</b> | all                |                    |                    |                    |                   |
|                  |                    |                    |                    |                    |                              | Random Forests     | <b>0.976±0.010</b> | 0.956±0.023        | 0.989±0.003        | 0.969±0.012        | 16134.3 ± 13601.7  |                    |                    |                    |                   |
|                  |                    |                    |                    |                    |                              | CART <sub>b</sub>  | <b>0.983±0.007</b> | <b>0.965±0.014</b> | <b>0.996±0.004</b> | <b>0.979±0.008</b> | 1.0 ± 0.0          |                    |                    |                    |                   |
|                  |                    |                    |                    |                    |                              | CART <sub>cv</sub> | <b>0.983±0.006</b> | <b>0.967±0.015</b> | <b>0.994±0.006</b> | <b>0.978±0.008</b> | 1.3 ± 0.7          |                    |                    |                    |                   |
|                  |                    |                    |                    |                    |                              | SCM <sub>b</sub>   | <b>0.983±0.007</b> | <b>0.965±0.014</b> | <b>0.996±0.004</b> | <b>0.979±0.008</b> | 1.0 ± 0.0          |                    |                    |                    |                   |
|                  |                    |                    |                    |                    |                              | SCM <sub>cv</sub>  | <b>0.983±0.006</b> | <b>0.965±0.014</b> | <b>0.995±0.003</b> | <b>0.978±0.008</b> | 1.2 ± 0.4          |                    |                    |                    |                   |
| clindamycin      |                    |                    |                    |                    |                              | 624                | 350                | 274                | 9.6                | L1-logistic        | <b>0.969±0.013</b> | 0.978±0.017        | <b>0.955±0.034</b> | <b>0.972±0.012</b> | 710.4 ± 968.6     |
|                  | L2-logistic        | 0.957±0.013        | 0.962±0.029        | <b>0.949±0.025</b> | 0.962±0.014                  |                    |                    |                    |                    | all*               |                    |                    |                    |                    |                   |
|                  | Majority           | 0.566±0.045        | <b>1.000±0.000</b> | 0.000±0.000        | 0.722±0.039                  |                    |                    |                    |                    | –                  |                    |                    |                    |                    |                   |
|                  | Naive Bayes        | 0.866±0.036        | 0.888±0.039        | 0.836±0.052        | 0.882±0.029                  |                    |                    |                    |                    | all                |                    |                    |                    |                    |                   |
|                  | Poly-SVM           | 0.949±0.017        | 0.951±0.038        | 0.944±0.028        | 0.954±0.021                  |                    |                    |                    |                    | all                |                    |                    |                    |                    |                   |
|                  | RBF-SVM            | 0.950±0.011        | 0.954±0.030        | 0.942±0.026        | 0.955±0.015                  |                    |                    |                    |                    | all                |                    |                    |                    |                    |                   |
|                  | Random Forests     | <b>0.961±0.014</b> | 0.966±0.026        | <b>0.953±0.033</b> | <b>0.966±0.012</b>           |                    |                    |                    |                    | 3976.7 ± 4930.6    |                    |                    |                    |                    |                   |
|                  | CART <sub>b</sub>  | <b>0.961±0.014</b> | 0.972±0.025        | <b>0.946±0.033</b> | <b>0.965±0.013</b>           |                    |                    |                    |                    | 2.6 ± 1.3          |                    |                    |                    |                    |                   |
|                  | CART <sub>cv</sub> | 0.958±0.008        | 0.965±0.022        | <b>0.947±0.030</b> | <b>0.963±0.008</b>           |                    |                    |                    |                    | 4.4 ± 2.2          |                    |                    |                    |                    |                   |
|                  | SCM <sub>b</sub>   | <b>0.961±0.016</b> | 0.971±0.020        | <b>0.947±0.035</b> | <b>0.966±0.014</b>           |                    |                    |                    |                    | 2.0 ± 0.0          |                    |                    |                    |                    |                   |
|                  | SCM <sub>cv</sub>  | <b>0.961±0.016</b> | 0.971±0.020        | <b>0.947±0.035</b> | <b>0.966±0.014</b>           |                    |                    |                    |                    | 2.2 ± 0.4          |                    |                    |                    |                    |                   |
|                  | erythromycin       | 1305               | 484                | 821                | 12.4                         |                    |                    |                    |                    | L1-logistic        | <b>0.976±0.009</b> | <b>0.978±0.012</b> | 0.976±0.016        | <b>0.970±0.012</b> | 10563.3 ± 27868.0 |
|                  |                    |                    |                    |                    |                              |                    |                    |                    |                    | L2-logistic        | <b>0.976±0.006</b> | <b>0.977±0.008</b> | 0.976±0.009        | <b>0.970±0.007</b> | all*              |
|                  |                    |                    |                    |                    |                              |                    |                    |                    |                    | Majority           | 0.611±0.019        | 0.000±0.000        | <b>1.000±0.000</b> | –                  | –                 |
|                  |                    |                    |                    |                    |                              |                    |                    |                    |                    | Naive Bayes        | 0.764±0.027        | 0.772±0.060        | 0.759±0.024        | 0.717±0.041        | all               |
|                  |                    |                    |                    |                    |                              |                    |                    |                    |                    | Poly-SVM           | <b>0.975±0.010</b> | <b>0.979±0.010</b> | 0.973±0.016        | <b>0.968±0.013</b> | all               |
| RBF-SVM          |                    |                    |                    |                    |                              | <b>0.973±0.010</b> | <b>0.975±0.009</b> | 0.972±0.018        | <b>0.966±0.013</b> | all                |                    |                    |                    |                    |                   |

Continued on next page

**Table S1.** (Continued)

| Species            | Antibiotic           | Genomes              | Resistant            | Susceptible          | <i>k</i> -mers<br>(millions) | Method               | Accuracy             | Sensitivity          | Specificity          | F1 score        | Complexity |
|--------------------|----------------------|----------------------|----------------------|----------------------|------------------------------|----------------------|----------------------|----------------------|----------------------|-----------------|------------|
| fusidic acid       | 986                  | 82                   | 904                  | 11.9                 | Random Forests               | <b>0.969 ± 0.010</b> | <b>0.978 ± 0.007</b> | 0.963 ± 0.017        | <b>0.961 ± 0.012</b> | 6113.3 ± 7868.4 |            |
|                    |                      |                      |                      |                      | CART <sub>b</sub>            | <b>0.976 ± 0.009</b> | <b>0.975 ± 0.009</b> | 0.976 ± 0.016        | <b>0.969 ± 0.012</b> | 3.0 ± 0.0       |            |
|                    |                      |                      |                      |                      | CART <sub>cv</sub>           | <b>0.974 ± 0.008</b> | <b>0.975 ± 0.011</b> | 0.974 ± 0.016        | <b>0.967 ± 0.011</b> | 3.6 ± 1.3       |            |
|                    |                      |                      |                      |                      | SCM <sub>b</sub>             | <b>0.976 ± 0.010</b> | <b>0.977 ± 0.008</b> | 0.976 ± 0.016        | <b>0.970 ± 0.012</b> | 3.0 ± 0.0       |            |
|                    |                      |                      |                      |                      | SCM <sub>cv</sub>            | <b>0.973 ± 0.012</b> | <b>0.975 ± 0.006</b> | 0.972 ± 0.020        | <b>0.966 ± 0.015</b> | 4.6 ± 2.1       |            |
|                    |                      |                      |                      |                      | L1-logistic                  | <b>0.984 ± 0.009</b> | 0.844 ± 0.117        | <b>0.997 ± 0.003</b> | 0.896 ± 0.068        | 3120.5 ± 947.0  |            |
|                    |                      |                      |                      |                      | L2-logistic                  | 0.969 ± 0.012        | 0.713 ± 0.152        | <b>0.994 ± 0.005</b> | 0.793 ± 0.092        | all*            |            |
|                    |                      |                      |                      |                      | Majority                     | 0.911 ± 0.019        | 0.000 ± 0.000        | <b>1.000 ± 0.000</b> | –                    | –               |            |
|                    |                      |                      |                      |                      | Naive Bayes                  | 0.675 ± 0.082        | 0.767 ± 0.122        | 0.664 ± 0.092        | 0.301 ± 0.065        | all             |            |
|                    |                      |                      |                      |                      | Poly-SVM                     | 0.968 ± 0.015        | 0.686 ± 0.153        | <b>0.995 ± 0.006</b> | 0.780 ± 0.112        | all             |            |
|                    |                      |                      |                      |                      | RBF-SVM                      | 0.969 ± 0.015        | 0.712 ± 0.167        | <b>0.994 ± 0.005</b> | 0.793 ± 0.108        | all             |            |
|                    |                      |                      |                      |                      | Random Forests               | <b>0.975 ± 0.014</b> | 0.732 ± 0.145        | <b>0.999 ± 0.002</b> | 0.832 ± 0.095        | 4322.9 ± 7941.6 |            |
|                    |                      |                      |                      |                      | CART <sub>b</sub>            | <b>0.976 ± 0.011</b> | 0.811 ± 0.135        | <b>0.991 ± 0.005</b> | 0.843 ± 0.089        | 2.5 ± 0.5       |            |
|                    |                      |                      |                      |                      | CART <sub>cv</sub>           | <b>0.984 ± 0.010</b> | <b>0.917 ± 0.077</b> | <b>0.991 ± 0.005</b> | <b>0.907 ± 0.053</b> | 3.7 ± 0.9       |            |
|                    |                      |                      |                      |                      | SCM <sub>b</sub>             | <b>0.979 ± 0.011</b> | 0.855 ± 0.114        | <b>0.991 ± 0.005</b> | 0.871 ± 0.068        | 2.7 ± 0.5       |            |
|                    |                      |                      |                      |                      | SCM <sub>cv</sub>            | <b>0.983 ± 0.010</b> | <b>0.917 ± 0.077</b> | 0.990 ± 0.006        | <b>0.904 ± 0.054</b> | 3.2 ± 0.6       |            |
| gentamicin         | 1306                 | 162                  | 1144                 | 12.4                 | L1-logistic                  | <b>0.997 ± 0.003</b> | <b>0.981 ± 0.018</b> | <b>0.999 ± 0.002</b> | <b>0.985 ± 0.013</b> | 136.0 ± 309.3   |            |
|                    |                      |                      |                      |                      | L2-logistic                  | <b>0.993 ± 0.005</b> | 0.945 ± 0.053        | <b>0.999 ± 0.003</b> | 0.966 ± 0.031        | all*            |            |
|                    |                      |                      |                      |                      | Majority                     | 0.874 ± 0.019        | 0.000 ± 0.000        | <b>1.000 ± 0.000</b> | –                    | –               |            |
|                    |                      |                      |                      |                      | Naive Bayes                  | 0.949 ± 0.038        | 0.906 ± 0.061        | 0.954 ± 0.042        | 0.826 ± 0.104        | all             |            |
|                    |                      |                      |                      |                      | Poly-SVM                     | <b>0.989 ± 0.006</b> | 0.921 ± 0.056        | <b>0.998 ± 0.003</b> | 0.952 ± 0.032        | all             |            |
|                    |                      |                      |                      |                      | RBF-SVM                      | <b>0.990 ± 0.006</b> | 0.921 ± 0.056        | <b>0.999 ± 0.002</b> | 0.953 ± 0.033        | all             |            |
|                    |                      |                      |                      |                      | Random Forests               | <b>0.995 ± 0.004</b> | 0.968 ± 0.043        | <b>0.999 ± 0.002</b> | <b>0.979 ± 0.024</b> | 432.2 ± 714.2   |            |
|                    |                      |                      |                      |                      | CART <sub>b</sub>            | <b>0.996 ± 0.003</b> | <b>0.975 ± 0.019</b> | <b>0.999 ± 0.002</b> | <b>0.983 ± 0.012</b> | 1.0 ± 0.0       |            |
|                    |                      |                      |                      |                      | CART <sub>cv</sub>           | <b>0.996 ± 0.003</b> | <b>0.975 ± 0.019</b> | <b>0.999 ± 0.002</b> | <b>0.983 ± 0.012</b> | 1.0 ± 0.0       |            |
|                    |                      |                      |                      |                      | SCM <sub>b</sub>             | <b>0.996 ± 0.003</b> | <b>0.975 ± 0.019</b> | <b>0.999 ± 0.002</b> | <b>0.983 ± 0.012</b> | 1.0 ± 0.0       |            |
|                    |                      |                      |                      |                      | SCM <sub>cv</sub>            | <b>0.994 ± 0.004</b> | 0.967 ± 0.027        | <b>0.998 ± 0.002</b> | <b>0.977 ± 0.016</b> | 1.2 ± 0.4       |            |
|                    |                      |                      |                      |                      | L1-logistic                  | <b>0.988 ± 0.005</b> | <b>0.985 ± 0.010</b> | <b>0.991 ± 0.007</b> | <b>0.987 ± 0.005</b> | 230.6 ± 212.3   |            |
|                    |                      |                      |                      |                      | L2-logistic                  | <b>0.987 ± 0.003</b> | <b>0.984 ± 0.010</b> | 0.990 ± 0.007        | <b>0.986 ± 0.003</b> | all*            |            |
|                    |                      |                      |                      |                      | Majority                     | 0.544 ± 0.016        | 0.000 ± 0.000        | <b>1.000 ± 0.000</b> | –                    | –               |            |
|                    |                      |                      |                      |                      | Naive Bayes                  | 0.868 ± 0.019        | 0.875 ± 0.030        | 0.862 ± 0.020        | 0.858 ± 0.019        | all             |            |
|                    |                      |                      |                      |                      | Poly-SVM                     | <b>0.987 ± 0.004</b> | <b>0.983 ± 0.010</b> | <b>0.991 ± 0.007</b> | <b>0.986 ± 0.005</b> | all             |            |
| RBF-SVM            | <b>0.987 ± 0.004</b> | <b>0.983 ± 0.010</b> | 0.990 ± 0.008        | <b>0.985 ± 0.004</b> | all                          |                      |                      |                      |                      |                 |            |
| Random Forests     | <b>0.987 ± 0.004</b> | <b>0.982 ± 0.011</b> | <b>0.991 ± 0.007</b> | <b>0.986 ± 0.004</b> | 408.8 ± 570.1                |                      |                      |                      |                      |                 |            |
| CART <sub>b</sub>  | <b>0.987 ± 0.005</b> | <b>0.984 ± 0.010</b> | 0.990 ± 0.007        | <b>0.986 ± 0.005</b> | 1.0 ± 0.0                    |                      |                      |                      |                      |                 |            |
| CART <sub>cv</sub> | <b>0.987 ± 0.005</b> | <b>0.983 ± 0.011</b> | 0.990 ± 0.007        | <b>0.985 ± 0.006</b> | 1.6 ± 1.6                    |                      |                      |                      |                      |                 |            |
| SCM <sub>b</sub>   | <b>0.987 ± 0.005</b> | <b>0.984 ± 0.010</b> | 0.990 ± 0.007        | <b>0.986 ± 0.005</b> | 1.0 ± 0.0                    |                      |                      |                      |                      |                 |            |
| SCM <sub>cv</sub>  | <b>0.987 ± 0.005</b> | <b>0.983 ± 0.010</b> | 0.990 ± 0.007        | <b>0.986 ± 0.005</b> | 1.9 ± 0.6                    |                      |                      |                      |                      |                 |            |
| oxacillin          | 85                   | 39                   | 46                   | 6.1                  | L1-logistic                  | 0.988 ± 0.025        | 0.980 ± 0.043        | <b>1.000 ± 0.000</b> | 0.989 ± 0.023        | 97.6 ± 47.0     |            |
|                    |                      |                      |                      |                      | L2-logistic                  | 0.988 ± 0.025        | 0.980 ± 0.043        | <b>1.000 ± 0.000</b> | 0.989 ± 0.023        | all*            |            |
|                    |                      |                      |                      |                      | Majority                     | 0.465 ± 0.131        | 0.100 ± 0.316        | 0.900 ± 0.316        | –                    | –               |            |
|                    |                      |                      |                      |                      | Naive Bayes                  | 0.635 ± 0.072        | 0.777 ± 0.136        | 0.500 ± 0.153        | 0.658 ± 0.091        | all             |            |
|                    |                      |                      |                      |                      | Poly-SVM                     | 0.988 ± 0.025        | 0.980 ± 0.043        | <b>1.000 ± 0.000</b> | 0.989 ± 0.023        | all             |            |
|                    |                      |                      |                      |                      | RBF-SVM                      | <b>1.000 ± 0.000</b> | <b>1.000 ± 0.000</b> | <b>1.000 ± 0.000</b> | <b>1.000 ± 0.000</b> | all             |            |
|                    |                      |                      |                      |                      | Random Forests               | 0.988 ± 0.025        | 0.980 ± 0.043        | <b>1.000 ± 0.000</b> | 0.989 ± 0.023        | 15.9 ± 3.0      |            |

Continued on next page

**Table S1.** (Continued)

| Species            | Antibiotic                         | Genomes              | Resistant            | Susceptible          | <i>k</i> -mers<br>(millions) | Method             | Accuracy             | Sensitivity          | Specificity          | F1 score             | Complexity          |                |                      |                      |                      |                      |                    |
|--------------------|------------------------------------|----------------------|----------------------|----------------------|------------------------------|--------------------|----------------------|----------------------|----------------------|----------------------|---------------------|----------------|----------------------|----------------------|----------------------|----------------------|--------------------|
|                    | penicillin                         | 1042                 | 886                  | 156                  | 12.1                         | CART <sub>b</sub>  | 0.988 ± 0.025        | 0.980 ± 0.043        | <b>1.000 ± 0.000</b> | 0.989 ± 0.023        | 1.0 ± 0.0           |                |                      |                      |                      |                      |                    |
|                    |                                    |                      |                      |                      |                              | CART <sub>cv</sub> | 0.988 ± 0.025        | 0.980 ± 0.043        | <b>1.000 ± 0.000</b> | 0.989 ± 0.023        | 1.0 ± 0.0           |                |                      |                      |                      |                      |                    |
|                    |                                    |                      |                      |                      |                              | SCM <sub>b</sub>   | 0.988 ± 0.025        | 0.980 ± 0.043        | <b>1.000 ± 0.000</b> | 0.989 ± 0.023        | 1.0 ± 0.0           |                |                      |                      |                      |                      |                    |
|                    |                                    |                      |                      |                      |                              | SCM <sub>cv</sub>  | 0.988 ± 0.025        | 0.980 ± 0.043        | <b>1.000 ± 0.000</b> | 0.989 ± 0.023        | 1.0 ± 0.0           |                |                      |                      |                      |                      |                    |
|                    |                                    |                      |                      |                      |                              | L1-logistic        | <b>0.974 ± 0.013</b> | 0.981 ± 0.010        | <b>0.934 ± 0.051</b> | <b>0.985 ± 0.008</b> | 178881.5 ± 306100.4 |                |                      |                      |                      |                      |                    |
|                    |                                    |                      |                      |                      |                              | L2-logistic        | <b>0.976 ± 0.011</b> | 0.984 ± 0.009        | <b>0.931 ± 0.055</b> | <b>0.986 ± 0.007</b> | all*                |                |                      |                      |                      |                      |                    |
|                    |                                    |                      |                      |                      |                              | Majority           | 0.853 ± 0.022        | <b>1.000 ± 0.000</b> | 0.000 ± 0.000        | 0.921 ± 0.013        | –                   |                |                      |                      |                      |                      |                    |
|                    |                                    |                      |                      |                      |                              | Naive Bayes        | 0.518 ± 0.041        | 0.468 ± 0.045        | 0.817 ± 0.059        | 0.622 ± 0.039        | all                 |                |                      |                      |                      |                      |                    |
|                    |                                    |                      |                      |                      |                              | Poly-SVM           | <b>0.980 ± 0.011</b> | 0.990 ± 0.007        | 0.923 ± 0.047        | <b>0.988 ± 0.007</b> | all                 |                |                      |                      |                      |                      |                    |
|                    |                                    |                      |                      |                      |                              | RBF-SVM            | <b>0.977 ± 0.013</b> | 0.988 ± 0.010        | 0.916 ± 0.052        | <b>0.986 ± 0.008</b> | all                 |                |                      |                      |                      |                      |                    |
|                    |                                    |                      |                      |                      |                              | Random Forests     | <b>0.976 ± 0.011</b> | 0.985 ± 0.007        | <b>0.927 ± 0.051</b> | <b>0.986 ± 0.007</b> | 4354.3 ± 7268.1     |                |                      |                      |                      |                      |                    |
|                    |                                    |                      |                      |                      |                              | CART <sub>b</sub>  | <b>0.973 ± 0.011</b> | 0.980 ± 0.007        | <b>0.934 ± 0.051</b> | <b>0.984 ± 0.007</b> | 1.7 ± 0.5           |                |                      |                      |                      |                      |                    |
|                    |                                    |                      |                      |                      |                              | CART <sub>cv</sub> | <b>0.971 ± 0.011</b> | 0.979 ± 0.010        | <b>0.930 ± 0.047</b> | <b>0.983 ± 0.007</b> | 2.5 ± 0.7           |                |                      |                      |                      |                      |                    |
|                    |                                    |                      |                      |                      |                              | SCM <sub>b</sub>   | <b>0.975 ± 0.012</b> | 0.983 ± 0.007        | <b>0.927 ± 0.057</b> | <b>0.985 ± 0.007</b> | 1.7 ± 0.5           |                |                      |                      |                      |                      |                    |
|                    |                                    |                      |                      |                      |                              | SCM <sub>cv</sub>  | <b>0.975 ± 0.012</b> | 0.985 ± 0.006        | 0.920 ± 0.056        | <b>0.985 ± 0.007</b> | 2.5 ± 1.0           |                |                      |                      |                      |                      |                    |
|                    |                                    |                      |                      |                      |                              |                    | tetracycline         | 1232                 | 203                  | 1029                 | 12.3                | L1-logistic    | <b>0.986 ± 0.005</b> | <b>0.966 ± 0.029</b> | <b>0.991 ± 0.005</b> | <b>0.961 ± 0.015</b> | 78129.4 ± 175973.3 |
|                    |                                    |                      |                      |                      |                              |                    |                      |                      |                      |                      |                     | L2-logistic    | <b>0.986 ± 0.006</b> | <b>0.957 ± 0.034</b> | <b>0.992 ± 0.006</b> | <b>0.960 ± 0.017</b> | all*               |
|                    |                                    |                      |                      |                      |                              |                    |                      |                      |                      |                      |                     | Majority       | 0.820 ± 0.012        | 0.000 ± 0.000        | <b>1.000 ± 0.000</b> | –                    | –                  |
| Naive Bayes        | 0.919 ± 0.012                      | 0.774 ± 0.075        | 0.951 ± 0.011        | 0.773 ± 0.044        | all                          |                    |                      |                      |                      |                      |                     |                |                      |                      |                      |                      |                    |
| Poly-SVM           | <b>0.982 ± 0.007</b>               | 0.942 ± 0.045        | <b>0.991 ± 0.005</b> | 0.949 ± 0.022        | all                          |                    |                      |                      |                      |                      |                     |                |                      |                      |                      |                      |                    |
| RBF-SVM            | <b>0.983 ± 0.008</b>               | 0.946 ± 0.044        | <b>0.991 ± 0.006</b> | 0.952 ± 0.023        | all                          |                    |                      |                      |                      |                      |                     |                |                      |                      |                      |                      |                    |
| Random Forests     | <b>0.987 ± 0.006</b>               | <b>0.964 ± 0.031</b> | <b>0.993 ± 0.007</b> | <b>0.965 ± 0.019</b> | 1572.5 ± 3038.9              |                    |                      |                      |                      |                      |                     |                |                      |                      |                      |                      |                    |
| CART <sub>b</sub>  | <b>0.986 ± 0.005</b>               | <b>0.966 ± 0.022</b> | <b>0.991 ± 0.005</b> | <b>0.961 ± 0.015</b> | 2.0 ± 0.0                    |                    |                      |                      |                      |                      |                     |                |                      |                      |                      |                      |                    |
| CART <sub>cv</sub> | <b>0.986 ± 0.005</b>               | <b>0.966 ± 0.022</b> | <b>0.991 ± 0.005</b> | <b>0.961 ± 0.015</b> | 2.0 ± 0.0                    |                    |                      |                      |                      |                      |                     |                |                      |                      |                      |                      |                    |
| SCM <sub>b</sub>   | <b>0.986 ± 0.005</b>               | <b>0.966 ± 0.022</b> | <b>0.991 ± 0.005</b> | <b>0.961 ± 0.015</b> | 2.0 ± 0.0                    |                    |                      |                      |                      |                      |                     |                |                      |                      |                      |                      |                    |
| SCM <sub>cv</sub>  | <b>0.986 ± 0.005</b>               | <b>0.966 ± 0.022</b> | <b>0.991 ± 0.005</b> | <b>0.961 ± 0.015</b> | 2.0 ± 0.0                    |                    |                      |                      |                      |                      |                     |                |                      |                      |                      |                      |                    |
|                    | trimethoprim/sul-<br>famethoxazole | 320                  | 142                  | 178                  | 6.9                          |                    |                      |                      |                      |                      |                     | L1-logistic    | 0.947 ± 0.025        | 0.889 ± 0.052        | 0.987 ± 0.018        | 0.931 ± 0.035        | 43517.4 ± 92826.5  |
|                    |                                    |                      |                      |                      |                              |                    |                      |                      |                      |                      |                     | L2-logistic    | <b>0.950 ± 0.022</b> | 0.901 ± 0.049        | 0.985 ± 0.021        | 0.935 ± 0.034        | all*               |
|                    |                                    |                      |                      |                      |                              |                    |                      |                      |                      |                      |                     | Majority       | 0.578 ± 0.054        | 0.000 ± 0.000        | <b>1.000 ± 0.000</b> | –                    | –                  |
|                    |                                    |                      |                      |                      |                              |                    |                      |                      |                      |                      |                     | Naive Bayes    | 0.928 ± 0.038        | <b>0.916 ± 0.038</b> | 0.936 ± 0.046        | 0.913 ± 0.049        | all                |
|                    |                                    |                      |                      |                      |                              |                    |                      |                      |                      |                      |                     | Poly-SVM       | 0.945 ± 0.025        | 0.889 ± 0.052        | 0.984 ± 0.022        | 0.930 ± 0.035        | all                |
|                    |                                    |                      |                      |                      |                              |                    |                      |                      |                      |                      |                     | RBF-SVM        | 0.941 ± 0.027        | 0.889 ± 0.052        | 0.977 ± 0.029        | 0.923 ± 0.039        | all                |
|                    |                                    |                      |                      |                      |                              |                    |                      |                      |                      |                      |                     | Random Forests | <b>0.956 ± 0.019</b> | 0.901 ± 0.050        | <b>0.995 ± 0.011</b> | <b>0.943 ± 0.026</b> | 218.3 ± 415.7      |
|                    |                                    |                      |                      |                      |                              | CART <sub>b</sub>  | <b>0.959 ± 0.020</b> | 0.901 ± 0.050        | <b>1.000 ± 0.000</b> | <b>0.947 ± 0.027</b> | 1.0 ± 0.0           |                |                      |                      |                      |                      |                    |
|                    |                                    |                      |                      |                      |                              | CART <sub>cv</sub> | <b>0.959 ± 0.020</b> | 0.901 ± 0.050        | <b>1.000 ± 0.000</b> | <b>0.947 ± 0.027</b> | 1.0 ± 0.0           |                |                      |                      |                      |                      |                    |
|                    |                                    |                      |                      |                      |                              | SCM <sub>b</sub>   | <b>0.959 ± 0.020</b> | 0.901 ± 0.050        | <b>1.000 ± 0.000</b> | <b>0.947 ± 0.027</b> | 1.0 ± 0.0           |                |                      |                      |                      |                      |                    |
|                    |                                    |                      |                      |                      |                              | SCM <sub>cv</sub>  | <b>0.959 ± 0.020</b> | 0.901 ± 0.050        | <b>1.000 ± 0.000</b> | <b>0.947 ± 0.027</b> | 1.3 ± 0.9           |                |                      |                      |                      |                      |                    |
|                    |                                    |                      |                      |                      |                              | <i>S. enterica</i> | ampicillin           | 347                  | 279                  | 68                   | L1-logistic         | 0.875 ± 0.041  | 0.914 ± 0.042        | 0.741 ± 0.172        | 0.920 ± 0.028        | 836.0 ± 972.0        |                    |
| L2-logistic        | 0.913 ± 0.026                      | 0.940 ± 0.030        | 0.822 ± 0.098        | <b>0.944 ± 0.018</b> | all*                         |                    |                      |                      |                      |                      |                     |                |                      |                      |                      |                      |                    |
| Majority           | 0.791 ± 0.034                      | <b>1.000 ± 0.000</b> | 0.000 ± 0.000        | 0.883 ± 0.022        | –                            |                    |                      |                      |                      |                      |                     |                |                      |                      |                      |                      |                    |
| Naive Bayes        | 0.817 ± 0.038                      | 0.969 ± 0.017        | 0.246 ± 0.113        | 0.893 ± 0.023        | all                          |                    |                      |                      |                      |                      |                     |                |                      |                      |                      |                      |                    |
| Poly-SVM           | 0.909 ± 0.033                      | 0.971 ± 0.020        | 0.685 ± 0.112        | <b>0.943 ± 0.021</b> | all                          |                    |                      |                      |                      |                      |                     |                |                      |                      |                      |                      |                    |
| RBF-SVM            | 0.907 ± 0.031                      | 0.973 ± 0.018        | 0.672 ± 0.111        | <b>0.943 ± 0.020</b> | all                          |                    |                      |                      |                      |                      |                     |                |                      |                      |                      |                      |                    |
| Random Forests     | 0.910 ± 0.037                      | 0.967 ± 0.014        | 0.707 ± 0.152        | <b>0.944 ± 0.023</b> | 3816.2 ± 4902.6              |                    |                      |                      |                      |                      |                     |                |                      |                      |                      |                      |                    |

Continued on next page

**Table S1.** (Continued)

| Species            | Antibiotic           | Genomes              | Resistant            | Susceptible          | <i>k</i> -mers<br>(millions) | Method             | Accuracy             | Sensitivity          | Specificity          | F1 score             | Complexity      |             |               |                      |                      |                      |                 |
|--------------------|----------------------|----------------------|----------------------|----------------------|------------------------------|--------------------|----------------------|----------------------|----------------------|----------------------|-----------------|-------------|---------------|----------------------|----------------------|----------------------|-----------------|
| chloramphenicol    |                      | 251                  | 96                   |                      |                              | CART <sub>b</sub>  | 0.894 ± 0.041        | 0.919 ± 0.043        | 0.803 ± 0.165        | 0.932 ± 0.028        | 1.5 ± 0.8       |             |               |                      |                      |                      |                 |
|                    |                      |                      |                      |                      |                              | CART <sub>cv</sub> | <b>0.925 ± 0.039</b> | 0.945 ± 0.037        | <b>0.855 ± 0.087</b> | <b>0.951 ± 0.027</b> | 6.1 ± 3.1       |             |               |                      |                      |                      |                 |
|                    |                      |                      |                      |                      |                              | SCM <sub>b</sub>   | 0.881 ± 0.037        | 0.912 ± 0.037        | 0.769 ± 0.199        | 0.924 ± 0.025        | 1.4 ± 0.5       |             |               |                      |                      |                      |                 |
|                    |                      |                      |                      |                      |                              | SCM <sub>cv</sub>  | <b>0.920 ± 0.040</b> | 0.950 ± 0.040        | 0.808 ± 0.089        | <b>0.949 ± 0.027</b> | 5.5 ± 1.6       |             |               |                      |                      |                      |                 |
|                    |                      |                      |                      |                      |                              | L1-logistic        | <b>0.925 ± 0.039</b> | 0.953 ± 0.023        | <b>0.867 ± 0.107</b> | <b>0.946 ± 0.030</b> | 991.2 ± 1463.9  |             |               |                      |                      |                      |                 |
|                    |                      |                      |                      |                      |                              | L2-logistic        | <b>0.929 ± 0.033</b> | 0.959 ± 0.021        | <b>0.864 ± 0.102</b> | <b>0.950 ± 0.026</b> | all*            |             |               |                      |                      |                      |                 |
|                    |                      |                      |                      |                      |                              | Majority           | 0.709 ± 0.054        | <b>1.000 ± 0.000</b> | 0.000 ± 0.000        | 0.828 ± 0.037        | –               |             |               |                      |                      |                      |                 |
|                    |                      |                      |                      |                      |                              | Naive Bayes        | 0.759 ± 0.053        | <b>0.992 ± 0.011</b> | 0.198 ± 0.092        | 0.853 ± 0.036        | all             |             |               |                      |                      |                      |                 |
|                    |                      |                      |                      |                      |                              | Poly-SVM           | <b>0.920 ± 0.030</b> | 0.970 ± 0.035        | 0.808 ± 0.053        | <b>0.944 ± 0.023</b> | all             |             |               |                      |                      |                      |                 |
|                    |                      |                      |                      |                      |                              | RBF-SVM            | <b>0.928 ± 0.031</b> | 0.976 ± 0.024        | 0.822 ± 0.084        | <b>0.949 ± 0.023</b> | all             |             |               |                      |                      |                      |                 |
|                    |                      |                      |                      |                      |                              | Random Forests     | <b>0.926 ± 0.029</b> | 0.984 ± 0.019        | 0.791 ± 0.066        | <b>0.949 ± 0.022</b> | 2354.8 ± 2780.1 |             |               |                      |                      |                      |                 |
|                    |                      |                      |                      |                      |                              | CART <sub>b</sub>  | 0.913 ± 0.024        | 0.943 ± 0.035        | 0.848 ± 0.067        | 0.938 ± 0.020        | 1.0 ± 0.0       |             |               |                      |                      |                      |                 |
|                    |                      |                      |                      |                      |                              | CART <sub>cv</sub> | 0.900 ± 0.045        | 0.961 ± 0.032        | 0.761 ± 0.108        | 0.931 ± 0.033        | 3.6 ± 1.3       |             |               |                      |                      |                      |                 |
|                    |                      |                      |                      |                      |                              | SCM <sub>b</sub>   | 0.913 ± 0.024        | 0.943 ± 0.035        | 0.848 ± 0.067        | 0.938 ± 0.020        | 1.0 ± 0.0       |             |               |                      |                      |                      |                 |
| nalidixic acid     |                      | 35                   | 312                  |                      |                              | SCM <sub>cv</sub>  | 0.907 ± 0.025        | 0.941 ± 0.035        | 0.834 ± 0.089        | 0.934 ± 0.020        | 1.6 ± 1.3       |             |               |                      |                      |                      |                 |
|                    |                      |                      |                      |                      |                              | L1-logistic        | <b>0.978 ± 0.014</b> | <b>0.849 ± 0.129</b> | <b>0.994 ± 0.008</b> | <b>0.876 ± 0.078</b> | 181.0 ± 42.4    |             |               |                      |                      |                      |                 |
|                    |                      |                      |                      |                      |                              | L2-logistic        | 0.943 ± 0.029        | 0.622 ± 0.233        | 0.981 ± 0.019        | 0.659 ± 0.175        | all*            |             |               |                      |                      |                      |                 |
|                    |                      |                      |                      |                      |                              | Majority           | 0.906 ± 0.031        | 0.000 ± 0.000        | <b>1.000 ± 0.000</b> | –                    | –               |             |               |                      |                      |                      |                 |
|                    |                      |                      |                      |                      |                              | Naive Bayes        | 0.893 ± 0.034        | 0.049 ± 0.087        | 0.981 ± 0.018        | –                    | all             |             |               |                      |                      |                      |                 |
|                    |                      |                      |                      |                      |                              | Poly-SVM           | 0.938 ± 0.034        | 0.456 ± 0.269        | <b>0.991 ± 0.011</b> | –                    | all             |             |               |                      |                      |                      |                 |
|                    |                      |                      |                      |                      |                              | RBF-SVM            | 0.942 ± 0.029        | 0.474 ± 0.220        | <b>0.994 ± 0.008</b> | 0.592 ± 0.201        | all             |             |               |                      |                      |                      |                 |
|                    |                      |                      |                      |                      |                              | Random Forests     | 0.949 ± 0.024        | 0.589 ± 0.206        | <b>0.991 ± 0.008</b> | 0.674 ± 0.136        | 1871.7 ± 3412.6 |             |               |                      |                      |                      |                 |
|                    |                      |                      |                      |                      |                              | CART <sub>b</sub>  | <b>0.978 ± 0.014</b> | <b>0.849 ± 0.129</b> | <b>0.994 ± 0.008</b> | <b>0.876 ± 0.078</b> | 1.0 ± 0.0       |             |               |                      |                      |                      |                 |
|                    |                      |                      |                      |                      |                              | CART <sub>cv</sub> | <b>0.978 ± 0.014</b> | <b>0.849 ± 0.129</b> | <b>0.994 ± 0.008</b> | <b>0.876 ± 0.078</b> | 1.0 ± 0.0       |             |               |                      |                      |                      |                 |
|                    |                      |                      |                      |                      |                              | SCM <sub>b</sub>   | <b>0.978 ± 0.014</b> | <b>0.849 ± 0.129</b> | <b>0.994 ± 0.008</b> | <b>0.876 ± 0.078</b> | 1.0 ± 0.0       |             |               |                      |                      |                      |                 |
|                    |                      |                      |                      |                      |                              | SCM <sub>cv</sub>  | <b>0.978 ± 0.014</b> | <b>0.849 ± 0.129</b> | <b>0.994 ± 0.008</b> | <b>0.876 ± 0.078</b> | 1.0 ± 0.0       |             |               |                      |                      |                      |                 |
|                    |                      |                      |                      |                      |                              | spectinomycin      |                      | 290                  | 233                  | 57                   | 5.6             | L1-logistic | 0.890 ± 0.028 | 0.959 ± 0.028        | <b>0.629 ± 0.086</b> | 0.932 ± 0.018        | 4557.6 ± 3948.5 |
|                    |                      |                      |                      |                      |                              |                    |                      |                      |                      |                      |                 | L2-logistic | 0.886 ± 0.023 | 0.959 ± 0.021        | 0.618 ± 0.110        | 0.930 ± 0.015        | all*            |
| Majority           | 0.791 ± 0.034        | <b>1.000 ± 0.000</b> | 0.000 ± 0.000        | 0.883 ± 0.022        | –                            |                    |                      |                      |                      |                      |                 |             |               |                      |                      |                      |                 |
| Naive Bayes        | 0.850 ± 0.051        | 0.987 ± 0.018        | 0.341 ± 0.170        | 0.912 ± 0.030        | all                          |                    |                      |                      |                      |                      |                 |             |               |                      |                      |                      |                 |
| Poly-SVM           | 0.893 ± 0.028        | 0.983 ± 0.020        | 0.555 ± 0.101        | 0.935 ± 0.018        | all                          |                    |                      |                      |                      |                      |                 |             |               |                      |                      |                      |                 |
| RBF-SVM            | 0.888 ± 0.023        | 0.972 ± 0.022        | 0.576 ± 0.073        | 0.932 ± 0.015        | all                          |                    |                      |                      |                      |                      |                 |             |               |                      |                      |                      |                 |
| Random Forests     | <b>0.912 ± 0.033</b> | <b>0.993 ± 0.011</b> | 0.607 ± 0.118        | <b>0.947 ± 0.021</b> | 87.8 ± 93.7                  |                    |                      |                      |                      |                      |                 |             |               |                      |                      |                      |                 |
| CART <sub>b</sub>  | <b>0.919 ± 0.026</b> | <b>0.996 ± 0.009</b> | <b>0.629 ± 0.102</b> | <b>0.951 ± 0.016</b> | 1.0 ± 0.0                    |                    |                      |                      |                      |                      |                 |             |               |                      |                      |                      |                 |
| CART <sub>cv</sub> | <b>0.917 ± 0.023</b> | <b>0.994 ± 0.010</b> | <b>0.629 ± 0.102</b> | <b>0.950 ± 0.014</b> | 1.4 ± 1.0                    |                    |                      |                      |                      |                      |                 |             |               |                      |                      |                      |                 |
| SCM <sub>b</sub>   | <b>0.919 ± 0.026</b> | <b>0.996 ± 0.009</b> | <b>0.629 ± 0.102</b> | <b>0.951 ± 0.016</b> | 1.0 ± 0.0                    |                    |                      |                      |                      |                      |                 |             |               |                      |                      |                      |                 |
| SCM <sub>cv</sub>  | <b>0.917 ± 0.024</b> | <b>0.991 ± 0.011</b> | <b>0.638 ± 0.106</b> | <b>0.950 ± 0.015</b> | 1.9 ± 1.6                    |                    |                      |                      |                      |                      |                 |             |               |                      |                      |                      |                 |
| streptomycin       |                      | 347                  | 291                  | 56                   | 6.9                          |                    |                      |                      |                      |                      |                 | L1-logistic | 0.943 ± 0.026 | 0.970 ± 0.029        | 0.826 ± 0.075        | <b>0.965 ± 0.016</b> | 90.3 ± 21.2     |
|                    |                      |                      |                      |                      |                              |                    |                      |                      |                      |                      |                 | L2-logistic | 0.929 ± 0.032 | 0.959 ± 0.038        | 0.791 ± 0.062        | 0.956 ± 0.021        | all*            |
|                    |                      |                      |                      |                      |                              |                    |                      |                      |                      |                      |                 | Majority    | 0.822 ± 0.033 | <b>1.000 ± 0.000</b> | 0.000 ± 0.000        | 0.902 ± 0.020        | –               |
|                    |                      |                      |                      |                      |                              | Naive Bayes        | 0.842 ± 0.032        | 0.975 ± 0.027        | 0.224 ± 0.073        | 0.910 ± 0.020        | all             |             |               |                      |                      |                      |                 |
|                    |                      |                      |                      |                      |                              | Poly-SVM           | 0.925 ± 0.044        | 0.982 ± 0.029        | 0.665 ± 0.156        | 0.955 ± 0.026        | all             |             |               |                      |                      |                      |                 |
|                    |                      |                      |                      |                      |                              | RBF-SVM            | 0.925 ± 0.042        | 0.981 ± 0.030        | 0.668 ± 0.139        | 0.955 ± 0.025        | all             |             |               |                      |                      |                      |                 |
|                    |                      |                      |                      |                      |                              | Random Forests     | 0.938 ± 0.031        | 0.972 ± 0.028        | 0.785 ± 0.135        | 0.962 ± 0.019        | 258.2 ± 370.7   |             |               |                      |                      |                      |                 |
|                    |                      |                      |                      |                      |                              | CART <sub>b</sub>  | 0.943 ± 0.026        | 0.970 ± 0.029        | 0.828 ± 0.069        | <b>0.965 ± 0.016</b> | 1.1 ± 0.3       |             |               |                      |                      |                      |                 |

Continued on next page

**Table S1.** (Continued)

| Species                | Antibiotic           | Genomes              | Resistant            | Susceptible          | <i>k</i> -mers<br>(millions) | Method             | Accuracy             | Sensitivity          | Specificity          | F1 score             | Complexity        |
|------------------------|----------------------|----------------------|----------------------|----------------------|------------------------------|--------------------|----------------------|----------------------|----------------------|----------------------|-------------------|
|                        | sulphonamides        | 341                  | 306                  | 35                   | 5.8                          | CART <sub>cv</sub> | <b>0.946 ± 0.030</b> | 0.975 ± 0.030        | 0.818 ± 0.076        | <b>0.967 ± 0.019</b> | 3.3 ± 2.9         |
|                        |                      |                      |                      |                      |                              | SCM <sub>b</sub>   | <b>0.946 ± 0.027</b> | 0.970 ± 0.029        | <b>0.839 ± 0.067</b> | <b>0.967 ± 0.017</b> | 1.1 ± 0.3         |
|                        |                      |                      |                      |                      |                              | SCM <sub>cv</sub>  | <b>0.954 ± 0.028</b> | 0.980 ± 0.030        | <b>0.831 ± 0.073</b> | <b>0.972 ± 0.018</b> | 1.9 ± 0.6         |
|                        |                      |                      |                      |                      |                              | L1-logistic        | <b>0.946 ± 0.017</b> | 0.987 ± 0.013        | 0.607 ± 0.120        | <b>0.970 ± 0.010</b> | 16480.8 ± 24362.6 |
|                        |                      |                      |                      |                      |                              | L2-logistic        | <b>0.951 ± 0.017</b> | 0.990 ± 0.015        | 0.643 ± 0.136        | <b>0.973 ± 0.010</b> | all*              |
|                        |                      |                      |                      |                      |                              | Majority           | 0.891 ± 0.033        | <b>1.000 ± 0.000</b> | 0.000 ± 0.000        | 0.942 ± 0.019        | –                 |
|                        |                      |                      |                      |                      |                              | Naive Bayes        | 0.878 ± 0.033        | 0.964 ± 0.019        | 0.191 ± 0.149        | 0.933 ± 0.019        | all               |
|                        |                      |                      |                      |                      |                              | Poly-SVM           | 0.943 ± 0.022        | <b>0.993 ± 0.008</b> | 0.540 ± 0.138        | <b>0.968 ± 0.013</b> | all               |
|                        |                      |                      |                      |                      |                              | RBF-SVM            | 0.931 ± 0.032        | 0.989 ± 0.013        | 0.480 ± 0.158        | 0.962 ± 0.018        | all               |
|                        |                      |                      |                      |                      |                              | Random Forests     | <b>0.954 ± 0.015</b> | 0.990 ± 0.011        | <b>0.657 ± 0.165</b> | <b>0.975 ± 0.008</b> | 2614.9 ± 3500.2   |
|                        |                      |                      |                      |                      |                              | CART <sub>b</sub>  | 0.909 ± 0.021        | 0.973 ± 0.033        | 0.406 ± 0.243        | 0.950 ± 0.011        | 1.6 ± 0.5         |
|                        |                      |                      |                      |                      |                              | CART <sub>cv</sub> | 0.918 ± 0.026        | 0.981 ± 0.019        | 0.419 ± 0.222        | 0.955 ± 0.014        | 3.0 ± 1.4         |
|                        |                      |                      |                      |                      |                              | SCM <sub>b</sub>   | 0.913 ± 0.022        | 0.976 ± 0.032        | 0.447 ± 0.263        | 0.952 ± 0.012        | 1.6 ± 0.7         |
|                        |                      |                      |                      |                      |                              | SCM <sub>cv</sub>  | 0.931 ± 0.021        | 0.984 ± 0.016        | 0.492 ± 0.236        | 0.962 ± 0.011        | 2.4 ± 0.7         |
|                        |                      |                      |                      |                      |                              | L1-logistic        | 0.888 ± 0.036        | 0.923 ± 0.042        | 0.769 ± 0.148        | 0.929 ± 0.025        | 1806.7 ± 1360.8   |
|                        |                      |                      |                      |                      |                              | L2-logistic        | 0.914 ± 0.032        | 0.949 ± 0.022        | 0.789 ± 0.095        | 0.946 ± 0.021        | all*              |
|                        |                      |                      |                      |                      |                              | Majority           | 0.793 ± 0.034        | <b>1.000 ± 0.000</b> | 0.000 ± 0.000        | 0.884 ± 0.022        | –                 |
|                        |                      |                      |                      |                      |                              |                    | tetracycline         | 347                  | 280                  | 67                   | 6.9               |
| Poly-SVM               | <b>0.935 ± 0.016</b> | 0.971 ± 0.015        | 0.799 ± 0.086        | <b>0.959 ± 0.010</b> | all                          |                    |                      |                      |                      |                      |                   |
| RBF-SVM                | <b>0.933 ± 0.020</b> | 0.978 ± 0.014        | 0.767 ± 0.068        | <b>0.959 ± 0.013</b> | all                          |                    |                      |                      |                      |                      |                   |
| Random Forests         | 0.912 ± 0.041        | 0.958 ± 0.024        | 0.739 ± 0.147        | 0.945 ± 0.025        | 2740.5 ± 2676.5              |                    |                      |                      |                      |                      |                   |
| CART <sub>b</sub>      | 0.910 ± 0.028        | 0.921 ± 0.019        | <b>0.877 ± 0.093</b> | 0.942 ± 0.020        | 2.2 ± 0.6                    |                    |                      |                      |                      |                      |                   |
| CART <sub>cv</sub>     | 0.909 ± 0.037        | 0.945 ± 0.032        | 0.778 ± 0.110        | 0.942 ± 0.025        | 6.6 ± 3.2                    |                    |                      |                      |                      |                      |                   |
| SCM <sub>b</sub>       | 0.912 ± 0.036        | 0.923 ± 0.029        | <b>0.877 ± 0.100</b> | 0.943 ± 0.025        | 2.0 ± 0.0                    |                    |                      |                      |                      |                      |                   |
| SCM <sub>cv</sub>      | 0.906 ± 0.030        | 0.938 ± 0.028        | 0.799 ± 0.143        | 0.940 ± 0.021        | 3.6 ± 1.4                    |                    |                      |                      |                      |                      |                   |
| L1-logistic            | 0.916 ± 0.029        | 0.510 ± 0.232        | 0.969 ± 0.032        | 0.555 ± 0.178        | 109872.9 ± 152324.6          |                    |                      |                      |                      |                      |                   |
| L2-logistic            | 0.921 ± 0.027        | <b>0.544 ± 0.235</b> | 0.971 ± 0.027        | 0.585 ± 0.159        | all*                         |                    |                      |                      |                      |                      |                   |
| Majority               | 0.887 ± 0.033        | 0.000 ± 0.000        | <b>1.000 ± 0.000</b> | –                    | –                            |                    |                      |                      |                      |                      |                   |
| Naive Bayes            | 0.871 ± 0.040        | 0.220 ± 0.128        | 0.954 ± 0.034        | –                    | all                          |                    |                      |                      |                      |                      |                   |
| Poly-SVM               | <b>0.931 ± 0.024</b> | 0.466 ± 0.155        | 0.990 ± 0.009        | 0.588 ± 0.135        | all                          |                    |                      |                      |                      |                      |                   |
| RBF-SVM                | <b>0.928 ± 0.026</b> | 0.458 ± 0.172        | 0.988 ± 0.011        | 0.574 ± 0.145        | all                          |                    |                      |                      |                      |                      |                   |
| Random Forests         | <b>0.928 ± 0.025</b> | 0.435 ± 0.189        | 0.990 ± 0.009        | 0.555 ± 0.168        | 1091.7 ± 2035.5              |                    |                      |                      |                      |                      |                   |
| CART <sub>b</sub>      | <b>0.937 ± 0.029</b> | 0.497 ± 0.188        | <b>0.993 ± 0.011</b> | <b>0.626 ± 0.176</b> | 1.0 ± 0.0                    |                    |                      |                      |                      |                      |                   |
| CART <sub>cv</sub>     | <b>0.929 ± 0.032</b> | 0.531 ± 0.187        | 0.980 ± 0.025        | <b>0.617 ± 0.188</b> | 2.9 ± 2.1                    |                    |                      |                      |                      |                      |                   |
| SCM <sub>b</sub>       | <b>0.937 ± 0.029</b> | 0.497 ± 0.188        | <b>0.993 ± 0.011</b> | <b>0.626 ± 0.176</b> | 1.0 ± 0.0                    |                    |                      |                      |                      |                      |                   |
| SCM <sub>cv</sub>      | <b>0.929 ± 0.032</b> | 0.531 ± 0.187        | 0.980 ± 0.025        | <b>0.617 ± 0.188</b> | 1.7 ± 1.3                    |                    |                      |                      |                      |                      |                   |
| <i>S. haemolyticus</i> | ciprofloxacin        | 120                  | 74                   | 46                   | 5.3                          | L1-logistic        | <b>0.925 ± 0.047</b> | 0.955 ± 0.052        | <b>0.883 ± 0.102</b> | <b>0.938 ± 0.042</b> | 279.1 ± 616.8     |
|                        |                      |                      |                      |                      |                              | L2-logistic        | 0.838 ± 0.057        | 0.894 ± 0.080        | 0.778 ± 0.167        | 0.867 ± 0.060        | all*              |
|                        |                      |                      |                      |                      |                              | Majority           | 0.629 ± 0.126        | <b>1.000 ± 0.000</b> | 0.000 ± 0.000        | 0.765 ± 0.103        | –                 |
|                        |                      |                      |                      |                      |                              | Naive Bayes        | 0.758 ± 0.136        | 0.678 ± 0.216        | <b>0.892 ± 0.103</b> | 0.756 ± 0.172        | all               |
|                        |                      |                      |                      |                      |                              | Poly-SVM           | 0.829 ± 0.077        | 0.856 ± 0.059        | 0.794 ± 0.196        | 0.859 ± 0.067        | all               |
|                        |                      |                      |                      |                      |                              | RBF-SVM            | 0.846 ± 0.068        | 0.877 ± 0.082        | 0.810 ± 0.117        | 0.871 ± 0.067        | all               |
|                        |                      |                      |                      |                      |                              | Random Forests     | 0.846 ± 0.040        | 0.903 ± 0.075        | 0.783 ± 0.137        | 0.875 ± 0.042        | 2820.0 ± 3407.8   |
|                        |                      |                      |                      |                      |                              | CART <sub>b</sub>  | <b>0.925 ± 0.047</b> | 0.955 ± 0.052        | <b>0.883 ± 0.102</b> | <b>0.938 ± 0.042</b> | 1.0 ± 0.0         |
|                        |                      |                      |                      |                      |                              | CART <sub>cv</sub> | <b>0.933 ± 0.053</b> | 0.961 ± 0.054        | <b>0.892 ± 0.109</b> | <b>0.944 ± 0.046</b> | 1.0 ± 0.0         |

Continued on next page

**Table S1.** (Continued)

| Species              | Antibiotic           | Genomes              | Resistant     | Susceptible          | <i>k</i> -mers<br>(millions) | Method             | Accuracy             | Sensitivity          | Specificity          | F1 score             | Complexity      |
|----------------------|----------------------|----------------------|---------------|----------------------|------------------------------|--------------------|----------------------|----------------------|----------------------|----------------------|-----------------|
|                      | fusidic acid         | 114                  | 39            | 75                   | 5.2                          | SCM <sub>b</sub>   | <b>0.925 ± 0.047</b> | 0.955 ± 0.052        | <b>0.883 ± 0.102</b> | <b>0.938 ± 0.042</b> | 1.0 ± 0.0       |
|                      |                      |                      |               |                      |                              | SCM <sub>cv</sub>  | <b>0.933 ± 0.053</b> | 0.961 ± 0.054        | <b>0.892 ± 0.109</b> | <b>0.944 ± 0.046</b> | 1.0 ± 0.0       |
|                      |                      |                      |               |                      |                              | L1-logistic        | <b>0.832 ± 0.113</b> | 0.729 ± 0.222        | 0.879 ± 0.107        | <b>0.749 ± 0.172</b> | 2732.4 ± 1611.9 |
|                      |                      |                      |               |                      |                              | L2-logistic        | 0.786 ± 0.105        | 0.716 ± 0.181        | 0.825 ± 0.134        | 0.704 ± 0.132        | all*            |
|                      |                      |                      |               |                      |                              | Majority           | 0.636 ± 0.091        | 0.000 ± 0.000        | <b>1.000 ± 0.000</b> | –                    | –               |
|                      |                      |                      |               |                      |                              | Naive Bayes        | 0.800 ± 0.084        | <b>0.742 ± 0.117</b> | 0.821 ± 0.102        | 0.725 ± 0.107        | all             |
|                      |                      |                      |               |                      |                              | Poly-SVM           | 0.800 ± 0.123        | 0.702 ± 0.174        | 0.855 ± 0.132        | 0.715 ± 0.155        | all             |
|                      |                      |                      |               |                      |                              | RBF-SVM            | 0.809 ± 0.100        | 0.675 ± 0.175        | 0.890 ± 0.084        | 0.714 ± 0.125        | all             |
|                      |                      |                      |               |                      |                              | Random Forests     | 0.818 ± 0.132        | 0.723 ± 0.186        | 0.866 ± 0.125        | <b>0.744 ± 0.182</b> | 1158.0 ± 2277.1 |
|                      |                      |                      |               |                      |                              | CART <sub>b</sub>  | <b>0.827 ± 0.113</b> | <b>0.743 ± 0.241</b> | 0.872 ± 0.093        | <b>0.743 ± 0.181</b> | 1.8 ± 0.4       |
|                      | CART <sub>cv</sub>   | 0.773 ± 0.117        | 0.662 ± 0.243 | 0.820 ± 0.120        | 0.664 ± 0.199                | 2.0 ± 0.7          |                      |                      |                      |                      |                 |
|                      | tetracycline         | 100                  | 37            | 63                   | 5.1                          | SCM <sub>b</sub>   | <b>0.827 ± 0.109</b> | 0.700 ± 0.256        | 0.893 ± 0.107        | 0.728 ± 0.182        | 1.7 ± 0.5       |
|                      |                      |                      |               |                      |                              | SCM <sub>cv</sub>  | 0.782 ± 0.137        | 0.654 ± 0.273        | 0.845 ± 0.096        | 0.664 ± 0.233        | 2.5 ± 1.4       |
|                      |                      |                      |               |                      |                              | L1-logistic        | 0.780 ± 0.067        | 0.669 ± 0.107        | 0.853 ± 0.082        | 0.698 ± 0.064        | 1550.3 ± 1271.7 |
|                      |                      |                      |               |                      |                              | L2-logistic        | <b>0.810 ± 0.061</b> | 0.744 ± 0.102        | 0.856 ± 0.074        | <b>0.745 ± 0.073</b> | all*            |
|                      |                      |                      |               |                      |                              | Majority           | 0.620 ± 0.082        | 0.000 ± 0.000        | <b>1.000 ± 0.000</b> | –                    | –               |
|                      |                      |                      |               |                      |                              | Naive Bayes        | 0.780 ± 0.079        | <b>0.809 ± 0.155</b> | 0.769 ± 0.136        | 0.731 ± 0.101        | all             |
|                      |                      |                      |               |                      |                              | Poly-SVM           | 0.745 ± 0.093        | 0.574 ± 0.259        | 0.874 ± 0.091        | 0.600 ± 0.187        | all             |
|                      |                      |                      |               |                      |                              | RBF-SVM            | 0.750 ± 0.085        | 0.584 ± 0.244        | 0.874 ± 0.091        | 0.613 ± 0.171        | all             |
|                      |                      |                      |               |                      |                              | Random Forests     | 0.795 ± 0.055        | 0.623 ± 0.191        | 0.917 ± 0.075        | 0.685 ± 0.108        | 1071.9 ± 1233.9 |
| CART <sub>b</sub>    |                      |                      |               |                      |                              | 0.785 ± 0.082      | 0.635 ± 0.163        | 0.892 ± 0.106        | 0.688 ± 0.112        | 1.0 ± 0.0            |                 |
| <i>S. pneumoniae</i> | cefuroxime           | 113                  | 68            | 45                   | 5.7                          | CART <sub>cv</sub> | 0.735 ± 0.088        | 0.686 ± 0.174        | 0.772 ± 0.156        | 0.658 ± 0.087        | 2.7 ± 1.9       |
|                      |                      |                      |               |                      |                              | SCM <sub>b</sub>   | 0.770 ± 0.116        | 0.603 ± 0.155        | 0.885 ± 0.159        | 0.667 ± 0.139        | 1.0 ± 0.0       |
|                      |                      |                      |               |                      |                              | SCM <sub>cv</sub>  | 0.730 ± 0.075        | 0.561 ± 0.128        | 0.838 ± 0.075        | 0.606 ± 0.084        | 2.2 ± 0.9       |
|                      |                      |                      |               |                      |                              | L1-logistic        | <b>0.977 ± 0.039</b> | 0.983 ± 0.038        | 0.966 ± 0.060        | <b>0.979 ± 0.038</b> | 777.9 ± 1049.9  |
|                      |                      |                      |               |                      |                              | L2-logistic        | 0.932 ± 0.069        | 0.934 ± 0.060        | 0.947 ± 0.088        | 0.938 ± 0.072        | all*            |
|                      |                      |                      |               |                      |                              | Majority           | 0.618 ± 0.127        | <b>1.000 ± 0.000</b> | 0.000 ± 0.000        | 0.757 ± 0.104        | –               |
|                      |                      |                      |               |                      |                              | Naive Bayes        | 0.877 ± 0.080        | 0.807 ± 0.164        | 0.978 ± 0.049        | 0.875 ± 0.112        | all             |
|                      |                      |                      |               |                      |                              | Poly-SVM           | 0.900 ± 0.082        | 0.894 ± 0.102        | 0.931 ± 0.092        | 0.911 ± 0.079        | all             |
|                      |                      |                      |               |                      |                              | RBF-SVM            | 0.891 ± 0.084        | 0.879 ± 0.113        | 0.937 ± 0.087        | 0.901 ± 0.083        | all             |
|                      |                      |                      |               |                      |                              | Random Forests     | <b>0.986 ± 0.031</b> | 0.983 ± 0.038        | <b>0.992 ± 0.024</b> | <b>0.986 ± 0.035</b> | 290.2 ± 691.2   |
|                      | chloramphenicol      | 409                  | 149           | 260                  | 6.4                          | CART <sub>b</sub>  | 0.945 ± 0.052        | 0.976 ± 0.050        | 0.903 ± 0.079        | 0.951 ± 0.050        | 1.0 ± 0.0       |
|                      |                      |                      |               |                      |                              | CART <sub>cv</sub> | 0.941 ± 0.043        | 0.969 ± 0.052        | 0.897 ± 0.084        | 0.947 ± 0.046        | 1.0 ± 0.0       |
|                      |                      |                      |               |                      |                              | SCM <sub>b</sub>   | 0.945 ± 0.052        | 0.976 ± 0.050        | 0.903 ± 0.079        | 0.951 ± 0.050        | 1.0 ± 0.0       |
|                      |                      |                      |               |                      |                              | SCM <sub>cv</sub>  | 0.936 ± 0.038        | 0.956 ± 0.051        | 0.911 ± 0.089        | 0.944 ± 0.043        | 1.2 ± 0.4       |
|                      |                      |                      |               |                      |                              | L1-logistic        | 0.948 ± 0.022        | <b>0.950 ± 0.023</b> | 0.947 ± 0.036        | 0.927 ± 0.031        | 1391.5 ± 1844.4 |
|                      |                      |                      |               |                      |                              | L2-logistic        | 0.949 ± 0.020        | 0.936 ± 0.029        | 0.957 ± 0.028        | 0.928 ± 0.027        | all*            |
|                      |                      |                      |               |                      |                              | Majority           | 0.654 ± 0.036        | 0.000 ± 0.000        | <b>1.000 ± 0.000</b> | –                    | –               |
|                      |                      |                      |               |                      |                              | Naive Bayes        | 0.910 ± 0.013        | 0.936 ± 0.034        | 0.896 ± 0.017        | 0.877 ± 0.020        | all             |
|                      |                      |                      |               |                      |                              | Poly-SVM           | 0.946 ± 0.021        | 0.929 ± 0.039        | 0.955 ± 0.027        | 0.922 ± 0.030        | all             |
|                      |                      |                      |               |                      |                              | RBF-SVM            | 0.944 ± 0.023        | 0.925 ± 0.041        | 0.955 ± 0.031        | 0.920 ± 0.032        | all             |
| Random Forests       | <b>0.957 ± 0.019</b> | <b>0.947 ± 0.030</b> | 0.962 ± 0.026 | <b>0.938 ± 0.027</b> | 92.2 ± 110.8                 |                    |                      |                      |                      |                      |                 |
| CART <sub>b</sub>    | <b>0.960 ± 0.018</b> | <b>0.951 ± 0.035</b> | 0.966 ± 0.026 | <b>0.943 ± 0.026</b> | 1.0 ± 0.0                    |                    |                      |                      |                      |                      |                 |
| CART <sub>cv</sub>   | <b>0.959 ± 0.018</b> | <b>0.947 ± 0.035</b> | 0.966 ± 0.026 | <b>0.941 ± 0.026</b> | 1.0 ± 0.0                    |                    |                      |                      |                      |                      |                 |
| SCM <sub>b</sub>     | <b>0.960 ± 0.018</b> | <b>0.951 ± 0.035</b> | 0.966 ± 0.026 | <b>0.943 ± 0.026</b> | 1.0 ± 0.0                    |                    |                      |                      |                      |                      |                 |

Continued on next page

**Table S1.** (Continued)

| Species            | Antibiotic           | Genomes              | Resistant            | Susceptible          | <i>k</i> -mers<br>(millions) | Method               | Accuracy             | Sensitivity          | Specificity          | F1 score        | Complexity           |                      |                      |                      |                 |
|--------------------|----------------------|----------------------|----------------------|----------------------|------------------------------|----------------------|----------------------|----------------------|----------------------|-----------------|----------------------|----------------------|----------------------|----------------------|-----------------|
| clindamycin        | 145                  | 28                   | 117                  | 6.0                  | SCM <sub>cv</sub>            | <b>0.959 ± 0.018</b> | <b>0.947 ± 0.035</b> | 0.966 ± 0.026        | <b>0.941 ± 0.026</b> | 1.0 ± 0.0       |                      |                      |                      |                      |                 |
|                    |                      |                      |                      |                      | L1-logistic                  | <b>0.986 ± 0.024</b> | <b>0.950 ± 0.127</b> | <b>0.996 ± 0.013</b> | 0.959 ± 0.082        | 211.2 ± 208.2   |                      |                      |                      |                      |                 |
|                    |                      |                      |                      |                      | L2-logistic                  | 0.948 ± 0.034        | 0.833 ± 0.187        | 0.979 ± 0.022        | 0.842 ± 0.112        | all*            |                      |                      |                      |                      |                 |
|                    |                      |                      |                      |                      | Majority                     | 0.810 ± 0.080        | 0.000 ± 0.000        | <b>1.000 ± 0.000</b> | –                    | –               |                      |                      |                      |                      |                 |
|                    |                      |                      |                      |                      | Naive Bayes                  | 0.907 ± 0.046        | 0.809 ± 0.233        | 0.932 ± 0.045        | 0.735 ± 0.192        | all             |                      |                      |                      |                      |                 |
|                    |                      |                      |                      |                      | Poly-SVM                     | 0.938 ± 0.048        | 0.760 ± 0.292        | 0.979 ± 0.022        | –                    | all             |                      |                      |                      |                      |                 |
|                    |                      |                      |                      |                      | RBF-SVM                      | 0.945 ± 0.037        | 0.780 ± 0.236        | 0.984 ± 0.021        | 0.802 ± 0.190        | all             |                      |                      |                      |                      |                 |
|                    |                      |                      |                      |                      | Random Forests               | <b>0.986 ± 0.024</b> | <b>0.950 ± 0.127</b> | <b>0.996 ± 0.014</b> | <b>0.962 ± 0.079</b> | 225.7 ± 532.5   |                      |                      |                      |                      |                 |
|                    |                      |                      |                      |                      | CART <sub>b</sub>            | <b>0.990 ± 0.023</b> | <b>0.950 ± 0.127</b> | <b>1.000 ± 0.000</b> | <b>0.970 ± 0.079</b> | 1.0 ± 0.0       |                      |                      |                      |                      |                 |
|                    |                      |                      |                      |                      | CART <sub>cv</sub>           | <b>0.990 ± 0.023</b> | <b>0.950 ± 0.127</b> | <b>1.000 ± 0.000</b> | <b>0.970 ± 0.079</b> | 1.0 ± 0.0       |                      |                      |                      |                      |                 |
|                    |                      |                      |                      |                      | SCM <sub>b</sub>             | <b>0.990 ± 0.023</b> | <b>0.950 ± 0.127</b> | <b>1.000 ± 0.000</b> | <b>0.970 ± 0.079</b> | 1.0 ± 0.0       |                      |                      |                      |                      |                 |
|                    |                      |                      |                      |                      | SCM <sub>cv</sub>            | <b>0.990 ± 0.023</b> | <b>0.950 ± 0.127</b> | <b>1.000 ± 0.000</b> | <b>0.970 ± 0.079</b> | 1.0 ± 0.0       |                      |                      |                      |                      |                 |
|                    |                      |                      |                      |                      | erythromycin                 | 324                  | 247                  | 77                   | 6.3                  | L1-logistic     | <b>0.961 ± 0.028</b> | 0.970 ± 0.023        | 0.932 ± 0.086        | <b>0.974 ± 0.019</b> | 4386.0 ± 4378.0 |
| L2-logistic        | 0.948 ± 0.029        | 0.966 ± 0.033        | 0.897 ± 0.075        | <b>0.965 ± 0.020</b> |                              |                      |                      |                      |                      | all*            |                      |                      |                      |                      |                 |
| Majority           | 0.742 ± 0.047        | <b>1.000 ± 0.000</b> | 0.000 ± 0.000        | 0.851 ± 0.031        |                              |                      |                      |                      |                      | –               |                      |                      |                      |                      |                 |
| Naive Bayes        | 0.706 ± 0.034        | 0.716 ± 0.034        | 0.686 ± 0.133        | 0.783 ± 0.029        |                              |                      |                      |                      |                      | all             |                      |                      |                      |                      |                 |
| Poly-SVM           | 0.941 ± 0.030        | 0.964 ± 0.034        | 0.872 ± 0.077        | 0.960 ± 0.022        |                              |                      |                      |                      |                      | all             |                      |                      |                      |                      |                 |
| RBF-SVM            | 0.941 ± 0.032        | 0.962 ± 0.035        | 0.879 ± 0.069        | 0.960 ± 0.023        |                              |                      |                      |                      |                      | all             |                      |                      |                      |                      |                 |
| Random Forests     | 0.934 ± 0.040        | 0.976 ± 0.022        | 0.823 ± 0.111        | 0.956 ± 0.028        |                              |                      |                      |                      |                      | 4155.2 ± 5134.4 |                      |                      |                      |                      |                 |
| CART <sub>b</sub>  | <b>0.952 ± 0.026</b> | 0.951 ± 0.027        | <b>0.950 ± 0.078</b> | <b>0.966 ± 0.019</b> |                              |                      |                      |                      |                      | 2.2 ± 0.4       |                      |                      |                      |                      |                 |
| CART <sub>cv</sub> | 0.948 ± 0.027        | 0.951 ± 0.031        | 0.937 ± 0.080        | 0.964 ± 0.019        |                              |                      |                      |                      |                      | 3.1 ± 1.1       |                      |                      |                      |                      |                 |
| SCM <sub>b</sub>   | <b>0.952 ± 0.026</b> | 0.951 ± 0.027        | <b>0.950 ± 0.078</b> | <b>0.966 ± 0.019</b> |                              |                      |                      |                      |                      | 2.2 ± 0.4       |                      |                      |                      |                      |                 |
| SCM <sub>cv</sub>  | 0.950 ± 0.030        | 0.959 ± 0.024        | 0.920 ± 0.096        | <b>0.966 ± 0.021</b> |                              |                      |                      |                      |                      | 2.8 ± 0.8       |                      |                      |                      |                      |                 |
| meropenem          | 114                  | 32                   | 82                   | 5.8                  |                              |                      |                      |                      |                      | L1-logistic     | <b>0.864 ± 0.074</b> | <b>0.907 ± 0.172</b> | 0.851 ± 0.122        | <b>0.783 ± 0.140</b> | 411.8 ± 470.4   |
|                    |                      |                      |                      |                      |                              |                      |                      |                      |                      | L2-logistic     | <b>0.868 ± 0.079</b> | 0.812 ± 0.164        | 0.888 ± 0.075        | 0.762 ± 0.201        | all*            |
|                    |                      |                      |                      |                      | Majority                     | 0.705 ± 0.086        | 0.000 ± 0.000        | <b>1.000 ± 0.000</b> | –                    | –               |                      |                      |                      |                      |                 |
|                    |                      |                      |                      |                      | Naive Bayes                  | 0.836 ± 0.089        | 0.818 ± 0.192        | 0.839 ± 0.071        | 0.721 ± 0.214        | all             |                      |                      |                      |                      |                 |
|                    |                      |                      |                      |                      | Poly-SVM                     | 0.818 ± 0.068        | 0.676 ± 0.184        | 0.883 ± 0.077        | 0.666 ± 0.178        | all             |                      |                      |                      |                      |                 |
|                    |                      |                      |                      |                      | RBF-SVM                      | 0.818 ± 0.068        | 0.676 ± 0.184        | 0.883 ± 0.077        | 0.666 ± 0.178        | all             |                      |                      |                      |                      |                 |
|                    |                      |                      |                      |                      | Random Forests               | 0.850 ± 0.074        | 0.799 ± 0.166        | 0.893 ± 0.100        | 0.742 ± 0.154        | 313.2 ± 209.0   |                      |                      |                      |                      |                 |
|                    |                      |                      |                      |                      | CART <sub>b</sub>            | 0.850 ± 0.077        | <b>0.914 ± 0.101</b> | 0.827 ± 0.111        | 0.769 ± 0.150        | 1.0 ± 0.0       |                      |                      |                      |                      |                 |
|                    |                      |                      |                      |                      | CART <sub>cv</sub>           | 0.827 ± 0.093        | 0.733 ± 0.240        | 0.850 ± 0.117        | 0.685 ± 0.220        | 2.4 ± 1.4       |                      |                      |                      |                      |                 |
|                    |                      |                      |                      |                      | SCM <sub>b</sub>             | <b>0.864 ± 0.091</b> | 0.876 ± 0.166        | 0.846 ± 0.121        | 0.771 ± 0.205        | 1.0 ± 0.0       |                      |                      |                      |                      |                 |
|                    |                      |                      |                      |                      | SCM <sub>cv</sub>            | 0.850 ± 0.088        | 0.860 ± 0.178        | 0.832 ± 0.108        | 0.750 ± 0.204        | 1.2 ± 0.4       |                      |                      |                      |                      |                 |
|                    |                      |                      |                      |                      | penicillin                   | 172                  | 113                  | 59                   | 5.8                  | L1-logistic     | <b>0.994 ± 0.012</b> | <b>0.996 ± 0.014</b> | <b>0.992 ± 0.024</b> | <b>0.995 ± 0.010</b> | 233.3 ± 219.9   |
|                    |                      |                      |                      |                      |                              |                      |                      |                      |                      | L2-logistic     | 0.976 ± 0.033        | 0.988 ± 0.027        | 0.953 ± 0.062        | 0.983 ± 0.024        | all*            |
| Majority           | 0.694 ± 0.068        | <b>1.000 ± 0.000</b> | 0.000 ± 0.000        | 0.818 ± 0.048        |                              |                      |                      |                      |                      | –               |                      |                      |                      |                      |                 |
| Naive Bayes        | 0.835 ± 0.048        | 0.774 ± 0.066        | 0.970 ± 0.049        | 0.865 ± 0.045        |                              |                      |                      |                      |                      | all             |                      |                      |                      |                      |                 |
| Poly-SVM           | 0.941 ± 0.046        | 0.964 ± 0.044        | 0.889 ± 0.094        | 0.958 ± 0.031        |                              |                      |                      |                      |                      | all             |                      |                      |                      |                      |                 |
| RBF-SVM            | 0.950 ± 0.042        | 0.975 ± 0.035        | 0.889 ± 0.094        | 0.964 ± 0.029        |                              |                      |                      |                      |                      | all             |                      |                      |                      |                      |                 |
| Random Forests     | <b>0.994 ± 0.012</b> | <b>0.996 ± 0.014</b> | <b>0.986 ± 0.045</b> | <b>0.996 ± 0.009</b> |                              |                      |                      |                      |                      | 436.0 ± 730.2   |                      |                      |                      |                      |                 |
| CART <sub>b</sub>  | 0.982 ± 0.025        | <b>0.996 ± 0.014</b> | 0.949 ± 0.073        | <b>0.988 ± 0.018</b> |                              |                      |                      |                      |                      | 1.0 ± 0.0       |                      |                      |                      |                      |                 |
| CART <sub>cv</sub> | 0.982 ± 0.025        | <b>0.996 ± 0.014</b> | 0.949 ± 0.073        | <b>0.988 ± 0.018</b> |                              |                      |                      |                      |                      | 1.0 ± 0.0       |                      |                      |                      |                      |                 |
| SCM <sub>b</sub>   | 0.982 ± 0.025        | <b>0.996 ± 0.014</b> | 0.949 ± 0.073        | <b>0.988 ± 0.018</b> |                              |                      |                      |                      |                      | 1.0 ± 0.0       |                      |                      |                      |                      |                 |
| SCM <sub>cv</sub>  | 0.979 ± 0.020        | 0.983 ± 0.021        | 0.969 ± 0.053        | 0.985 ± 0.014        |                              |                      |                      |                      |                      | 1.0 ± 0.0       |                      |                      |                      |                      |                 |

Continued on next page



**Table S1.** (Continued)

| Species            | Antibiotic                         | Genomes            | Resistant   | Susceptible        | <i>k</i> -mers<br>(millions) | Method             | Accuracy           | Sensitivity        | Specificity        | F1 score           | Complexity        |
|--------------------|------------------------------------|--------------------|-------------|--------------------|------------------------------|--------------------|--------------------|--------------------|--------------------|--------------------|-------------------|
|                    | tetracycline                       | 393                | 284         | 109                | 6.2                          | L1-logicistic      | 0.956±0.020        | 0.976±0.015        | 0.909±0.042        | 0.969±0.015        | 9330.3 ± 9714.3   |
|                    |                                    |                    |             |                    |                              | L2-logicistic      | 0.956±0.022        | 0.978±0.012        | 0.902±0.050        | 0.969±0.016        | all*              |
|                    |                                    |                    |             |                    |                              | Majority           | 0.714±0.050        | <b>1.000±0.000</b> | 0.000±0.000        | 0.832±0.035        | –                 |
|                    |                                    |                    |             |                    |                              | Naive Bayes        | 0.869±0.057        | 0.887±0.067        | 0.822±0.057        | 0.904±0.047        | all               |
|                    |                                    |                    |             |                    |                              | Poly-SVM           | 0.949±0.018        | 0.980±0.015        | 0.874±0.047        | 0.964±0.013        | all               |
|                    |                                    |                    |             |                    |                              | RBF-SVM            | 0.942±0.017        | 0.973±0.012        | 0.869±0.050        | 0.960±0.013        | all               |
|                    |                                    |                    |             |                    |                              | Random Forests     | 0.959±0.025        | 0.985±0.014        | 0.894±0.057        | <b>0.971±0.017</b> | 493.3 ± 840.0     |
|                    |                                    |                    |             |                    |                              | CART <sub>b</sub>  | <b>0.964±0.019</b> | 0.985±0.014        | 0.911±0.042        | <b>0.975±0.013</b> | 1.0 ± 0.0         |
|                    |                                    |                    |             |                    |                              | CART <sub>cv</sub> | <b>0.965±0.019</b> | 0.977±0.020        | <b>0.937±0.037</b> | <b>0.976±0.014</b> | 2.6 ± 1.6         |
|                    | SCM <sub>b</sub>                   | <b>0.964±0.019</b> | 0.985±0.014 | 0.911±0.042        | <b>0.975±0.013</b>           | 1.0 ± 0.0          |                    |                    |                    |                    |                   |
|                    | SCM <sub>cv</sub>                  | <b>0.971±0.016</b> | 0.983±0.016 | <b>0.937±0.037</b> | <b>0.979±0.012</b>           | 2.4 ± 0.8          |                    |                    |                    |                    |                   |
|                    | trimethoprim/sul-<br>famethoxazole | 2826               | 2187        | 639                | 24.2                         | L1-logicistic      | 0.928±0.011        | 0.942±0.014        | <b>0.880±0.024</b> | 0.953±0.008        | 7172.4 ± 6532.7   |
|                    |                                    |                    |             |                    |                              | L2-logicistic      | 0.926±0.010        | 0.943±0.019        | 0.867±0.030        | 0.952±0.008        | all*              |
|                    |                                    |                    |             |                    |                              | Majority           | 0.778±0.015        | <b>1.000±0.000</b> | 0.000±0.000        | 0.875±0.009        | –                 |
|                    |                                    |                    |             |                    |                              | Naive Bayes        | 0.854±0.019        | 0.852±0.026        | 0.858±0.032        | 0.900±0.015        | all               |
|                    |                                    |                    |             |                    |                              | Poly-SVM           | <b>0.935±0.006</b> | 0.969±0.008        | 0.815±0.041        | <b>0.958±0.004</b> | all               |
|                    |                                    |                    |             |                    |                              | RBF-SVM            | <b>0.934±0.006</b> | 0.970±0.009        | 0.811±0.042        | <b>0.958±0.004</b> | all               |
|                    |                                    |                    |             |                    |                              | Random Forests     | <b>0.943±0.008</b> | 0.984±0.005        | 0.801±0.025        | <b>0.964±0.005</b> | 19693.3 ± 25788.2 |
|                    |                                    |                    |             |                    |                              | CART <sub>b</sub>  | <b>0.939±0.010</b> | 0.973±0.008        | 0.819±0.029        | <b>0.961±0.007</b> | 5.4 ± 1.0         |
| CART <sub>cv</sub> |                                    |                    |             |                    |                              | <b>0.938±0.010</b> | 0.971±0.009        | 0.822±0.030        | <b>0.960±0.007</b> | 8.6 ± 4.4          |                   |
| SCM <sub>b</sub>   |                                    |                    |             |                    |                              | <b>0.938±0.011</b> | 0.981±0.013        | 0.789±0.017        | <b>0.961±0.007</b> | 3.1 ± 0.3          |                   |
| SCM <sub>cv</sub>  | <b>0.937±0.008</b>                 | 0.983±0.006        | 0.778±0.024 | <b>0.961±0.005</b> | 4.0 ± 2.8                    |                    |                    |                    |                    |                    |                   |

**Table S2.** Extended benchmark. Comparison to state-of-the-art classifiers in terms of accuracy and model complexity. For each dataset the accuracy is shown, along with the number of  $k$ -mers used by the model (in parentheses). Results are shown for Set Covering Machines (SCM), Classification trees (CART), Random Forests<sup>13</sup> with  $\chi^2$  feature selection, Logistic regression with L1 and L2 regularization and  $\chi^2$  feature selection (L1-logistic, L2-logistic), Polynomial kernel and RBF kernel Support Vector Machines (Poly-SVM, RBF-SVM), Naive Bayes, and a baseline predictor that predicts the most abundant class in the data (Majority). Accuracies within 1% of the maximum value are shown in bold. Results are averaged over ten repetitions of the experiment.

| Dataset                | SCM <sub>b</sub>   | CART <sub>b</sub>  | Random forests* <sup>†</sup> | L1-logistic* <sup>†</sup> | L2-logistic* <sup>†</sup> | Poly-SVM <sup>†</sup> | RBF-SVM <sup>†</sup> | Naive Bayes | Majority |
|------------------------|--------------------|--------------------|------------------------------|---------------------------|---------------------------|-----------------------|----------------------|-------------|----------|
| <i>A. baumannii</i>    | 0.849 (2.7)        | 0.864 (3.4)        | <b>0.892</b> (6314.6)        | 0.880 (3980.5)            | <b>0.885</b> (1e6)        | <b>0.886</b> (all)    | 0.880 (all)          | 0.822 (all) | 0.644    |
| <i>E. coli</i>         | <b>0.818</b> (4.6) | <b>0.808</b> (7.0) | <b>0.812</b> (39289.6)       | 0.792 (3727.2)            | 0.789 (1e6)               | 0.779 (all)           | 0.776 (all)          | 0.634 (all) | 0.697    |
| <i>E. faecium</i>      | <b>1.000</b> (1.0) | <b>1.000</b> (1.0) | <b>1.000</b> (202.6)         | <b>1.000</b> (142.0)      | <b>1.000</b> (1e6)        | <b>0.996</b> (all)    | <b>0.992</b> (all)   | 0.808 (all) | 0.588    |
| <i>K. pneumoniae</i>   | <b>0.950</b> (3.9) | <b>0.949</b> (4.3) | <b>0.956</b> (42856.8)       | <b>0.952</b> (7607.4)     | <b>0.948</b> (1e6)        | 0.943 (all)           | 0.943 (all)          | 0.760 (all) | 0.571    |
| <i>M. tuberculosis</i> | <b>0.963</b> (4.5) | <b>0.962</b> (4.7) | <b>0.962</b> (78761.3)       | <b>0.962</b> (2242.2)     | 0.941 (1e6)               | 0.934 (all)           | 0.930 (all)          | 0.789 (all) | 0.658    |
| <i>N. gonorrhoeae</i>  | <b>0.935</b> (3.0) | <b>0.936</b> (3.3) | 0.895 (4571.7)               | <b>0.942</b> (6095.6)     | 0.915 (1e6)               | 0.906 (all)           | 0.905 (all)          | 0.736 (all) | 0.529    |
| <i>P. aeruginosa</i>   | <b>0.939</b> (1.2) | <b>0.942</b> (1.1) | 0.874 (21600.5)              | <b>0.937</b> (87.8)       | 0.828 (1e6)               | 0.773 (all)           | 0.762 (all)          | 0.768 (all) | 0.588    |
| <i>P. difficile</i>    | <b>0.982</b> (1.0) | <b>0.982</b> (1.0) | 0.949 (662.2)                | 0.957 (121.8)             | 0.936 (1e6)               | 0.949 (all)           | 0.951 (all)          | 0.887 (all) | 0.599    |
| <i>S. aureus</i>       | <b>0.987</b> (1.0) | <b>0.987</b> (1.0) | <b>0.987</b> (408.8)         | <b>0.988</b> (230.6)      | <b>0.987</b> (1e6)        | <b>0.987</b> (all)    | <b>0.987</b> (all)   | 0.868 (all) | 0.544    |
| <i>S. enterica</i>     | 0.913 (1.0)        | 0.913 (1.0)        | <b>0.926</b> (2354.8)        | <b>0.925</b> (991.2)      | <b>0.929</b> (1e6)        | <b>0.920</b> (all)    | <b>0.928</b> (all)   | 0.759 (all) | 0.709    |
| <i>S. haemolyticus</i> | <b>0.925</b> (1.0) | <b>0.925</b> (1.0) | 0.846 (2820.0)               | <b>0.925</b> (279.1)      | 0.838 (1e6)               | 0.829 (all)           | 0.846 (all)          | 0.758 (all) | 0.629    |
| <i>S. pneumoniae</i>   | <b>0.960</b> (1.0) | <b>0.960</b> (1.0) | <b>0.957</b> (92.2)          | 0.948 (1391.5)            | 0.949 (1e6)               | 0.946 (all)           | 0.944 (all)          | 0.910 (all) | 0.654    |

\* For scalability reasons, these algorithms were trained using feature selection to select the one million  $k$ -mers that were most associated with the phenotypes; all other  $k$ -mers were discarded (see *Methods*).

<sup>†</sup> The implementations available in Scikit-Learn 0.18.2 were used. When applicable, the kernel matrices were precomputed using custom code based on the  $k$ -mer matrices.

**Table S3.** Sample compression bound values for the SCM<sub>b</sub> models on each benchmark dataset. We report other quantities that are relevant to the interpretation of the bound, such as the accuracy and complexity (number of rules) of the models and the number of examples in the datasets. We also show the number of  $k$ -mers in each dataset, since, surprisingly, this value does not take part in the calculation of the bound. The reader is encouraged to observe the expression of the bound (Equation (2)) in parallel to understand how each quantity affects the bound. Note that values that varied over ten repetitions of the experiment are shown as mean  $\pm$  standard deviation.

| Dataset                | Bound             | Accuracy          | Complexity    | Examples | $k$ -mers (millions) |
|------------------------|-------------------|-------------------|---------------|----------|----------------------|
| <i>A. baumannii</i>    | 0.427 $\pm$ 0.022 | 0.849 $\pm$ 0.031 | 2.7 $\pm$ 0.5 | 499      | 42.4                 |
| <i>E. coli</i>         | 0.473 $\pm$ 0.007 | 0.818 $\pm$ 0.019 | 4.6 $\pm$ 1.1 | 1524     | 48.5                 |
| <i>E. faecium</i>      | 0.236 $\pm$ 0.000 | 1.000 $\pm$ 0.000 | 1.0 $\pm$ 0.0 | 134      | 10.3                 |
| <i>K. pneumoniae</i>   | 0.220 $\pm$ 0.003 | 0.950 $\pm$ 0.007 | 3.9 $\pm$ 0.7 | 2107     | 70.3                 |
| <i>M. tuberculosis</i> | 0.160 $\pm$ 0.003 | 0.963 $\pm$ 0.005 | 4.5 $\pm$ 0.5 | 5022     | 11.7                 |
| <i>N. gonorrhoeae</i>  | 0.331 $\pm$ 0.018 | 0.935 $\pm$ 0.030 | 3.0 $\pm$ 0.0 | 392      | 4.8                  |
| <i>P. aeruginosa</i>   | 0.284 $\pm$ 0.015 | 0.939 $\pm$ 0.023 | 1.2 $\pm$ 0.4 | 491      | 43.0                 |
| <i>P. difficile</i>    | 0.164 $\pm$ 0.009 | 0.982 $\pm$ 0.009 | 1.0 $\pm$ 0.0 | 462      | 19.8                 |
| <i>S. aureus</i>       | 0.074 $\pm$ 0.005 | 0.987 $\pm$ 0.005 | 1.0 $\pm$ 0.0 | 1593     | 13.3                 |
| <i>S. enterica</i>     | 0.369 $\pm$ 0.012 | 0.913 $\pm$ 0.024 | 1.0 $\pm$ 0.0 | 347      | 6.9                  |
| <i>S. haemolyticus</i> | 0.431 $\pm$ 0.027 | 0.925 $\pm$ 0.047 | 1.0 $\pm$ 0.0 | 120      | 5.3                  |
| <i>S. pneumoniae</i>   | 0.233 $\pm$ 0.013 | 0.960 $\pm$ 0.018 | 1.0 $\pm$ 0.0 | 409      | 6.4                  |

**Table S4.** Sample compression bound values for the  $\text{CART}_b$  models on each benchmark dataset. We report other quantities that are relevant to the interpretation of the bound, such as the accuracy and complexity (number of rules) of the models and the number of examples in the datasets. We also show the number of  $k$ -mers in each dataset, since, surprisingly, this value does not take part in the calculation of the bound. The reader is encouraged to observe the expression of the bound (Equation (3)) in parallel to understand how each quantity affects the bound. Note that values that varied over ten repetitions of the experiment are shown as mean  $\pm$  standard deviation.

| Dataset                | Bound             | Accuracy          | Complexity    | Examples | $k$ -mers<br>(millions) |
|------------------------|-------------------|-------------------|---------------|----------|-------------------------|
| <i>A. baumannii</i>    | $0.423 \pm 0.010$ | $0.864 \pm 0.042$ | $3.4 \pm 0.7$ | 499      | 42.4                    |
| <i>E. coli</i>         | $0.464 \pm 0.008$ | $0.808 \pm 0.021$ | $7.0 \pm 0.7$ | 1524     | 48.5                    |
| <i>E. faecium</i>      | $0.249 \pm 0.000$ | $1.000 \pm 0.000$ | $1.0 \pm 0.0$ | 134      | 10.3                    |
| <i>K. pneumoniae</i>   | $0.223 \pm 0.004$ | $0.949 \pm 0.007$ | $4.3 \pm 1.2$ | 2107     | 70.3                    |
| <i>M. tuberculosis</i> | $0.162 \pm 0.003$ | $0.962 \pm 0.004$ | $4.7 \pm 1.2$ | 5022     | 11.7                    |
| <i>N. gonorrhoeae</i>  | $0.341 \pm 0.017$ | $0.936 \pm 0.039$ | $3.3 \pm 0.5$ | 392      | 4.8                     |
| <i>P. aeruginosa</i>   | $0.288 \pm 0.015$ | $0.942 \pm 0.028$ | $1.1 \pm 0.3$ | 491      | 43.0                    |
| <i>P. difficile</i>    | $0.168 \pm 0.009$ | $0.982 \pm 0.009$ | $1.0 \pm 0.0$ | 462      | 19.8                    |
| <i>S. aureus</i>       | $0.076 \pm 0.005$ | $0.987 \pm 0.005$ | $1.0 \pm 0.0$ | 1593     | 13.3                    |
| <i>S. enterica</i>     | $0.373 \pm 0.012$ | $0.913 \pm 0.024$ | $1.0 \pm 0.0$ | 347      | 6.9                     |
| <i>S. haemolyticus</i> | $0.442 \pm 0.027$ | $0.925 \pm 0.047$ | $1.0 \pm 0.0$ | 120      | 5.3                     |
| <i>S. pneumoniae</i>   | $0.237 \pm 0.013$ | $0.960 \pm 0.018$ | $1.0 \pm 0.0$ | 409      | 6.4                     |

## References

1. Littlestone, N. & Warmuth, M. Relating data compression and learnability. Tech. Rep., University of California Santa Cruz, Santa Cruz, CA (1986).
2. Floyd, S. & Warmuth, M. Sample compression, learnability, and the Vapnik-Chervonenkis dimension. *Mach. Learn.* **21**, 269–304 (1995).
3. Marchand, M. & Sokolova, M. Learning with decision lists of data-dependent features. *J. Mach. Learn. Res.* **6**, 427–451 (2005).
4. Vapnik, V. *Statistical learning theory*. 1998, vol. 3 (Wiley, New York, 1998).
5. Mendelson, S. Rademacher averages and phase transitions in glivenko-cantelli classes. *IEEE transactions on Inf. Theory* **48**, 251–263 (2002).
6. Yıldız, O. T. Vc-dimension of univariate decision trees. *IEEE transactions on neural networks learning systems* **26**, 378–387 (2015).
7. Bartlett, P. L. & Mendelson, S. Rademacher and gaussian complexities: Risk bounds and structural results. *J. Mach. Learn. Res.* **3**, 463–482 (2002).
8. Kääriäinen, M., Malinen, T. & Elomaa, T. Selective rademacher penalization and reduced error pruning of decision trees. *J. Mach. Learn. Res.* **5**, 1107–1126 (2004).
9. Drouin, A. *et al.* Predictive computational phenotyping and biomarker discovery using reference-free genome comparisons. *BMC genomics* **17**, 754 (2016).
10. Marchand, M. & Shawe-Taylor, J. The set covering machine. *The J. Mach. Learn. Res.* **3**, 723–746 (2002).
11. Shah, M. Sample compression bounds for decision trees. In *Proceedings of the 24th international conference on Machine learning*, 799–806 (ACM, 2007).
12. Breiman, L., Friedman, J., Stone, C. J. & Olshen, R. A. *Classification and regression trees* (CRC press, New York, 1984).
13. Breiman, L. Random forests. *Mach. learning* **45**, 5–32 (2001).
